# Supplementary material
Source: MDPI journal article supplement (https://www.mdpi.com/2304-6775/8/2/30)
Supplement: s1 [file s1]

## Sheet: COVID-19
Title	DOI	Published	End of reported period	Received	Accepted	Article type	Comment	Authors	Journal
Note from the editors: Don’t stop thinking about tomorrow	10.2807/1560-7917.ES.2020.25.1.2001091	2020-01-09				Editorial			Euro Surveill
The continuing 2019-nCoV epidemic threat of novel coronaviruses to global health — The latest 2019 novel coronavirus outbreak in Wuhan, China	10.1016/j.ijid.2020.01.009	2020-01-14	2020-01-10			Editorial		Hui, David S.	International Journal of Infectious Diseases
Pneumonia of Unknown Etiology in Wuhan, China: Potential for International Spread Via Commercial Air Travel	10.1093/jtm/taaa008	2020-01-14		2020-01-08	2020-01-10	Commentary		Bogoch, I. I.; Watts, A.; Thomas-Bachli, A.; Huber, C.; Kraemer, M. U. G.; Khan, K.	Journal of travel medicine
Outbreak of pneumonia of unknown etiology in Wuhan, China: The mystery and the miracle	10.1002/jmv.25678	2020-01-16				Commentary		Hongzhou Lu, Charles W. Stratton, Yi‐Wei Tang	Journal of Medical Virology
New SARS-like virus in China triggers alarm	10.1126/science.367.6475.234	2020-01-17				Commentary		Cohen, J.; Normile, D.	Science
Preparedness and proactive infection control measures against the emerging novel coronavirus in China	10.1016/j.jhin.2020.01.010	2020-01-18		2020-01-13	2020-01-13	Commentary		Cheng, V. C. C.; Wong, S. C.; To, K. K. W.; Ho, P. L.; Yuen, K. Y.	Journal of Hospital Infection
Coronaviruses in animals and humans	10.1136/bmj.m634	2020-01-19				Editorial		Lisa F P Ng, Julian A Hiscox,	BMJ
New virus in China requires international control effort	10.1038/d41586-020-00135-z	2020-01-19				Commentary		Liu, S. L.	Nature
Coronavirus: Wales tests 90% of suspected patients in their own home	10.1136/bmj.m698	2020-02-20	2020-02-13			News Item	It contains data from 18, Jan., 2020	Mahase, Elisabeth	BMJ
China coronavirus: cases surge as official admits human to human transmission	10.1136/bmj.m236	2020-01-20	2020-01-20			News Item			Parry, J.	BMJ (Clinical research ed.)
Evolution of the novel coronavirus from the ongoing Wuhan outbreak and modeling of its spike protein for risk of human transmission	10.1007/s11427-020-1637-5	2020-01-21	2020-01-15	2020-01-16	2020-01-20	Research		Xu, Xintian; Chen, Ping; Wang, Jingfang; Feng, Jiannan; Zhou, Hui; Li, Xuan; Zhong, Wu; Hao, Pei	Sci China Life Sci
Emerging coronaviruses: Genome structure, replication, and pathogenesis	10.1002/jmv.25681	2020-01-22	2020-01-20	2020-01-20	2020-01-21	Review		Chen, Y.; Liu, Q.; Guo, D.	Journal of Medical Virology
Emerging Viruses without Borders: The Wuhan Coronavirus	10.3390/v12020130	2020-01-22	2020-01-22	2020-01-22	2020-01-22	Editorial		Shan-Lu Liu, Linda Saif	Viruses
China coronavirus: Six questions scientists are asking	10.1038/d41586-020-00166-6	2020-01-22				News Item		Callaway, E.; Cyranoski, D.	Nature
Coronavirus: UK screens direct flights from Wuhan after US case	10.1136/bmj.m265	2020-01-22	2020-01-22			News Item		Mahase, E.	BMJ
Rapid outbreak response requires trust	10.1038/s41564-020-0670-8	2020-01-22				Editorial			Nature Microbiology
Global Health Concern Stirred by Emerging Viral Infections	10.1002/jmv.25683	2020-01-22		2020-01-21	2020-01-21	Commentary		Luo, G. G.; Gao, S. J.	Journal of medical virology
Real-time tentative assessment of the epidemiological characteristics of novel coronavirus infections in Wuhan, China, as at 22 January 2020	10.2807/1560-7917.ES.2020.25.3.2000044	2020-01-23	2020-01-22	2020-01-21	2020-01-23	Research		['Wu, Peng', 'Hao, Xinxin', 'Lau, Eric H Y', 'Wong, Jessica Y', 'Leung, Kathy S M', 'Wu, Joseph T', 'Cowling, Benjamin J', 'Leung, Gabriel M']	Eurosurveillance
Detection of 2019 novel coronavirus (2019-nCoV) by real-time RT-PCR	10.2807/1560-7917.ES.2020.25.3.2000045	2020-01-23	2020-01-20	2020-01-21	2020-01-22	Research		Corman, V. M.; Landt, O.; Kaiser, M.; Molenkamp, R.; Meijer, A.; Chu, D. K.; Bleicker, T.; Brünink, S.; Schneider, J.; Schmidt, M. L.; Mulders, D. G.; Haagmans, B. L.; van der Veer, B.; van den Brink, S.; Wijsman, L.; Goderski, G.; Romette, J. L.; Ellis, J.; Zambon, M.; Peiris, M.; Goossens, H.; Reusken, C.; Koopmans, M. P.; Drosten, C.	Eurosurveillance
Coronavirus Infections—More Than Just the Common Cold	10.1001/jama.2020.0757	2020-01-23	2020-01-21			Commentary		Paules, C. I.; Marston, H. D.; Fauci, A. S.	JAMA - Journal of the American Medical Association
Clinical features of patients infected with 2019 novel coronavirus in Wuhan, China	10.1016/S0140-6736(20)30183-5	2020-01-24	2020-01-02			Case study	Corrected on 30.Jan.2020	Huang, C.; Wang, Y.; Li, X.	The Lancet
A novel coronavirus outbreak of global health concern	10.1016/S0140-6736(20)30185-9	2020-01-24	2020-01-23			Editorial	Corrected on 29.Jan.2020	Chen Wang, Peter W Horby, Frederick G Hayden, George F Gao	The Lancet
A familial cluster of pneumonia associated with the 2019 novel coronavirus indicating person-to-person transmission: a study of a family cluster	10.1016/S0140-6736(20)30154-9	2020-01-24	2020-01-15			Case study		Chan et al.	The Lancet
The Extent of Transmission of Novel Coronavirus in Wuhan, China, 2020	10.3390/jcm9020330	2020-01-24	2020-01-24	2020-01-22	2020-01-23	Editorial		Nishiura, Hiroshi; Jung, Sung-mok; Linton, Natalie M.; Kinoshita, Ryo; Yang, Yichi; Hayashi, Katsuma; Kobayashi, Tetsuro; Yuan, Baoyin; Akhmetzhanov, Andrei R.	Journal of Clinical Medicine
Return of the Coronavirus: 2019-nCoV	10.3390/v12020135	2020-01-24	2020-01-24	2020-01-21	2020-01-24	Commentary		Gralinski, E. Lisa; Menachery, D. Vineet	Viruses
China coronavirus: what do we know so far?	10.1136/bmj.m308	2020-01-24	2020-01-24			News Item		Mahase, E.	BMJournal (Clinical research ed.)
A Novel Coronavirus from Patients with Pneumonia in China, 2019	10.1056/NEJMoa2001017	2020-01-24				Research	updated on 29.jan.2020	Zhu, N.; Zhang, D.; Wang, W.; Li, X.; Yang, B.; Song, J.; Zhao, X.; Huang, B.; Shi, W.; Lu, R.; Niu, P.; Zhan, F.; Ma, X.; Wang, D.; Xu, W.; Wu, G.; Gao, G. F.; Tan, W.	The New England journal of medicine
Data sharing and outbreaks: best practice exemplified	10.1016/S0140-6736(20)30184-7	2020-01-24				Commentary		Heymann, David L.	The Lancet
Wuhan novel coronavirus 2019nCoV	10.31646/gbio.50	2020-01-24	2020-01-24			News Item		MacIntyre, C Raina	Global Biosecurity
Emerging understandings of 2019-nCoV	10.1016/S0140-6736(20)30186-0	2020-01-24	2020-01-23			Editorial		The Lancet	Lancet
Another Decade, Another Coronavirus	10.1056/NEJMe2001126	2020-01-24	2020-01-24			Editorial		Perlman, S.	The New England journal of medicine
A Novel Coronavirus Emerging in China - Key Questions for Impact Assessment	10.1056/NEJMp2000929	2020-01-24	2020-01-24			Perspective		Munster, V. J.; Koopmans, M.; van Doremalen, N.; van Riel, D.; de Wit, E.	The New England journal of medicine
Coronavirus infections and immune responses	10.1002/jmv.25685	2020-01-25	2020-01-16	2020-01-21	2020-01-22	Review		Geng Li, Yaohua Fan, Yanni Lai, Tiantian Han, Zonghui Li, Peiwen Zhou, Pan Pan, Wenbiao Wang, Dingwen Hu, Xiaohong Liu, Qiwei Zhang, Jianguo Wu	Journal of Medical Virology
Early Transmissibility Assessment of a Novel Coronavirus in Wuhan, China	10.2139/ssrn.3524675	2020-01-26				Research		Majumder, Maimuna and Mandl, Kenneth D.	SSRN
Outbreak of a novel coronavirus	10.1038/s41579-020-0332-0	2020-01-27				Research Highlight		Du Toit, A.	Nature reviews. Microbiology
China’s response to a novel coronavirus stands in stark contrast to the 2002 SARS outbreak response	10.1038/s41591-020-0771-1	2020-01-27	2020-01-20			Commentary		Nkengasong, J.	Nature Medicine
Emergence of a novel coronavirus causing respiratory illness from Wuhan, China	10.1016/j.jinf.2020.01.014	2020-01-27	2020-01-17		2020-01-21	Commentary		Tang, Julian W.; Tambyah, Paul A.; Hui, David S.C.	Journal of Infection
Potential for global spread of a novel coronavirus from China	10.1093/jtm/taaa011	2020-01-27		2020-01-22	2020-01-27	Commentary		Bogoch, I. I.; Watts, A.; Thomas-Bachli, A.; Huber, C.; Kraemer, M. U. G.; Khan, K.	Journal of travel medicine
Can an anti-HIV combination or other existing drugs outwit the new coronavirus?	10.1126/science.abb0659	2020-01-27	2020-01-27			News Item		Cohen, Jon	Science
Covid-19 — Navigating the Uncharted	10.1056/NEJMe2002387	2020-01-28	2020-01-26			Editorial		Fauci, Anthony S.; Lane, H. Clifford; Redfield, Robert R.	New England Journal of Medicine
Genomic characterization of the 2019 novel human-pathogenic coronavirus isolated from a patient with atypical pneumonia after visiting Wuhan	10.1080/22221751.2020.1719902	2020-01-28		2020-01-16	2020-01-17	Research		Chan, J. F. Auid-Orcid https orcid org; Kok, K. H. Auid-Orcid https orcid org X.; Zhu, Z.; Chu, H.; To, K. K.; Yuan, S.; Yuen, K. Y.	Emerging Microbes & Infections
A mathematical model for simulating the phase-based transmissibility of a novel coronavirus	10.1186/s40249-020-00640-3	2020-01-28	2020-01-01	2020-01-28	2020-01-18	Research		['Chen, Tian-Mu', 'Rui, Jia', 'Wang, Qiu-Peng', 'Zhao, Ze-Yu', 'Cui, Jing-An', 'Yin, Ling']	Infect Dis Poverty
China coronavirus: mild but infectious cases may make it hard to control outbreak, report warns	10.1136/bmj.m325	2020-01-28	2020-01-28			News Item		Mahase, Elisabeth	BMJ
Chinese premier rallies medics in coronavirus fight	10.1136/bmj.m343	2020-01-28	2020-01-27			News Item		Moberly, Tom	BMJ
Importation and Human-to-Human Transmission of a Novel Coronavirus in Vietnam	10.1056/NEJMc2001272	2020-01-28	2020-01-28			Case study		Phan, Lan T.; Nguyen, Thuong V.; Luong, Quang C.; Nguyen, Thinh V.; Nguyen, Hieu T.; Le, Hung Q.; Nguyen, Thuc T.; Cao, Thang M.; Pham, Quang D.	New England Journal of Medicine
Drug treatment options for the 2019-new coronavirus (2019-nCoV)	10.5582/bst.2020.01020	2020-01-28	2020-01-22	2020-01-23	2020-01-27	Commentary		Lu, Hongzhou	BioScience TrendsAB - As of January 22, 2020, a total of 571 cases of the 2019-new coronavirus (2019-nCoV) have been reported in 25 provinces (districts and cities) in China. At present, there is no vaccine or antiviral treatment for human and animal coro
The coronavirus outbreak: the central role of primary care in emergency preparedness and response	10.3399/bjgpopen20X101041	2020-01-28	2020-01-22	2020-01-27	2020-01-27	Commentary		Dunlop, C.; Howe, A.; Li, D.; Allen, L. N.	BJGP open
The psychological effects of quarantining a city	10.1136/bmj.m313	2020-01-28				Commentary		Rubin, G. James; Wessely, Simon	BMJ
The novel coronavirus (2019-nCoV) outbreak: Think the unthinkable and be prepared to face the challenge	10.1515/dx-2020-0015	2020-01-28				Commentary		Lippi, G.; Plebani, M.	Diagnosis
Full-genome evolutionary analysis of the novel corona virus (2019-nCoV) rejects the hypothesis of emergence as a result of a recent recombination event	10.1016/j.meegid.2020.104212	2020-01-29	2020-01-25	2020-01-27	2020-01-28	Research		Paraskevis, D.; Kostaki, E.G.; Magiorkinis, G.; Panayiotakopoulos, G.; Sourvinos, G.; Tsiodras, S.	Infection, Genetics and Evolution
A novel coronavirus outbreak of global health concern - Comment - Correction	10.1016/S0140-6736(20)30250-6	2020-01-29				Correction		Chen Wang, Peter W Horby, Frederick G Hayden, George F Gao	The Lancet
Genomic characterisation and epidemiology of 2019 novel coronavirus: implications for virus origins and receptor binding	10.1016/S0140-6736(20)30251-8	2020-01-29	2020-01-26			Research		Lu, Roujian; Zhao, Xiang; Li, Juan; Niu, Peihua; Yang, Bo; Wu, Honglong; Wang, Wenling; Song, Hao; Huang, Baoying; Zhu, Na; Bi, Yuhai; Ma, Xuejun; Zhan, Faxian; Wang, Liang; Hu, Tao; Zhou, Hong; Hu, Zhenhong; Zhou, Weimin; Zhao, Li; Chen, Jing; Meng, Yao; Wang, Ji; Lin, Yang; Yuan, Jianying; Xie, Zhihao; Ma, Jinmin; Liu, William J.; Wang, Dayan; Xu, Wenbo; Holmes, Edward C.; Gao, George F.; Wu, G…	The Lancet
Epidemiological and clinical characteristics of 99 cases of 2019 novel coronavirus pneumonia in Wuhan, China: a descriptive study	10.1016/S0140-6736(20)30211-7	2020-01-29	2020-01-25			Case study	2020.01.20-ig vettek be embereket a vizsgálatba
Updated understanding of the outbreak of 2019 novel coronavirus (2019‐nCoV) in Wuhan, China	10.1002/jmv.25689	2020-01-29	2020-01-26			Research		Wang, Weier; Tang, Jianming; Wei, Fangqiang	Journal of Medical Virology
The 2019‐new coronavirus epidemic: Evidence for virus evolution	10.1002/jmv.25688	2020-01-29		2020-01-25	2020-01-27			Benvenuto, Domenico; Giovanetti, Marta; Ciccozzi, Alessandra; Spoto, Silvia; Angeletti, Silvia; Ciccozzi, Massimo	Journal of Medical Virology
China coronavirus: partial border closures into Hong Kong are not enough, say doctors	10.1136/bmj.m349	2020-01-29	2020-01-28			News Item		Parry, Jane	BMJ
Early Transmission Dynamics in Wuhan, China, of Novel Coronavirus–Infected Pneumonia	10.1056/NEJMoa2001316	2020-01-29	2020-01-22			Case study	updated on 31.jan.2020	Li, Qun; Guan, Xuhua; Wu, Peng; Wang, Xiaoye; Zhou, Lei; Tong, Yeqing; Ren, Ruiqi; Leung, Kathy S. M.; Lau, Eric H. Y.; Wong, Jessica Y.; Xing, Xuesen; Xiang, Nijuan; Wu, Yang; Li, Chao; Chen, Qi; Li, Dan; Liu, Tian; Zhao, Jing; Li, Man; Tu, Wenxiao; Chen, Chuding; Jin, Lianmei; Yang, Rui; Wang, Qi; Zhou, Suhua; Wang, Rui; Liu, Hui; Luo, Yingbo; Liu, Yuan; Shao, Ge; Li, Huan; Tao, Zhongfa; Yang, …	New England Journal of Medicine
Wuhan: Britons to be evacuated as scientists estimate 44 000 cases of 2019-nCOV in the city	10.1136/bmj.m351	2020-01-29	2020-01-27			News Item		Parry, J.	BMJournal (Clinical research ed.)
Novel coronavirus: From discovery to clinical diagnostics	10.1016/j.meegid.2020.104211	2020-01-30	2020-01-26	2020-01-26	2020-01-28	Opinion		Phan, Tung	Infection, Genetics and Evolution
Potential of large "first generation" human-to-human transmission of 2019-nCoV	10.1002/jmv.25693	2020-01-30	2020-01-19	2020-01-24	2020-01-27	Research		Li, X.; Zai, J.; Wang, X.; Li, Y.	Journal of medical virology
Transmission of 2019-nCoV Infection from an Asymptomatic Contact in Germany	10.1056/NEJMc2001468	2020-01-30	2020-01-29			Case study	updated on 6.feb.2020	Rothe, C.; Schunk, M.; Sothmann, P.; Bretzel, G.; Froeschl, G.; Wallrauch, C.; Zimmer, T.; Thiel, V.; Janke, C.; Guggemos, W.; Seilmaier, M.; Drosten, C.; Vollmar, P.; Zwirglmaier, K.; Zange, S.; Wolfel, R.; Hoelscher, M.	The New England journal of medicine
Note from the editors: World Health Organization declares novel coronavirus (2019-nCoV) sixth public health emergency of international concern	10.2807/1560-7917.ES.2020.25.5.200131e	2020-01-30				Editorial			Eurosurveillance
Drug firms mobilize to combat novel coronavirus outbreak		2020-01-30	2020-01-30			News Item			C&EN Global Enterprise
Novel coronavirus (2019-nCoV) early-stage importation risk to Europe, January 2020	10.2807/1560-7917.ES.2020.25.4.2000057	2020-01-30	2020-01-27	2020-01-23	2020-01-30	Research		['Pullano, Giulia', 'Pinotti, Francesco', 'Valdano, Eugenio', 'Boëlle, Pierre-Yves', 'Poletto, Chiara', 'Colizza, Vittoria']	Eurosurveillance
Pattern of early human-to-human transmission of Wuhan 2019 novel coronavirus (2019-nCoV), December 2019 to January 2020	10.2807/1560-7917.ES.2020.25.4.2000058	2020-01-30	2020-01-29	2020-01-24	2020-01-30	Research		['Riou, Julien', 'Althaus, Christian L.']	Eurosurveillance
Following the evidence, from coronavirus to terrorism response	10.1136/bmj.m344	2020-01-30				Commentary		Moberly, Tom	BMJ
Preliminary estimation of the basic reproduction number of novel coronavirus (2019-nCoV) in China, from 2019 to 2020: A data-driven analysis in the early phase of the outbreak	10.1016/j.ijid.2020.01.050	2020-01-30	2020-01-24	2020-01-23	2020-01-27	Research		Zhao, Shi; Lin, Qianyin; Ran, Jinjun; Musa, Salihu S.; Yang, Guangpu; Wang, Weiming; Lou, Yijun; Gao, Daozhou; Yang, Lin; He, Daihai; Wang, Maggie H.	International Journal of Infectious Diseases
The Fight against the 2019-nCoV Outbreak: an Arduous March Has Just Begun	10.3346/jkms.2020.35.e56	2020-01-30	2020-01-29	2020-01-29	2020-01-30	Editorial		Yoo, Jin-Hong	Journal Korean Med Sci
The Novel Coronavirus Originating in Wuhan, China: Challenges for Global Health Governance	10.1001/jama.2020.1097	2020-01-30	2020-01-28			Commentary		Phelan, A. L.; Katz, R.; Gostin, L. O.	Jama
Identification of potential cross-protective epitope between 2019-nCoV and SARS virus	10.1016/j.jgg.2020.01.003	2020-01-30		2020-01-23	2020-01-26	Research		Qiu, Tianyi; Mao, Tiantian; Wang, Yuan; Zhou, Mengdi; Qiu, Jingxuan; Wang, Jianwei; Xu, Jianqing; Cao, Zhiwei	Journal of Genetics and Genomics
Emergence of SARS-like Coronavirus poses new challenge in China	10.1016/j.jinf.2020.01.017	2020-01-30	2020-01-22		2020-01-25	Commentary		Wang, Ruichen; Zhang, Xu; Irwin, David M.; Shen, Yongyi	Journal of Infection
SARS-CoV, MERS-CoV and now the 2019-novel CoV: Have we investigated enough about coronaviruses? – A bibliometric analysis	10.1016/j.tmaid.2020.101566	2020-01-30	2020-01-30	2020-01-25	2020-01-28	Correspondence		Bonilla-Aldana, D. Katterine; Quintero-Rada, Keidenis; Montoya-Posada, Juan Pablo; Ramírez, Sebastian; Paniz-Mondolfi, Alberto; Rabaan, Ali; Sah, Ranjit; Rodríguez-Morales, Alfonso J.	Travel Medicine and Infectious Disease
The next big threat to global health? 2019 novel coronavirus (2019-nCoV): What advice can we give to travellers? – Interim recommendations January 2020, from the Latin-American society for Travel Medicine (SLAMVI)	10.1016/j.tmaid.2020.101567	2020-01-30		2020-01-28	2020-01-28	Editorial		Biscayart, Cristian; Angeleri, Patricia; Lloveras, Susana; Chaves, Tânia do Socorro Souza; Schlagenhauf, Patricia; Rodríguez-Morales, Alfonso J.	Travel Medicine and Infectious Disease
The association between domestic train transportation and novel coronavirus (2019-nCoV) outbreak in China from 2019 to 2020: A data-driven correlational report	10.1016/j.tmaid.2020.101568	2020-01-30		2020-01-22	2020-01-28	Correspondence		Zhao, Shi; Zhuang, Zian; Ran, Jinjun; Lin, Jiaer; Yang, Guangpu; Yang, Lin; He, Daihai	Travel medicine and infectious disease
Nowcasting and forecasting the potential domestic and international spread of the 2019-nCoV outbreak originating in Wuhan, China: a modelling study	10.1016/S0140-6736(20)30260-9	2020-01-31	2020-01-28			Research		Wu, Joseph T.; Leung, Kathy; Leung, Gabriel M.	The Lancet
2019-nCoV (Wuhan virus), a novel Coronavirus: human-to-human transmission, travel-related cases, and vaccine readiness	10.3855/jidc.12425	2020-01-31		2020-01-20	2020-01-23	Research	2020.01.28 az as of date	Ralph, R.; Lew, J.; Zeng, T.; Francis, M.; Xue, B.; Roux, M.; Ostadgavahi, A. T.; Rubino, S.; Dawe, N. J.; Al-Ahdal, M. N.; Kelvin, D. J.; Richardson, C. D.; Kindrachuk, J.; Falzarano, D.; Kelvin, A. A.	Journal of Infection in Developing Countries
An emerging coronavirus causing pneumonia outbreak in Wuhan, China: calling for developing therapeutic and prophylactic strategies	10.1080/22221751.2020.1723441	2020-01-31		2020-01-20	2020-01-21	Commentary		['Jiang, Shibo', 'Du, Lanying', 'Shi, Zhengli']	Emerg Microbes Infect
Fear of the novel coronavirus	10.3855/jidc.12496	2020-01-31	2020-01-28	2020-01-30	2020-01-30	Editorial		David J Kelvin	Journal of Infection in Deveveloping Countries
Coronavirus shows how UK must act quickly before being shut out of Europe’s health protection systems	10.1136/bmj.m400	2020-01-31	2020-01-31			Commentary		Flear, Mark; de Ruijter, Anniek; McKee, Martin	BMJ
Response to the emerging novel coronavirus outbreak	10.1136/bmj.m406	2020-01-31	2020-01-31			Editorial		Kickbusch, I.; Leung, G.	BMJournal (Clinical research ed.)
China coronavirus: WHO declares international emergency as death toll exceeds 200	10.1136/bmj.m408	2020-01-31	2020-01-31			News Item		Mahase, Elisabeth	BMJ
First Case of 2019 Novel Coronavirus in the United States	10.1056/NEJMoa2001191	2020-01-31	2020-01-30			Case Study		Holshue, Michelle L.; DeBolt, Chas; Lindquist, Scott; Lofy, Kathy H.; Wiesman, John; Bruce, Hollianne; Spitters, Christopher; Ericson, Keith; Wilkerson, Sara; Tural, Ahmet; Diaz, George; Cohn, Amanda; Fox, LeAnne; Patel, Anita; Gerber, Susan I.; Kim, Lindsay; Tong, Suxiang; Lu, Xiaoyan; Lindstrom, Steve; Pallansch, Mark A.; Weldon, William C.; Biggs, Holly M.; Uyeki, Timothy M.; Pillai, Satish K.	New England Journal of Medicine
Laboratory biosafety guide for the novel coronavirus	10.1016/j.bsheal.2020.01.001	2020-01-31				Recommendation		Department of Health Science, Technology; Education, National Health Commission of People's Republic of China	Biosafety and Health
Therapeutic strategies in an outbreak scenario to treat the novel coronavirus originating in Wuhan, China	10.12688/f1000research.22211.2	2020-01-31				Commentary	Updated on 7.Feb.2020	Kruse, Robert L.	F1000Research
Molecular Diagnosis of a Novel Coronavirus (2019-nCoV) Causing an Outbreak of Pneumonia	10.1093/clinchem/hvaa029	2020-01-31	2020-01-22	2020-01-22	2020-01-27	Research		Chu, Daniel K. W.; Pan, Yang; Cheng, Samuel M. S.; Hui, Kenrie P. Y.; Krishnan, Pavithra; Liu, Yingzhi; Ng, Daisy Y. M.; Wan, Carrie K. C.; Yang, Peng; Wang, Quanyi; Peiris, Malik; Poon, Leo L. M.	Clin Chem
The Novel Chinese Coronavirus (2019-nCoV) Infections: challenges for fighting the storm	10.1111/eci.13209	2020-01-31	2020-01-30			Editorial		Bassetti, M.; Vena, A.; Roberto Giacobbe, D.	European journal of clinical investigation
CT Imaging of the 2019 Novel Coronavirus (2019-nCoV) Pneumonia	10.1148/radiol.2020200236	2020-01-31		2020-01-29	2020-01-29	Case Study		Lei, J.; Li, J.; Li, X.; Qi, X.	Radiology
The 2019 Novel Coronavirus: A Crown Jewel of Pandemics?	10.2478/jccm-2020-0013	2020-01-31	2020-01-31	2020-01-31	2020-01-31	Editorial		Azamfirei, Razvan	Journal Crit Care Med (Targu Mures)
Coronavirus outbreak: what's next?	10.1038/d41586-020-00236-9	2020-01-31	2020-01-30			News Item	Clarification Feb.4	Lewis, Dyani	Nature
China coronavirus: labs worldwide scramble to analyse live samples	10.1038/d41586-020-00262-7	2020-01-31	2020-01-29			News Item		Callaway, Ewen	Nature
New coronavirus threat galvanizes scientists	10.1126/science.367.6477.492	2020-01-31				Commentary		Cohen, J.	Science
Measures for diagnosing and treating infections by a novel coronavirus responsible for a pneumonia outbreak originating in Wuhan, China	10.1016/j.micinf.2020.01.003	2020-02-01		2020-01-24	2020-01-24	Review/Commentary		Yu, Fei; Du, Lanying; Ojcius, David M.; Pan, Chungen; Jiang, Shibo	Microbes and Infection
Estimating the Unreported Number of Novel Coronavirus (2019-nCoV) Cases in China in the First Half of January 2020: A Data-Driven Modelling Analysis of the Early Outbreak	10.3390/jcm9020388	2020-02-01	2020-01-26	2020-01-27	2020-01-31	Research		Zhao, Shi; Musa, Salihu S.; Lin, Qianying; Ran, Jinjun; Yang, Guangpu; Wang, Weiming; Lou, Yijun; Yang, Lin; Gao, Daozhou; He, Daihai; Wang, Maggie H.	Journal of Clinical Medicine
Offline: 2019-nCoV outbreak&#x2014;early lessons	10.1016/S0140-6736(20)30212-9	2020-02-01				Commentary		Horton, Richard	The Lancet
A Novel Coronavirus Outbreak from Wuhan City in China, Rapid Need for Emergency Departments Preparedness and Response		2020-02-02		2020-02-01	2020-02-01	Letter to the editor		Alavi-Moghaddam, Mostafa	Archives of Academic Emergency Medicine
Emerging zoonoses: A one health challenge	10.1016/j.eclinm.2020.100300	2020-02-02				Editorial			EClinicalMedicine
Study claiming new coronavirus can be transmitted by people without symptoms was flawed	10.1126/science.abb1524	2020-02-03				News Item		Kai Kupferschmidt	Science
The First Case of 2019 Novel Coronavirus Pneumonia Imported into Korea from Wuhan, China: Implication for Infection Prevention and Control Measures	10.3346/jkms.2020.35.e61	2020-02-03	2020-01-25			Case study		['Kim, Jin Yong', 'Choe, Pyoeng Gyun', 'Oh, Yoonju', 'Oh, Kyung Joong', 'Kim, Jinsil', 'Park, So Jeong', 'Park, Ji Hye', 'Na, Hye Kyoung', 'Oh, Myoung-don']	Journal of Korean Medical Science
The Outbreak Cases with the Novel Coronavirus Suggest Upgraded Quarantine and Isolation in Korea	10.3346/jkms.2020.35.e62	2020-02-03		2020-02-01	2020-02-03	Case study	2020.02.06 az as of date	['Yoo, Jin-Hong', 'Hong, Sung-Tae']	Journal of Korean Medical Science
Communication, collaboration and cooperation can stop the 2019 coronavirus	10.1038/s41591-020-0775-x	2020-02-03				Editorial			Nature Medicine
A new coronavirus associated with human respiratory disease in China	10.1038/s41586-020-2008-3	2020-02-03		2020-01-07	2020-01-28	Research		Wu, Fan; Zhao, Su; Yu, Bin; Chen, Yan-Mei; Wang, Wen; Song, Zhi-Gang; Hu, Yi; Tao, Zhao-Wu; Tian, Jun-Hua; Pei, Yuan-Yuan; Yuan, Ming-Li; Zhang, Yu-Ling; Dai, Fa-Hui; Liu, Yi; Wang, Qi-Min; Zheng, Jiao-Jiao; Xu, Lin; Holmes, Edward C.; Zhang, Yong-Zhen	Nature
A pneumonia outbreak associated with a new coronavirus of probable bat origin	10.1038/s41586-020-2012-7	2020-02-03		2020-01-20	2020-01-29	Research		Zhou, Peng; Yang, Xing-Lou; Wang, Xian-Guang; Hu, Ben; Zhang, Lei; Zhang, Wei; Si, Hao-Rui; Zhu, Yan; Li, Bei; Huang, Chao-Lin; Chen, Hui-Dong; Chen, Jing; Luo, Yun; Guo, Hua; Jiang, Ren-Di; Liu, Mei-Qin; Chen, Ying; Shen, Xu-Rui; Wang, Xi; Zheng, Xiao-Shuang; Zhao, Kai; Chen, Quan-Jiao; Deng, Fei; Liu, Lin-Lin; Yan, Bing; Zhan, Fa-Xian; Wang, Yan-Yi; Xiao, Geng-Fu; Shi, Zheng-Li	Nature
Risk Management Analysis for Novel Coronavirus in Wuhan, China	10.3390/jrfm13020022	2020-02-03	2020-01-23	2020-02-01	2020-02-02	Editorial		Yue, Xiao-Guang; Shao, Xue-Feng; Li, Y. Rita; Crabbe, James C. M.; Mi, Lili; Hu, Siyan; Baker, S. Julien; Liang, Gang	Journal of Clinical Medicine
Imported cases of 2019-novel coronavirus (2019-nCoV) infections in Thailand: Mathematical modelling of the outbreak	10.4103/1995-7645.277516	2020-02-03	2020-01-31	2020-01-31	2020-01-31	Research		Wiwanitkit, Pathum Sookaromdee; Viroj	Asian Pacific Journal of Tropical Medicine
Origin and evolution of the 2019 novel coronavirus	10.1093/cid/ciaa112	2020-02-03	2020-01-23			Research		Liangsheng Zhang, Fu-ming Shen, Fei Chen, Zhenguo Lin	Clinical Infectious Diseases,
Travelers Give Wings to Novel Coronavirus (2019-nCoV)	10.1093/jtm/taaa015	2020-02-03	2020-01-30	2020-01-30	2020-01-31	Editorial		Wilson, Mary E.; Chen, Lin H.	Journal of Travel Medicine
Coronavirus in China	10.1016/S2213-2600(20)30056-4	2020-02-03				News Item		Burki, Talha Khan	The Lancet Respiratory Medicine
Asymptomatic cases in a family cluster with SARS-CoV-2 infection	10.1016/S1473-3099(20)30114-6	2020-02-04	2020-01-29			Case study		Pan, Xingfei; Chen, Dexiong; Xia, Yong; Wu, Xinwei; Li, Tangsheng; Ou, Xueting; Zhou, Liyang; Liu, Jing	The Lancet Infectious Diseases
Remdesivir and chloroquine effectively inhibit the recently emerged novel coronavirus (2019-nCoV) in vitro	10.1038/s41422-020-0282-0	2020-02-04		2020-01-25	2020-01-28	Research	As of 27.01.2020	Wang, Manli; Cao, Ruiyuan; Zhang, Leike; Yang, Xinglou; Liu, Jia; Xu, Mingyue; Shi, Zhengli; Hu, Zhihong; Zhong, Wu; Xiao, Gengfu	Cell Research
The Role of Augmented Intelligence (AI) in Detecting and Preventing the Spread of Novel Coronavirus	10.1007/s10916-020-1536-6	2020-02-04	2020-01-31			Editorial		Long, Justin B.; Ehrenfeld, Jesse M.	Journal of Medical Systems
China coronavirus: Hong Kong health staff strike to demand border closure as city records first death	10.1136/bmj.m454	2020-02-04	2020-02-03			News Item		Parry, Jane	BMJ
Updates on Wuhan 2019 novel coronavirus epidemic	10.1002/jmv.25695	2020-02-04		2020-01-28	2020-02-03	News Item		Kofi Ayittey, Foster; Dzuvor, Christian; Kormla Ayittey, Matthew; Bennita Chiwero, Nyasha; Habib, Ahmed	Journal of Medical Virology
Two groups use AI to find possible coronavirus drugs		2020-02-04				News Item			C&EN Global Enterprise
Coronavirus puts drug chemical industry on alert	10.1021/cen-09806-buscon2	2020-02-04				News Item			C&EN Global Enterprise
Should, and how can, exercise be done during a coronavirus outbreak? An interview with Dr. Jeffrey A. Woods	10.1016/j.jshs.2020.01.005	2020-02-04	2020-01-30	2020-01-24	2020-01-31	Commentary		Zhu, Weimo	Journal Sport Health Sci
The Rate of Underascertainment of Novel Coronavirus (2019-nCoV) Infection: Estimation Using Japanese Passengers Data on Evacuation Flights	10.3390/jcm9020419	2020-02-04	2020-02-02	2020-02-02	2020-02-03	Editorial		Nishiura, Hiroshi; Kobayashi, Tetsuro; Yang, Yichi; Hayashi, Katsuma; Miyama, Takeshi; Kinoshita, Ryo; Linton, Natalie M.; Jung, Sung-Mok; Yuan, Baoyin; Suzuki, Ayako; Akhmetzhanov, Andrei R.	Journal Clin Med
A precision medicine approach to managing Wuhan Coronavirus pneumonia	10.1093/pcmedi/pbaa002	2020-02-04	2020-01-29	2020-01-25	2020-01-31	Recommendation		Minjin Wang, Yanbing Zhou, Zhiyong Zong, Zongan Liang, Yu Cao, Hong Tang, Bin Song, Zixing Huang, Yan Kang, Ping Feng, Binwu Ying, Weimin Li	Precision Clinical Medicine
CT Imaging Features of 2019 Novel Coronavirus (2019-nCoV)	10.1148/radiol.2020200230	2020-02-04	2020-01-30	2020-01-28	2020-02-03	Case Study		Chung, Michael; Bernheim, Adam; Mei, Xueyan; Zhang, Ning; Huang, Mingqian; Zeng, Xianjian; Cui, Jiufa; Xu, Wenjian; Yang, Yang; Fayad, Zahi; Jacobi, Adam; Li, Kunwei; Li, Shaolin; Shan, Hong	Radiology
Chest CT Findings in 2019 Novel Coronavirus (2019-nCoV) Infections from Wuhan, China: Key Points for the Radiologist	10.1148/radiol.2020200241	2020-02-04		2020-01-29	2020-02-03	Perspective		Kanne, Jeffrey P.	Radiology
A new pandemic out of China: the Wuhan 2019-nCoV coronavirus syndrome	10.1016/j.hlpt.2020.02.001	2020-02-04	2020-02-07			Editorial		Singer, D. R. J.	Health Policy and Technology
Baricitinib as potential treatment for 2019-nCoV acute respiratory disease	10.1016/S0140-6736(20)30304-4	2020-02-04				Correspondance		Richardson, Peter; Griffin, Ivan; Tucker, Catherine; Smith, Dan; Oechsle, Olly; Phelan, Anne; Stebbing, Justin	The Lancet
Novel coronavirus is putting the whole world on alert	10.1016/j.jhin.2020.01.019	2020-02-04	2020-01-26	2020-01-28	2020-01-29	Commentary		Khan, S.; Ali, A.; Siddique, R.; Nabi, G.	Journal of Hospital Infection
Emerging threats from zoonotic coronaviruses-from SARS and MERS to 2019-nCoV	10.1016/j.jmii.2020.02.001	2020-02-04		2020-02-01	2020-02-01	Perspective		Lee, Ping-Ing; Hsueh, Po-Ren	Journal of Microbiology, Immunology and Infection
Wuhan coronavirus (2019-nCoV): The need to maintain regular physical activity while taking precautions	10.1016/j.jshs.2020.02.001	2020-02-04	2020-02-08	2020-02-02	2020-02-03	Opinion		Chen, Peijie; Mao, Lijuan; Nassis, George P.; Harmer, Peter; Ainsworth, Barbara E.; Li, Fuzhong	Journal of Sport and Health Science
2019_nCoV/SARS-CoV-2: rapid classification of betacoronaviruses and identification of Traditional Chinese Medicine as potential origin of zoonotic coronaviruses	10.1111/lam.13285	2020-02-04		2020-02-05	2020-02-11	Research		Wassenaar, T. M.; Zou, Y.	Letters in applied microbiology
Pathogenicity and Transmissibility of 2019-nCoV—A Quick Overview and Comparison with Other Emerging Viruses	10.1016/j.micinf.2020.01.004	2020-02-04	2020-01-27	2020-01-28	2020-01-29	Review		Chen, Jieliang	Microbes and Infection
Timely mental health care for the 2019 novel coronavirus outbreak is urgently needed	10.1016/S2215-0366(20)30046-8	2020-02-04				Commentary		Xiang, Yu-Tao; Yang, Yuan; Li, Wen; Zhang, Ling; Zhang, Qinge; Cheung, Teris; Ng, Chee H.	The Lancet Psychiatry
Outbreak of novel Corona Virus (2019-nCoV); implications for travelers to Pakistan?	10.1016/j.tmaid.2020.101571	2020-02-04	2020-01-13	2020-01-29	2020-02-03	Correspondence		Rahman Qureshi, Ubaid Ur; Saleem, Sadia; Khan, Aisha; Afzal, Muhammad Sohail; Ali, Muhammad Shahzad; Ahmed, Haroon	Travel Medicine and Infectious Disease
Calling all coronavirus researchers: keep sharing, stay open	10.1038/d41586-020-00307-x	2020-02-04				Editorial			Nature
Novel coronavirus: Australian GPs raise concerns about shortage of face masks	10.1136/bmj.m477	2020-02-05	2020-02-05			News Item		Mahase, Elisabeth	BMJ
A novel coronavirus (2019-nCoV) causing pneumonia-associated respiratory syndrome	10.1038/s41423-020-0372-4	2020-02-05	2020-02-01	2020-02-01	2020-02-01	Commentary		Jiang, Shibo; Xia, Shuai; Ying, Tianlei; Lu, Lu	Cellular & Molecular Immunology AB -The novel coronavirus was denoted as 2019-nCoV by WHO (https://www.who.int/emergencies/diseases/novel-coronavirus-2019) and the Wuhan pneumonia was named as novel coronavirus-infected pneumonia (NCIP) by Chinese scient
RNA based mNGS approach identifies a novel human coronavirus from two individual pneumonia cases in 2019 Wuhan outbreak	10.1080/22221751.2020.1725399	2020-02-05	2020-01-07	2020-01-27	2020-01-30	Research		['Chen, Liangjun', 'Liu, Weiyong', 'Zhang, Qi', 'Xu, Ke', 'Ye, Guangming', 'Wu, Weichen', 'Sun, Ziyong', 'Liu, Fang', 'Wu, Kailang', 'Zhong, Bo', 'Mei, Yi', 'Zhang, Wenxia', 'Chen, Yu', 'Li, Yirong', 'Shi, Mang', 'Lan, Ke', 'Liu, Yingle']	Emerg Microbes Infect
The first two cases of 2019-nCoV in Italy: Where they come from?	10.1002/jmv.25699	2020-02-05	2020-01-31			Research		Giovanetti, Marta; Benvenuto, Domenico; Angeletti, Silvia; Ciccozzi, Massimo	Journal of Medical Virology
China's chemical industry shadowed by the coronavirus		2020-02-05				News Item			C&EN Global Enterprise
SARS to novel coronavirus – old lessons and new lessons	10.1017/S0950268820000254	2020-02-05	2020-01-26			Review		Brian McCloskey, David L. Heymann	Epidemiology & Infection
China coronavirus should be on “everybody’s agenda,” says vaccine expert	10.1136/bmj.m476	2020-02-05				News Item		Mahase, Elisabeth	BMJ
The Novel Coronavirus: A Bird's Eye View	10.15171/ijoem.2020.1921	2020-02-05		2020-02-03	2020-02-04	Review		Habibzadeh, Parham; Stoneman, Emily K.	Int Journal Occup Environ Med
Novel coronavirus infection during the 2019–2020 epidemic: preparing intensive care units—the experience in Sichuan Province, China	10.1007/s00134-020-05954-2	2020-02-05	2020-01-31	2020-01-29	2020-01-29	Recommendation		Liao, Xuelian; Wang, Bo; Kang, Yan	Intensive Care Medicine
A strategy to prevent future pandemics similar to the 2019-nCoV outbreak	10.1016/j.bsheal.2020.01.003	2020-02-05		2020-01-27	2020-01-30	Recommendation		Daszak, Peter; Olival, Kevin J.; Li, Hongying	Biosafety and Health
Diagnosis and treatment of 2019 novel coronavirus infection in children: a pressing issue	10.1007/s12519-020-00344-6	2020-02-05	2020-01-30	2020-01-30	2020-02-01	Editorial		Shen, Kun-Ling; Yang, Yong-Hong	World Journal of Pediatrics
Diagnosis and treatment recommendations for pediatric respiratory infection caused by the 2019 novel coronavirus	10.1007/s12519-020-00345-5	2020-02-05	2020-01-31	2020-02-02	2020-02-02	Review		Chen, Zhi-Min; Fu, Jun-Fen; Shu, Qiang; Chen, Ying-Hu; Hua, Chun-Zhen; Li, Fu-Bang; Lin, Ru; Tang, Lan-Fang; Wang, Tian-Lin; Wang, Wei; Wang, Ying-Shuo; Xu, Wei-Ze; Yang, Zi-Hao; Ye, Sheng; Yuan, Tian-Ming; Zhang, Chen-Mei; Zhang, Yuan-Yuan	World Journal of Pediatrics
Reporting, Epidemic Growth, and Reproduction Numbers for the 2019 Novel Coronavirus (2019-nCoV) Epidemic	10.7326/M20-0358	2020-02-05	2020-02-03			Research		Tuite, Ashleigh R.; Fisman, David N.	Ann Intern Med
Novel coronavirus (2019-nCoV) update: What we know and what is unknown	10.4103/1995-7645.277795	2020-02-05	2020-02-03	2020-02-04	2020-02-04	Perspective		Fasina, Folorunso Oludayo	Asian Pacific Journal of Tropical Medicine
Learning from the Past: Possible Urgent Prevention and Treatment Options for Severe Acute Respiratory Infections Caused by 2019-nCoV	10.1002/cbic.202000047	2020-02-05		2020-01-28		Perspective		Morse, J. S.; Lalonde, T.; Xu, S.; Liu, W. R.	ChemBioChem
Reducing mortality from 2019-nCoV: host-directed therapies should be an option	10.1016/S0140-6736(20)30305-6	2020-02-05				Correspondance		Zumla, Alimuddin; Hui, David S.; Azhar, Esam I.; Memish, Ziad A.; Maeurer, Markus	The Lancet
2019 Novel Coronavirus—Important Information for Clinicians	10.1001/jama.2020.1490	2020-02-05	2020-02-04			Commentary		del Rio, Carlos; Malani, Preeti N.	JAMA
Immunoinformatics-aided identification of T cell and B cell epitopes in the surface glycoprotein of 2019-nCoV	10.1002/jmv.25698	2020-02-05	2020-01-27	2020-01-30	2020-02-03	Research		Baruah, Vargab; Bose, Sujoy	Journal of Medical Virology
The mental health of medical workers in Wuhan, China dealing with the 2019 novel coronavirus	10.1016/S2215-0366(20)30047-X	2020-02-05	2020-01-27			Correspondance		Kang, Lijun; Li, Yi; Hu, Shaohua; Chen, Min; Yang, Can; Yang, Bing Xiang; Wang, Ying; Hu, Jianbo; Lai, Jianbo; Ma, Xiancang; Chen, Jun; Guan, Lili; Wang, Gaohua; Ma, Hong; Liu, Zhongchun	The Lancet Psychiatry
What goes on board aircraft? Passengers include Aedes, Anopheles, 2019-nCoV, dengue, Salmonella, Zika, et al	10.1016/j.tmaid.2020.101572	2020-02-05		2020-02-04	2020-02-04	Editorial		Wilson, Mary E.	Travel Medicine and Infectious Disease
‘This beast is moving very fast.’ Will the new coronavirus be contained—or go pandemic?	10.1126/science.abb1701	2020-02-05				News Item		Cohen, Kai Kupferschmidt; Jon	Science
Transmission dynamics and evolutionary history of 2019-nCoV	10.1002/jmv.25701	2020-02-06	2020-01-28	2020-02-01	2020-02-05	Research		Li, Xingguang; Wang, Wei; Zhao, Xiaofang; Zai, Junjie; Zhao, Qiang; Li, Yi; Chaillon, Antoine	Journal of Medical Virology
Effectiveness of airport screening at detecting travellers infected with novel coronavirus (2019-nCoV)	10.2807/1560-7917.ES.2020.25.5.2000080	2020-02-06	2020-02-04	2020-01-30	2020-02-06	Research	Corrected, Figure 2 was replaced on 7 February 2020.	['Quilty, Billy J', 'Clifford, Sam', None, 'Flasche, Stefan', 'Eggo, Rosalind M']	Eurosurveillance
Incubation period of 2019 novel coronavirus (2019-nCoV) infections among travellers from Wuhan, China, 20–28 January 2020	10.2807/1560-7917.ES.2020.25.5.2000062	2020-02-06	2020-01-29	2020-01-27	2020-02-06	Research		Backer, Jantien A; Klinkenberg, Don; Wallinga, Jacco	Eurosurveillance
An interim review of the epidemiological characteristics of 2019 novel coronavirus	10.4178/epih.e2020006	2020-02-06		2020-02-03	2020-02-06	Review		['Ryu, Sukhyun', 'Chun, Byung Chul', None]	Epidemiol Health
Revisiting the dangers of the coronavirus in the ophthalmology practice	10.1038/s41433-020-0790-7	2020-02-06	2020-01-23	2020-01-25	2020-01-27	Editorial		Seah, Ivan; Su, Xinyi; Lingam, Gopal	Eye
Coronavirus: doctor who faced backlash from police after warning of outbreak dies	10.1136/bmj.m528	2020-02-06				News Item		Mahase, Elisabeth	BMJ
A rapid advice guideline for the diagnosis and treatment of 2019 novel coronavirus (2019-nCoV) infected pneumonia (standard version)	10.1186/s40779-020-0233-6	2020-02-06	2020-01-26	2020-01-29	2020-01-30	Recommendation		Jin, Ying-Hui; Cai, Lin; Cheng, Zhen-Shun; Cheng, Hong; Deng, Tong; Fan, Yi-Pin; Fang, Cheng; Huang, Di; Huang, Lu-Qi; Huang, Qiao; Han, Yong; Hu, Bo; Hu, Fen; Li, Bing-Hui; Li, Yi-Rong; Liang, Ke; Lin, Li-Kai; Luo, Li-Sha; Ma, Jing; Ma, Lin-Lu; Peng, Zhi-Yong; Pan, Yun-Bao; Pan, Zhen-Yu; Ren, Xue-Qun; Sun, Hui-Min; Wang, Ying; Wang, Yun-Yun; Weng, Hong; Wei, Chao-Jie; Wu, Dong-Fang; Xia, Jian; X…	Military Medical Research
Imaging changes in patients with 2019-nCov	10.1007/s00330-020-06713-z	2020-02-06	2020-01-30	2020-01-30	2020-02-04	Case Study		Pan, Yueying; Guan, Hanxiong	European Radiology
2019 Novel Coronavirus (2019-nCoV) Pneumonia	10.1148/radiol.2020200257	2020-02-06	2020-01-27	2020-02-02	2020-02-05	Case Study		Liu, Peng; Tan, Xian-Zheng	Radiology
Emerging Coronavirus 2019-nCoV Pneumonia	10.1148/radiol.2020200274	2020-02-06	2020-01-27	2020-02-02	2020-02-05	Case Study		Song, Fengxiang; Shi, Nannan; Shan, Fei; Zhang, Zhiyong; Shen, Jie; Lu, Hongzhou; Ling, Yun; Jiang, Yebin; Shi, Yuxin	Radiology
2019-nCoV epidemic: what about pregnancies?	10.1016/S0140-6736(20)30311-1	2020-02-06				Correspondance		Favre, Guillaume; Pomar, Léo; Musso, Didier; Baud, David	The Lancet
Persistence of coronaviruses on inanimate surfaces and their inactivation with biocidal agents	10.1016/j.jhin.2020.01.022	2020-02-06	2020-01-28	2020-01-31	2020-01-31	Review		Kampf, G.; Todt, D.; Pfaender, S.; Steinmann, E.	Journal of Hospital Infection
Genomic variance of the 2019-nCoV coronavirus	10.1002/jmv.25700	2020-02-06	2020-02-02	2020-02-02	2020-02-05	Research		Ceraolo, Carmine; Giorgi, Federico M.	Journal of Medical Virology
2019-nCoV in context: lessons learned?	10.1016/S2542-5196(20)30035-8	2020-02-06				Commentary		Kock, Richard A.; Karesh, William B.; Veas, Francisco; Velavan, Thirumalaisamy P.; Simons, David; Mboera, Leonard E. G.; Dar, Osman; Arruda, Lia Bárbara; Zumla, Alimuddin	The Lancet Planetary Health
Coronavirus epidemic: preparing for extracorporeal organ support in intensive care	10.1016/S2213-2600(20)30060-6	2020-02-06				Spotlight		Ronco, Claudio; Navalesi, Paolo; Vincent, Jean Louis	The Lancet Respiratory Medicine
Coronavirus infections reported by ProMED, February 2000–January 2020	10.1016/j.tmaid.2020.101575	2020-02-06	2020-01-22	2020-01-27	2020-02-04	Research		Bonilla-Aldana, D. Katterine; Holguin-Rivera, Yeimer; Cortes-Bonilla, Isabella; Cardona-Trujillo, María C.; García-Barco, Alejandra; Bedoya-Arias, Hugo A.; Rabaan, Ali A.; Sah, Ranjit; Rodriguez-Morales, Alfonso J.	Travel Medicine and Infectious Disease
Evolving status of the 2019 novel coronavirus infection: Proposal of conventional serologic assays for disease diagnosis and infection monitoring	10.1002/jmv.25702	2020-02-07	2020-01-31	2020-02-01	2020-02-07	Commentary		Xiao, Shu-Yuan; Wu, Yingjie; Liu, Huan	Journal of Medical Virology
GSK and CEPI partner on coronavirus vaccine		2020-02-07				News Item			C&EN Global Enterprise
In Beijing, coronavirus 2019-nCoV has created a siege mentality	10.1136/bmj.m516	2020-02-07	2020-01-24			Correspondance		Mowbray, Heather	BMJ
2019-Novel Coronavirus (2019-nCoV): estimating the case fatality rate – a word of caution	10.4414/smw.2020.20203	2020-02-07	2020-02-07			Correspondence		Battegay, Manuel; Kuehl, Richard; Tschudin-Sutter, Sarah; Hirsch, Hans H.; Widmer, Andreas F.; Neher, Richard A.	Swiss Med Wkly
Clinical Characteristics of 138 Hospitalized Patients With 2019 Novel Coronavirus–Infected Pneumonia in Wuhan, Chin	10.1001/jama.2020.1585	2020-02-07	2020-02-03			Case study		Wang, Dawei; Hu, Bo; Hu, Chang; Zhu, Fangfang; Liu, Xing; Zhang, Jing; Wang, Binbin; Xiang, Hui; Cheng, Zhenshun; Xiong, Yong; Zhao, Yan; Li, Yirong; Wang, Xinghuan; Peng, Zhiyong	JAMA
Estimation of the Transmission Risk of the 2019-nCoV and Its Implication for Public Health Interventions	10.3390/jcm9020462	2020-02-07	2020-02-06	2020-01-31	2020-02-06	Research		Tang, Biao; Wang, Xia; Li, Qian; Bragazzi, Nicola Luigi; Tang, Sanyi; Xiao, Yanni; Wu, Jianhong	Journal of Clinical Medicine
Diagnosis, treatment, and prevention of 2019 novel coronavirus infection in children: experts' consensus statement	10.1007/s12519-020-00343-7	2020-02-07	2020-01-30	2020-01-29	2020-01-30	Review		Shen, Kunling; Yang, Yonghong; Wang, Tianyou; Zhao, Dongchi; Jiang, Yi; Jin, Runming; Zheng, Yuejie; Xu, Baoping; Xie, Zhengde; Lin, Likai; Shang, Yunxiao; Lu, Xiaoxia; Shu, Sainan; Bai, Yan; Deng, Jikui; Lu, Min; Ye, Leping; Wang, Xuefeng; Wang, Yongyan; Gao, Liwei; China National Clinical Research Center for Respiratory, Diseases; National Center for Children’s Health, Beijing China; Group of R…	World Journal Pediatr
Scientists are racing to model the next moves of a coronavirus that's still hard to predict	10.1126/science.abb2161	2020-02-07	2020-02-05			News Item		Cohen, Jon	Science
Racing towards the development of diagnostics for a novel coronavirus (2019-nCoV)	10.1093/clinchem/hvaa038	2020-02-07	2020-02-26	2020-02-01	2020-02-03	Editorial		Dennis Lo, Y. M.; Chiu, Rossa W. K.	Clin Chem
Compensation of ACE2 Function for Possible Clinical Management of 2019-nCoV-Induced Acute Lung Injury	10.1007/s12250-020-00205-6	2020-02-07		2020-02-01	2020-02-03	Perspective		Wu, Yuntao	Virol Sin
Clinical Features and Treatment of 2019-nCov Pneumonia Patients in Wuhan: Report of A Couple Cases	10.1007/s12250-020-00203-8	2020-02-07	2020-01-12	2020-01-25	2020-01-28	Case Study		Zhang, Zhan; Li, Xiaochen; Zhang, Wei; Shi, Zheng-Li; Zheng, Zhishui; Wang, Tao	Virologica Sinica
Evolution of CT Manifestations in a Patient Recovered from 2019 Novel Coronavirus (2019-nCoV) Pneumonia in Wuhan, China	10.1148/radiol.2020200269	2020-02-07		2020-02-01	2020-02-04	Case Study		Shi, Heshui; Han, Xiaoyu; Zheng, Chuansheng	Radiology
CT Manifestations of Two Cases of 2019 Novel Coronavirus (2019-nCoV) Pneumonia	10.1148/radiol.2020200280	2020-02-07		2020-02-03	2020-02-06	Case Study		Fang, Yicheng; Zhang, Huangqi; Xu, Yunyu; Xie, Jicheng; Pang, Peipei; Ji, Wenbin	Radiology
A data driven time-dependent transmission rate for tracking an epidemic: a case study of 2019-nCoV	10.1016/j.scib.2020.02.005	2020-02-07	2020-02-06			Research		Huang, Norden E.; Qiao, Fangli	Science Bulletin
Dose prediction of lopinavir/ritonavir for 2019-novel coronavirus (2019-nCoV) infection based on mathematic modeling	10.4103/1995-7645.277815	2020-02-07		2020-02-04	2020-02-04	Commentary		Wiwanitkit, Sora Yasri; Viroj	Asian Pacific Journal of Tropical Medicine
Genome Composition and Divergence of the Novel Coronavirus (2019-nCoV) Originating in China	10.1016/j.chom.2020.02.001	2020-02-07	2020-01-12			Research		Wu, Aiping; Peng, Yousong; Huang, Baoying; Ding, Xiao; Wang, Xianyue; Niu, Peihua; Meng, Jing; Zhu, Zhaozhong; Zhang, Zheng; Wang, Jiangyuan; Sheng, Jie; Quan, Lijun; Xia, Zanxian; Tan, Wenjie; Cheng, Genhong; Jiang, Taijiao	Cell Host & Microbe
Strengthening ICU health security for a coronavirus epidemic	10.1016/j.iccn.2020.102812	2020-02-07				Editorial		Jansson, Miia; Liao, Xuelian; Rello, Jordi	Intensive and Critical Care Nursing
Finding an Accurate Early Forecasting Model from Small Dataset: A Case of 2019-nCoV Novel Coronavirus Outbreak	10.9781/ijimai.2020.02.002	2020-02-07		2020-02-05	2020-02-07	Research		Fong, Simon James; Li, Gloria; Dey, Nilanjan; Gonzalez-Crespo, Rubén; Herrera-Viedma, Enrique	International Journal of Interactive Multimedia and Artificial Intelligence
A contingency plan for the management of the 2019 novel coronavirus outbreak in neonatal intensive care units	10.1016/S2352-4642(20)30040-7	2020-02-07	2020-02-05			Commentary		Jianhui Wang, Hongbo Qi, Lei Bao, Fang Li, Yuan Shi	The Lancet Child & Adolescent Health
Epidemiologic and Clinical Characteristics of Novel Coronavirus Infections Involving 13 Patients Outside Wuhan, China	10.1001/jama.2020.1623	2020-02-07	2020-02-04			Case Study		Chang, De; Lin, Minggui; Wei, Lai; Xie, Lixin; Zhu, Guangfa; Dela Cruz, Charles S.; Sharma, Lokesh	JAMA
Did pangolins spread the China coronavirus to people?	10.1038/d41586-020-00364-2	2020-02-07	2020-02-07			News Item		Cyranoski, David	Nature
Pandemic potential of 2019-nCoV	10.1016/S1473-3099(20)30068-2	2020-02-07				Correspondance		Thompson, Robin	The Lancet Infectious Diseases
Australian Government releases face masks to protect against coronavirus	10.1016/S2213-2600(20)30064-3	2020-02-07				News Item		Kirby, Tony	The Lancet Respiratory Medicine
Maps, masks and media – Traveller and practitioner resources for 2019 novel coronavirus (2019-nCoV) acute respiratory virus	10.1016/j.tmaid.2020.101574	2020-02-07		2020-02-04	2020-02-04	Correspondence		Chiodini, Jane	Travel Medicine and Infectious Disease
Coronavirus 2019-nCoV: Is the genie already out of the bottle?	10.1016/j.tmaid.2020.101577	2020-02-07	2020-02-05	2020-02-05	2020-02-06	Correspondence		Hanscheid, Thomas; Valadas, Emília; Grobusch, Martin P.	Travel Medicine and Infectious Disease
Will novel virus go pandemic or be contained?	10.1126/science.367.6478.610	2020-02-07	2020-02-04			Commentary		Kupferschmidt, Kai; Cohen, Jon	Science
What next for the coronavirus response?	10.1016/S0140-6736(20)30292-0	2020-02-08				Editorial		Zarocostas, John	The Lancet
Offline: 2019-nCoV—“A desperate plea”	10.1016/S0140-6736(20)30299-3	2020-02-08				Commentary		Horton, Richard	The Lancet
What to do next to control the 2019-nCoV epidemic?	10.1016/S0140-6736(20)30300-7	2020-02-08	2020-02-04			Commentary		Wang, Fu-Sheng; Zhang, Chao	The Lancet
Public responses to the novel 2019 coronavirus (2019-nCoV) in Japan: mental health consequences and target populations	10.1111/pcn.12988	2020-02-08	2020-02-03	2020-02-07	2020-02-07	Commentary		Shigemura, Jun; Ursano, Robert J.; Morganstein, Joshua C.; Kurosawa, Mie; Benedek, David M.	Psychiatry and Clinical Neurosciences
Emerging novel Coronavirus (2019-nCoV) - Current scenario, evolutionary perspective based on genome analysis and recent developments	10.1080/01652176.2020.1727993	2020-02-08	2020-02-04	2020-02-03	2020-02-06	Research		Malik, Yashpal Singh; Sircar, Shubhankar; Bhat, Sudipta; Sharun, Khan; Dhama, Kuldeep; Dadar, Maryam; Tiwari, Ruchi; Chaicumpa, Wanpen	Veterinary Quarterly
Going global – Travel and the 2019 novel coronavirus	10.1016/j.tmaid.2020.101578	2020-02-08		2020-02-06	2020-02-07	Commentary		Rodríguez-Morales, Alfonso J.; MacGregor, Kirsten; Kanagarajah, Sanch; Patel, Dipti; Schlagenhauf, Patricia	Travel Medicine and Infectious Disease
Clinical and biochemical indexes from 2019-nCoV infected patients linked to viral loads and lung injury	10.1007/s11427-020-1643-8	2020-02-09	2020-01-23	2020-02-05	2020-02-08	Case Study		Liu, Yingxia; Yang, Yang; Zhang, Cong; Huang, Fengming; Wang, Fuxiang; Yuan, Jing; Wang, Zhaoqin; Li, Jinxiu; Li, Jianming; Feng, Cheng; Zhang, Zheng; Wang, Lifei; Peng, Ling; Chen, Li; Qin, Yuhao; Zhao, Dandan; Tan, Shuguang; Yin, Lu; Xu, Jun; Zhou, Congzhao; Jiang, Chengyu; Liu, Lei	Science China Life Sciences
Bat origin of a new human coronavirus: there and back again	10.1007/s11427-020-1645-7	2020-02-09		2020-02-06	2020-02-08	Commentary		Li, Xiang; Song, Yuhe; Wong, Gary; Cui, Jie	Science China Life Sciences
Clinical characteristics and therapeutic procedure for four cases with 2019 novel coronavirus pneumonia receiving combined Chinese and Western medicine treatment	10.5582/bst.2020.01030	2020-02-09	2020-02-05	2020-02-05	2020-02-06	Case Study	Corrected March 17	Wang, Zhenwei; Chen, Xiaorong; Lu, Yunfei; Chen, Feifei; Zhang, Wei	BioScience Trends
Epidemiologic characteristics of early cases with 2019 novel coronavirus (2019-nCoV) disease in Republic of Korea	10.4178/epih.e2020007	2020-02-09	2020-02-10	2020-02-08	2020-02-09	Research		Ki, Moran; nCoV, Task Force For	Epidemiol Health
COVID-19 (Novel Coronavirus 2019) - recent trends	10.26355/eurrev_202002_20378	2020-02-09				Review		Kannan, S.; Shaik Syed Ali, P.; Sheeza, A.; Hemalatha, K.	European review for medical and pharmacological sciences
African nations step up efforts to prevent spread of coronavirus		2020-02-10				News Item		Deborah Mackenzie	New Scientist
Coronavirus: NHS staff get power to keep patients in isolation as UK declares “serious threat”	10.1136/bmj.m550	2020-02-10	2020-02-10			News Item		Mahase, Elisabeth	BMJ
Coronavirus: global stocks of protective gear are depleted, with demand at “100 times” normal level, WHO warns	10.1136/bmj.m543	2020-02-10	2020-02-07			News Item		Mahase, Elisabeth	BMJ
First respiratory transmitted food borne outbreak?	10.1016/j.ijheh.2020.113490	2020-02-10	2020-02-10	2020-01-31	2020-02-10	Review		Jalava, Katri	Int Journal Hyg Environ Health
The spike glycoprotein of the new coronavirus 2019-nCoV contains a furin-like cleavage site absent in CoV of the same clade	10.1016/j.antiviral.2020.104742	2020-02-10		2020-02-03	2020-02-08	Research		Coutard, B.; Valle, C.; de Lamballerie, X.; Canard, B.; Seidah, N. G.; Decroly, E.	Antiviral Research
Therapeutic options for the 2019 novel coronavirus (2019-nCoV)	10.1038/d41573-020-00016-0	2020-02-10	2020-02-10			Commentary		Li, Guangdi; Clercq, Erik De	Nature Reviews Drug Discovery
Potential Maternal and Infant Outcomes from (Wuhan) Coronavirus 2019-nCoV Infecting Pregnant Women: Lessons from SARS, MERS, and Other Human Coronavirus Infections	10.3390/v12020194	2020-02-10	2020-02-09	2020-02-02	2020-02-09	Perspective		Schwartz, David A.; Graham, Ashley L.	Viruses
New coronavirus: new challenges for pediatricians	10.1007/s12519-020-00346-4	2020-02-10		2020-02-02	2020-02-02	Editorial		Chen, Zhi-Min; Fu, Jun-Fen; Shu, Qiang	World Journal of Pediatrics
Brief review of coronavirus for healthcare professionals February 10, 2020	10.13175/swjpcc011-20	2020-02-10	2020-02-10			Commentary		SA, Robbins RA; Klotz	Southwest Journal of Pulmonary and Critical Care
Coronaphobia: Fear and the 2019-nCoV Outbreak	10.1016/j.janxdis.2020.102196	2020-02-10	2020-02-08			Editorial		Asmundson, Gordon J. G.; Taylor, Steven	Journal of Anxiety Disorders
The first 2019 novel coronavirus case in Nepal	10.1016/S1473-3099(20)30067-0	2020-02-10	2020-02-01			Case Study		Bastola, Anup; Sah, Ranjit; Rodriguez-Morales, Alfonso J.; Lal, Bibek Kumar; Jha, Runa; Ojha, Hemant Chanda; Shrestha, Bikesh; Chu, Daniel K. W.; Poon, Leo L. M.; Costello, Anthony; Morita, Kouichi; Pandey, Basu Dev	The Lancet Infectious Diseases
Mission impossible? WHO director fights to prevent a pandemic without offending China Journal	10.1126/science.abb2477	2020-02-10				News Item	Updated on Feb.11	Kupferschmidt, Kai	Science
Fusion mechanism of 2019-nCoV and fusion inhibitors targeting HR1 domain in spike protein	10.1038/s41423-020-0374-2	2020-02-11		2020-02-03	2020-02-03	Research		Xia, Shuai; Zhu, Yun; Liu, Meiqin; Lan, Qiaoshuai; Xu, Wei; Wu, Yanling; Ying, Tianlei; Liu, Shuwen; Shi, Zhengli; Jiang, Shibo; Lu, Lu	Cellular & Molecular Immunology
Coronavirus: hospitals must learn from past pandemics	10.1038/d41586-020-00354-4	2020-02-11				Commentary		Nahid Bhadelia	Nature
Novel Coronavirus Outbreak in Wuhan, China, 2020: Intense Surveillance Is Vital for Preventing Sustained Transmission in New Locations	10.3390/jcm9020498	2020-02-11	2020-02-05	2020-01-25	2020-02-07	Research		Thompson, Robin N.	Journal Clin Med
Initial Cluster of Novel Coronavirus (2019-nCoV) Infections in Wuhan, China Is Consistent with Substantial Human-to-Human Transmission	10.3390/jcm9020488	2020-02-11		2020-02-10	2020-02-10	Editorial		Nishiura, Hiroshi; Linton, Natalie M.; Akhmetzhanov, Andrei R.	Journal of Clinical Medicine
Epidemiological research priorities for public health control of the ongoing global novel coronavirus (2019-nCoV) outbreak	10.2807/1560-7917.es.2020.25.6.2000110	2020-02-11	2020-02-10	2020-02-07	2020-02-10	Editorial		Cowling, Benjamin J; Leung, Gabriel M	Eurosurveillance
HRCT Imaging Features in Representative Imported Cases of 2019 Novel Coronavirus Pneumonia	10.1093/pcmedi/pbaa004	2020-02-11	2020-02-05	2020-02-05	2020-02-09	Case Study		Diao, Kaiyue; Han, Peilun; Pang, Tong; Li, Yuan; Yang, Zhigang	Precision Clinical Medicine
Novel coronavirus: how things are in Wuhan	10.1016/j.cmi.2020.02.005	2020-02-11		2020-01-30	2020-02-05	Commentary		Khan, S.; Nabi, G.; Han, G.; Siddique, R.; Lian, S.; Shi, H.; Bashir, N.; Ali, A.; Shereen, M. A.	Clinical Microbiology and Infection
An updated estimation of the risk of transmission of the novel coronavirus (2019-nCov)	10.1016/j.idm.2020.02.001	2020-02-11	2020-01-29	2020-02-02	2020-02-09	Research		['Tang, Biao', 'Bragazzi, Nicola Luigi', 'Li, Qian', 'Tang, Sanyi', 'Xiao, Yanni', 'Wu, Jianhong']	Infectious Disease Modelling
From Hendra to Wuhan: what has been learned in responding to emerging zoonotic viruses	10.1016/S0140-6736(20)30350-0	2020-02-11	2020-02-09			Commentary		Wang, Lin-Fa; Anderson, Danielle E.; Mackenzie, John S.; Merson, Michael H.	The Lancet
Early lessons from the frontline of the 2019-nCoV outbreak	10.1016/S0140-6736(20)30356-1	2020-02-11				Correspondance		Zhang, Hong	The Lancet
2019-nCoV, fake news, and racism	10.1016/S0140-6736(20)30357-3	2020-02-11	2020-02-10			Correspondance		Shimizu, Kazuki	The Lancet
Minimise nosocomial spread of 2019-nCoV when treating acute respiratory failure	10.1016/S0140-6736(20)30359-7	2020-02-11				Correspondance		Cabrini, Luca; Landoni, Giovanni; Zangrillo, Alberto	The Lancet
On the use of corticosteroids for 2019-nCoV pneumonia	10.1016/S0140-6736(20)30361-5	2020-02-11				Correspondance		Shang, Lianhan; Zhao, Jianping; Hu, Yi; Du, Ronghui; Cao, Bin	The Lancet
Preparation for Possible Sustained Transmission of 2019 Novel Coronavirus: Lessons From Previous Epidemics	10.1001/jama.2020.1960	2020-02-11	2020-01-30			Commentary		Swerdlow, David L.; Finelli, Lyn	JAMA
Novel coronavirus, poor quarantine, and the risk of pandemic	10.1016/j.jhin.2020.02.002	2020-02-11	2020-02-04	2020-02-04	2020-02-04	Commentary		Khan, S.; Siddique, R.; Ali, A.; Xue, M.; Nabi, G.	Journal of Hospital Infection
The outbreak of COVID-19: An overview	10.1097/jcma.0000000000000270	2020-02-11	2020-02-07			Commentary		Wu, Y. C.; Chen, C. S.; Chan, Y. J.	Journal of the Chinese Medical Association : JCMA
Novel Coronavirus Pneumonia Outbreak in 2019: Computed Tomographic Findings in Two Cases	10.3348/kjr.2020.0078	2020-02-11	2020-01-27	2020-02-01	2020-02-04	Case Study		['Lin, Xiaoqi', 'Gong, Zhenyu', 'Xiao, Zuke', 'Xiong, Jingliang', 'Fan, Bing', 'Liu, Jiaqi']	Korean J Radiol
Pneumonia Associated with 2019 Novel Coronavirus: Can Computed Tomographic Findings Help Predict the Prognosis of the Disease?	10.3348/kjr.2020.0096	2020-02-11		2020-02-05	2020-02-06	Editorial		Lee, Kyung Soo	Korean J Radiol
Coronavirus: why a permanent ban on wildlife trade might not work in China	10.1038/d41586-020-00377-x	2020-02-11				Correspondence		Ribeiro, Joana; Bingre, Pedro; Strubbe, Diederik; Reino, Luís	Nature
China: clamp down on violations of wildlife trade ban	10.1038/d41586-020-00378-w	2020-02-11				Correspondence		Zhou, Z. M.; Buesching, C. D.; Macdonald, D. W.; Newman, C.	Nature
2019-nCoV: Polite with children!	10.4081/pr.2020.8495	2020-02-11	2020-02-05	2020-02-06	2020-02-10	Editorial		Arico, Désirée Caselli; Maurizio	Pediatric Reports
Old Weapon for New Enemy: Drug Repurposing for Treatment of Newly Emerging Viral Diseases	10.1007/s12250-020-00204-7	2020-02-11	2020-01-29	2020-01-29	2020-01-31	Perspective			Virologica Sinica
Labs scramble to spot hidden coronavirus infections	10.1126/science.abb2651	2020-02-11	2020-02-11			News Item		Jon Cohen, et al.	Science
Are we ready for the new fatal Coronavirus: scenario of Pakistan?	10.1080/21645515.2020.1724000	2020-02-12	2020-02-03			Correspondence		Ahmad, Tauseef; Khan, Muhammad; Khan, Fazal Mehmood; Hui, Jin	Human Vaccines & Immunotherapeutics
The global spread of 2019-nCoV: a molecular evolutionary analysis	10.1080/20477724.2020.1725339	2020-02-12	2020-01-26			Research		Benvenuto, Domenico; Giovanetti, Marta; Salemi, Marco; Prosperi, Mattia; De Flora, Cecilia; Junior Alcantara, Luiz Carlos; Angeletti, Silvia; Ciccozzi, Massimo	Pathog Glob Health
Practical recommendations for critical care and anesthesiology teams caring for novel coronavirus (2019-nCoV) patients	10.1007/s12630-020-01591-x	2020-02-12	2020-02-07	2020-02-07	2020-02-07	Review		Wax, Randy S.; Christian, Michael D.	Can Journal Anaesth
Novel coronavirus takes flight from bats?	10.1038/s41579-020-0336-9	2020-02-12				Commentary		York, Ashley	Nature Reviews Microbiology
A Locally Transmitted Case of SARS-CoV-2 Infection in Taiwan	10.1056/NEJMc2001573	2020-02-12	2020-01-29			Case Study		Liu, Ying-Chu; Liao, Ching-Hui; Chang, Chin-Fu; Chou, Chu-Chung; Lin, Yan-Ren	New England Journal of Medicine
Journey of a Thai Taxi Driver and Novel Coronavirus	10.1056/NEJMc2001621	2020-02-12	2020-02-05			Case Study		Pongpirul, Wannarat A.; Pongpirul, Krit; Ratnarathon, Anuttra C.; Prasithsirikul, Wisit	New England Journal of Medicine
The progress of 2019 Novel Coronavirus (2019-nCoV) event in China	10.1002/jmv.25705	2020-02-12		2020-02-02	2020-02-10	Commentary		Guan, Wang; Xian, Jin	Journal of Medical Virology
Economic Impacts of Wuhan 2019-nCoV on China and the World	10.1002/jmv.25706	2020-02-12	2020-02-17	2020-02-09	2020-02-11	Commentary		Ayittey, Foster Kofi; Ayittey, Matthew Kormla; Chiwero, Nyasha Bennita; Kamasah, Japhet Senyo; Dzuvor, Christian	Journal of Medical Virology
Maybe not an overreaction	10.1126/scitranslmed.aba9019	2020-02-12	2020-02-12			Editorial		Han, Li-Hsin	Science Translational Medicine
Pre- and Posttreatment Chest CT Findings: 2019 Novel Coronavirus (2019-nCoV) Pneumonia	10.1148/radiol.2020200323	2020-02-12		2020-02-05	2020-02-07	Case Study		Duan, Ya-Ni; Qin, Jie	Radiology
Use of Chest CT in Combination with Negative RT-PCR Assay for the 2019 Novel Coronavirus but High Clinical Suspicion	10.1148/radiol.2020200330	2020-02-12		2020-02-06	2020-02-09	Case Study		Huang, Peikai; Liu, Tianzhu; Huang, Lesheng; Liu, Hailong; Lei, Ming; Xu, Wangdong; Hu, Xiaolu; Chen, Jun; Liu, Bo	Radiology
Chest CT for Typical 2019-nCoV Pneumonia: Relationship to Negative RT-PCR Testing	10.1148/radiol.2020200343	2020-02-12				Case Study		Xie, Xingzhi; Zhong, Zheng; Zhao, Wei; Zheng, Chao; Wang, Fei; Liu, Jun	Radiology
Community pharmacist in public health emergencies: Quick to action against the coronavirus 2019-nCoV outbreak	10.1016/j.sapharm.2020.02.003	2020-02-12	2020-02-08	2020-02-09	2020-02-09	Commentary		Lam Ung, Carolina Oi	Research in Social and Administrative Pharmacy
Consistent detection of 2019 novel coronavirus in saliva	10.1093/cid/ciaa149	2020-02-12		2020-02-05	2020-02-10	Research		To, Kelvin Kai-Wang; Tsang, Owen Tak-Yin; Chik-Yan Yip, Cyril; Chan, Kwok-Hung; Wu, Tak-Chiu; Chan, Jacky M. C.; Leung, Wai-Shing; Chik, Thomas Shiu-Hong; Choi, Chris Yau-Chung; Kandamby, Darshana H.; Lung, David Christopher; Tam, Anthony Raymond; Poon, Rosana Wing-Shan; Fung, Agnes Yim-Fong; Hung, Ivan Fan-Ngai; Cheng, Vincent Chi-Chung; Chan, Jasper Fuk-Woo; Yuen, Kwok-Yung	Clinical Infectious Diseases
Potential role of inanimate surfaces for the spread of coronaviruses and their inactivation with disinfectant agents	10.1016/j.infpip.2020.100044	2020-02-12	2020-02-02	2020-02-03	2020-02-04	Commentary		Kampf, Günter	Infection Prevention in Practice
Anti-Chinese sentiment during the 2019-nCoV outbreak	10.1016/S0140-6736(20)30358-5	2020-02-12				Correspondance		Chung, Roger Yat-Nork; Li, Minnie Ming	The Lancet
Clinical characteristics and intrauterine vertical transmission potential of COVID-19 infection in nine pregnant women: a retrospective review of medical records	10.1016/S0140-6736(20)30360-3	2020-02-12	2020-01-31			Case Study		Chen, Huijun; Guo, Juanjuan; Wang, Chen; Luo, Fan; Yu, Xuechen; Zhang, Wei; Li, Jiafu; Zhao, Dongchi; Xu, Dan; Gong, Qing; Liao, Jing; Yang, Huixia; Hou, Wei; Zhang, Yuanzhen	The Lancet
What are the risks of COVID-19 infection in pregnant women?	10.1016/S0140-6736(20)30365-2	2020-02-12	2020-02-11			Commentary		Qiao, Jie	The Lancet
Preliminary prediction of the basic reproduction number of the Wuhan novel coronavirus 2019-nCoV	10.1111/jebm.12376	2020-02-12	2020-01-25	2020-01-29	2020-01-29	Research		Zhou, Tao; Liu, Quanhui; Yang, Zimo; Liao, Jingyi; Yang, Kexin; Bai, Wei; Lu, Xin; Zhang, Wei	Journal of Evidence Based Medicine
Daily briefing: The potential for repurposing existing drugs to fight COVID-19 coronavirus	10.1038/d41586-020-00412-x	2020-02-12				News Item		Graham, Flora	Nature
Toning down the 2019-nCoV media hype—and restoring hope	10.1016/S2213-2600(20)30070-9	2020-02-12	2020-02-10			Commentary		Ippolito, Giuseppe; Hui, David S.; Ntoumi, Francine; Maeurer, Markus; Zumla, Alimuddin	The Lancet Respiratory Medicine
The Covid-19 epidemic	10.1111/tmi.13383	2020-02-12	2020-02-13			Editorial		Velavan, Thirumalaisamy P.; Meyer, Christian G.	Tropical Medicine & International Health
Overlapping and discrete aspects of the pathology and pathogenesis of the emerging human pathogenic coronaviruses SARS-CoV, MERS-CoV, and 2019-nCoV	10.1002/jmv.25709	2020-02-13		2020-02-07	2020-02-13	Review		Liu, Jia; Zheng, Xin; Tong, Qiaoxia; Li, Wei; Wang, Baoju; Sutter, Kathrin; Trilling, Mirko; Lu, Mengji; Dittmer, Ulf; Yang, Dongliang	Journal of Medical Virology
Coronavirus: online GP bookings should be stopped because of safety risks, warns BMA	10.1136/bmj.m611	2020-02-13	2020-02-12			News Item		Mahase, Elisabeth	BMJ
Physicians work out treatment guidelines for coronavirus		2020-02-13				News Item/Editorial?		Sung-sun, K.	Korea Biomedical Review
The 2019 coronavirus: Learning curves, lessons, and the weakest link	10.1111/ijcp.13488	2020-02-13				Editorial	2020.02.26 addendum added in proof stage?	Stein, Richard Albert	Int Journal Clin Pract
Time Course of Lung Changes On Chest CT During Recovery From 2019 Novel Coronavirus (COVID-19) Pneumonia	10.1148/radiol.2020200370	2020-02-13	2020-02-06			Case study	as of 7.02.2020	Pan, Feng; Ye, Tianhe; Sun, Peng; Gui, Shan; Liang, Bo; Li, Lingli; Zheng, Dandan; Wang, Jiazheng; Hesketh, Richard L.; Yang, Lian; Zheng, Chuansheng	Radiology
Potential Interventions for Novel Coronavirus in China: A Systemic Review	10.1002/jmv.25707	2020-02-13		2020-01-30	2020-02-04	Review		Zhang, Lei; Liu, Yunhui	Journal of Medical Virology
Seven days in medicine: 5-11 Feb 2020	10.1136/bmj.m548	2020-02-13	2020-02-10			News Item			BMJ
Covid-19: a puzzle with many missing pieces	10.1136/bmj.m627	2020-02-13	2020-02-15			Editorial		Vetter, Pauline; Eckerle, Isabella; Kaiser, Laurent	BMJ
Latest updates on COVID-19 from the European Centre for Disease Prevention and Control	10.2807/1560-7917.ES.2020.25.6.2002131	2020-02-13				Commentary			Eurosurveillance
Erratum for Euro Surveill. 2020;25(5)	10.2807/1560-7917.ES.2020.25.6.2002132	2020-02-13				Correction			Eurosurveillance
Laboratory readiness and response for novel coronavirus (2019-nCoV) in expert laboratories in 30 EU/EEA countries, January 2020	10.2807/1560-7917.ES.2020.25.6.2000082	2020-02-13	2020-02-10			Report		Reusken, Chantal B.E.M.; Broberg, Eeva K.; Haagmans, Bart; Meijer, Adam; Corman, Victor M.; Papa, Anna; Charrel, Remi; Drosten, Christian; Koopmans, Marion; Leitmeyer, Katrin	Eurosurveillance
First cases of coronavirus disease 2019 (COVID-19) in France: surveillance, investigations and control measures, January 2020	10.2807/1560-7917.ES.2020.25.6.2000094	2020-02-13	2020-02-12	2020-02-05	2020-02-11	Case Study		Stoecklin, Sibylle Bernard; Rolland, Patrick; Silue, Yassoungo; Mailles, Alexandra; Campese, Christine; Simondon, Anne; Mechain, Matthieu; Meurice, Laure; Nguyen, Mathieu; Bassi, Clément; Yamani, Estelle; Behillil, Sylvie; Ismael, Sophie; Nguyen, Duc; Malvy, Denis; Lescure, François Xavier; Georges, Scarlett; Lazarus, Clément; Tabai, Anouk; Stempfelet, Morgane; Enouf, Vincent; Coignard, Bruno; Le…	Eurosurveillance
Scientists fear coronavirus spread in countries least able to contain it	10.1038/d41586-020-00405-w	2020-02-13	2020-02-11			News Item	Updated 16.feb.2020	Mallapaty, Smriti	Nature
Initial CT findings and temporal changes in patients with the novel coronavirus pneumonia (2019-nCoV): a study of 63 patients in Wuhan, China	10.1007/s00330-020-06731-x	2020-02-13	2020-02-02	2020-02-06	2020-02-06	Case Study		Pan, Yueying; Guan, Hanxiong; Zhou, Shuchang; Wang, Yujin; Li, Qian; Zhu, Tingting; Hu, Qiongjie; Xia, Liming	European Radiology
Three Emerging Coronaviruses in Two Decades	10.1093/ajcp/aqaa029	2020-02-13	2020-02-11			Editorial		Guarner, Jeannette	Am Journal Clin Pathol
Straining the System: Novel Coronavirus (COVID-19) and Preparedness for Concomitant Disasters	10.2105/AJPH.2020.305618	2020-02-13			2020-02-09	Editorial		Smith, Nathaniel; Fraser, Michael	Am Journal Public Health
Infections without borders: a new coronavirus in Wuhan, China	10.12968/bjon.2020.29.3.166	2020-02-13	2020-01-31			Commentary		Wood, Cate	Br Journal Nurs
Risk for Transportation of 2019 Novel Coronavirus Disease from Wuhan to Other Cities in China	10.3201/eid2605.200146	2020-02-13	2020-01-31			Research		Du, Zhanwei; Wang, Lin; Cauchemez, Simon; Xu, Xiaoke; Wang, Xianwen; Cowling, Benjamin J.; Meyers, Lauren Ancel	Emerg Infect Dis
First imported case of 2019 novel coronavirus in Canada, presenting as mild pneumonia	10.1016/S0140-6736(20)30370-6	2020-02-13				Case Study		Silverstein, William Kyle; Stroud, Lynfa; Cleghorn, Graham Edward; Leis, Jerome Allen	The Lancet
Do not violate the International Health Regulations during the COVID-19 outbreak	10.1016/S0140-6736(20)30373-1	2020-02-13				Commentary		Habibi, Roojin; Burci, Gian Luca; de Campos, Thana C.; Chirwa, Danwood; Cina, Margherita; Dagron, Stéphanie; Eccleston-Turner, Mark; Forman, Lisa; Gostin, Lawrence O.; Meier, Benjamin Mason; Negri, Stefania; Ooms, Gorik; Sekalala, Sharifah; Taylor, Allyn; Yamin, Alicia Ely; Hoffman, Steven J.	The Lancet
US Emergency Legal Responses to Novel Coronavirus: Balancing Public Health and Civil Liberties	10.1001/jama.2020.2025	2020-02-13	2020-01-31			Commentary		Gostin, Lawrence O.; Hodge, James G., Jr.	JAMA
Potential inhibitors against 2019-nCoV coronavirus M protease from clinically approved medicines	10.1016/j.jgg.2020.02.001	2020-02-13		2020-01-28	2020-02-08	Research		Liu, Xin; Wang, Xiu-Jie	Journal of Genetics and Genomics
Does SARS-CoV-2 has a longer incubation period than SARS and MERS?	10.1002/jmv.25708	2020-02-13	2020-02-08	2020-02-10	2020-02-13	Research		Jiang, Xuan; Rayner, Simon; Luo, Min-Hua	Journal of Medical Virology
Isolation, quarantine, social distancing and community containment: pivotal role for old-style public health measures in the novel coronavirus (2019-nCoV) outbreak	10.1093/jtm/taaa020	2020-02-13	2020-02-02	2020-02-06	2020-02-10	Perspective		Wilder-Smith, A.; Freedman, D. O.	Journal of Travel Medicine
The reproductive number of COVID-19 is higher compared to SARS coronavirus	10.1093/jtm/taaa021	2020-02-13	2020-02-07			Review	As of Feb. 8	Liu, Ying; Gayle, Albert A.; Wilder-Smith, Annelies; Rocklöv, Joacim	Journal of Travel Medicine
COVID-19: what is next for public health?	10.1016/s0140-6736(20)30374-3	2020-02-13	2020-02-07			Commentary		Heymann, David L.; Shindo, Nahoko; Bedford, Juliet; Enria, Delia; Giesecke, Johan; Heymann, David; Ihekweazu, Chikwe; Kobinger, Gary; Lane, Clifford; Memish, Ziad; Myoung-don, Oh; Sall, Amadou Alpha; Ungchusak, Kum; Wieler, Lothar; Infect, W. H. O. Sci Tech Advisory Grp	Lancet
Authoritarianism, outbreaks, and information politics	10.1016/S2468-2667(20)30030-X	2020-02-13				Commentary		Kavanagh, Matthew M.	The Lancet Public Health
Protecting health-care workers from subclinical coronavirus infection	10.1016/S2213-2600(20)30066-7	2020-02-13				Correspondance		Chang, De; Xu, Huiwen; Rebaza, Andre; Sharma, Lokesh; Dela Cruz, Charles S.	The Lancet Respiratory Medicine
Therapeutic and triage strategies for 2019 novel coronavirus disease in fever clinics	10.1016/S2213-2600(20)30071-0	2020-02-13				Recommendation		Zhang, Jinnong; Zhou, Luqian; Yang, Yuqiong; Peng, Wei; Wang, Wenjing; Chen, Xuelin	The Lancet Respiratory Medicine
Case of the Index Patient Who Caused Tertiary Transmission of Coronavirus Disease 2019 in Korea: the Application of Lopinavir/Ritonavir for the Treatment of COVID-19 Pneumonia Monitored by Quantitative RT-PCR	10.3346/jkms.2020.35.e79	2020-02-14	2020-02-10	2020-02-10	2020-02-11	Case study		Lim, Jaegyun; Jeon, Seunghyun; Shin, Hyun Young; Kim, Moon Jung; Seong, Yu Min; Lee, Wang Jun; Choe, Kang Won; Kang, Yu Min; Lee, Baeckseung; Park, Sang Joon	Journal of Korean Medical Science
Coronavirus: home testing pilot launched in London to cut hospital visits and ambulance use	10.1136/bmj.m621	2020-02-14	2020-02-13			News Item		Mahase, Elisabeth	BMJ
Novel Coronavirus Infection in Hospitalized Infants Under 1 Year of Age in China	10.1001/jama.2020.2131	2020-02-14	2020-02-06			Case study		Wei, Min Yuan, Jingping Liu,Yu Fu,Tao Yu,Xue Zhang,Zhi-Jiang	JAMA
The novel Coronavirus (SARS-CoV-2) is a one health issue	10.1016/j.onehlt.2020.100123	2020-02-14				Editorial		Marty, Aileen Maria', 'Jones, Malcolm K.	One Health
Real-Time Estimation of the Risk of Death from Novel Coronavirus (COVID-19) Infection: Inference Using Exported Cases	10.3390/jcm9020523	2020-02-14	2020-01-26	2020-01-29	2020-02-12	Research		Jung, Sung-mok; Akhmetzhanov, Andrei R.; Hayashi, Katsuma; Linton, Natalie M.; Yang, Yichi; Yuan, Baoyin; Kobayashi, Tetsuro; Kinoshita, Ryo; Nishiura, Hiroshi	Journal of Clinical Medicine
Labs scramble to spot hidden coronavirus infections	10.1126/science.367.6479.727	2020-02-14				News Item		Cohen, Jon; Kupferschmidt; Kai	Science
Imaging features of 2019 novel coronavirus pneumonia	10.1007/s00259-020-04720-2	2020-02-14				Case Study		Xu, Xi; Yu, Chengcheng; Zhang, Lieguang; Luo, Liangping; Liu, Jinxin	European Journal of Nuclear Medicine and Molecular Imaging
HIV-1 did not contribute to the 2019-nCoV genome	10.1080/22221751.2020.1727299	2020-02-14		2020-02-04	2020-02-04	Commentary		['Xiao, Chuan', 'Li, Xiaojun', 'Liu, Shuying', 'Sang, Yongming', 'Gao, Shou-Jiang', 'Gao, Feng']	Emerg Microbes Infect
Real-time forecasts of the COVID-19 epidemic in China from February 5th to February 24th, 2020	10.1016/j.idm.2020.02.002	2020-02-14	2020-02-09	2020-02-10	2020-02-12	Research		['Roosa, K.', 'Lee, Y.', 'Luo, R.', 'Kirpich, A.', 'Rothenberg, R.', 'Hyman, J.M.', 'Yan, P.', 'Chowell, G.']	Infectious Disease Modelling
Letter to the Editor: Case of the Index Patient Who Caused Tertiary Transmission of Coronavirus Disease 2019 in Korea: the Application of Lopinavir/Ritonavir for the Treatment of COVID-19 Pneumonia Monitored by Quantitative RT-PCR	10.3346/jkms.2020.35.e88	2020-02-14	2020-02-06	2020-02-10	2020-02-11	Correspondence		Kim, Jin Yong	Journal Korean Med Sci
Novel coronavirus pneumonia emergency in Zhuhai: impact and challenges	10.1016/j.jhin.2020.02.005	2020-02-14	2020-02-07	2020-02-06	2020-02-09	Commentary		Jin, Hao; Lu, Ligong; Liu, Junwei; Cui, Min	Journal of Hospital Infection
Cancer patients in SARS-CoV-2 infection: a nationwide analysis in China	10.1016/S1470-2045(20)30096-6	2020-02-14	2020-01-31			Case Study		Liang, Wenhua; Guan, Weijie; Chen, Ruchong; Wang, Wei; Li, Jianfu; Xu, Ke; Li, Caichen; Ai, Qing; Lu, Weixiang; Liang, Hengrui; Li, Shiyue; He, Jianxing	The Lancet Oncology
The First Disease X is Caused by a Highly Transmissible Acute Respiratory Syndrome Coronavirus	10.1007/s12250-020-00206-5	2020-02-14		2020-02-06	2020-02-09	Review		Jiang, Shibo; Shi, Zheng-Li	Virologica Sinica
The health carer	10.1126/science.367.6479.730	2020-02-14				Commentary		Kupferschmidt, Kai	Science
Africa prepares for coronavirus	10.1016/S0140-6736(20)30355-X	2020-02-15	2020-02-10			Editorial		Makoni, Munyaradzi	The Lancet
Novel Wuhan (2019-nCoV) Coronavirus	10.1164/rccm.2014P7	2020-02-15	2020-02-07			Information series		Carlos, W. G.; Dela Cruz, C. S.; Cao, B.; Pasnick, S.; Jamil, S.	American journal of respiratory and critical care medicine
Chloroquine for the 2019 novel coronavirus SARS-CoV-2	10.1016/j.ijantimicag.2020.105923	2020-02-15		2020-02-11	2020-02-11	Commentary		Colson, Philippe; Rolain, Jean-Marc; Raoult, Didier	International journal of antimicrobial agents
Offline: How to defeat political populism	10.1016/S0140-6736(20)30363-9	2020-02-15				Commentary		Horton, Richard	The Lancet
More than 80 clinical trials launch to test coronavirus treatments	10.1038/d41586-020-00444-3	2020-02-15				News Item		Nature	Nature
Effects of misleading media coverage on public health crisis: a case of the 2019 novel coronavirus outbreak in China	10.1080/13032917.2020.1730621	2020-02-16				Commentary		Wen, Jun; Aston, Joshua; Liu, Xinyi; Ying, Tianyu	Anatolia
Timely research papers about COVID-19 in China	10.1016/S0140-6736(20)30375-5	2020-02-17	2020-02-03			Correspondance		Xiang et al.	The Lancet
Biotech start-ups hit by coronavirus work stoppages		2020-02-17				News Item			C&EN Global Enterprise
Severe acute respiratory syndrome coronavirus 2 (SARS-CoV-2) and corona virus disease-2019 (COVID-19): the epidemic and the challenges	10.1016/j.ijantimicag.2020.105924	2020-02-17		2020-02-11	2020-02-12	Review		Lai, Chih-Cheng; Shih, Tzu-Ping; Ko, Wen-Chien; Tang, Hung-Jen; Hsueh, Po-Ren	International Journal of Antimicrobial Agents
Incubation Period and Other Epidemiological Characteristics of 2019 Novel Coronavirus Infections with Right Truncation: A Statistical Analysis of Publicly Available Case Data	10.3390/jcm9020538	2020-02-17		2020-01-25	2020-02-10	Research		Linton, M. Natalie; Kobayashi, Tetsuro; Yang, Yichi; Hayashi, Katsuma; Akhmetzhanov, R. Andrei; Jung, Sung-mok; Yuan, Baoyin; Kinoshita, Ryo; Nishiura, Hiroshi	Journal of Clinical Medicine
Discovery and development of safe-in-man broad-spectrum antiviral agents	10.1016/j.ijid.2020.02.018	2020-02-17		2020-01-24	2020-02-11	Review		Andersen, Petter I.; Ianevski, Aleksandr; Lysvand, Hilde; Vitkauskiene, Astra; Oksenych, Valentyn; Bjoras, Magnar; Telling, Kaidi; Lutsar, Irja; Dampis, Uga; Irie, Yasuhiko; Tenson, Tanel; Kantele, Anu; Kainov, Denis E.	International Journal of Infectious Diseases
Can Chinese Medicine Be Used for Prevention of Corona Virus Disease 2019 (COVID-19)? A Review of Historical Classics, Research Evidence and Current Prevention Programs	10.1007/s11655-020-3192-6	2020-02-17	2020-02-12		2020-02-13	Commentary		Luo, Hui; Tang, Qiao-Ling; Shang, Ya-Xi; Liang, Shi-Bing; Yang, Ming; Robinson, Nicola; Liu, Jian-Ping	Chin Journal Integr Med
Structure analysis of the receptor binding of 2019-nCoV	10.1016/j.bbrc.2020.02.071	2020-02-17		2020-02-06	2020-02-10	Research		Chen, Yun; Guo, Yao; Pan, Yihang; Zhao, Zhizhuang Joe	Biochemical and Biophysical Research Communications
Challenges to the system of reserve medical supplies for public health emergencies: reflections on the outbreak of the severe acute respiratory syndrome coronavirus 2 (SARS-CoV-2) epidemic in China	10.5582/bst.2020.01043	2020-02-17	2020-02-12	2020-02-01	2020-02-16	Commentary		Wang, Xu; Zhang, Xiaoxi; He, Jiangjiang	Biosci Trends
Coronaviruses: a paradigm of new emerging zoonotic diseases	10.1093/femspd/ftaa006	2020-02-17	2020-02-07	2020-02-07	2020-02-13	Perspective		Salata, Cristiano; Calistri, Arianna; Parolin, Cristina; Palu, Giorgio	Pathogens and Disease
Communication, transparency key as Canada faces new coronavirus threat	10.1503/cmaj.1095846	2020-02-17				News Item		Glauser, Wendy	CMAJournal : Canadian Medical Association journal = journal de l'Association medicale canadienne
Potent binding of 2019 novel coronavirus spike protein by a SARS coronavirus-specific human monoclonal antibody	10.1080/22221751.2020.1729069	2020-02-17	2020-02-01	2020-01-27	2020-02-03	Research		Tian, Xiaolong; Li, Cheng; Huang, Ailing; Xia, Shuai; Lu, Sicong; Shi, Zhengli; Lu, Lu; Jiang, Shibo; Yang, Zhenlin; Wu, Yanling; Ying, Tianlei	Emerg Microbes Infect
Molecular and serological investigation of 2019-nCoV infected patients: implication of multiple shedding routes	10.1080/22221751.2020.1729071	2020-02-17	2020-02-03	2020-02-04	2020-02-07	Research		Zhang, Wei; Du, Rong-Hui; Li, Bei; Zheng, Xiao-Shuang; Yang, Xing-Lou; Hu, Ben; Wang, Yan-Yi; Xiao, Geng-Fu; Yan, Bing; Shi, Zheng-Li; Zhou, Peng	Emerg Microbes Infect
Evidence of SARS-CoV-2 Infection in Returning Travelers from Wuhan, China	10.1056/NEJMc2001899	2020-02-18	2020-02-08			Case Study		Hoehl, Sebastian; Berger, Annemarie; Kortenbusch, Marhild; Cinatl, Jindrich; Bojkova, Denisa; Rabenau, Holger; Behrens, Pia; Böddinghaus, Boris; Götsch, Udo; Naujoks, Frank; Neumann, Peter; Schork, Joscha; Tiarks-Jungk, Petra; Walczok, Antoni; Eickmann, Markus; Vehreschild, Maria J. G. T.; Kann, Gerrit; Wolf, Timo; Gottschalk, René; Ciesek, Sandra	New England Journal of Medicine
Development of Genetic Diagnostic Methods for Novel Coronavirus 2019 (nCoV-2019) in Japan	10.7883/yoken.JJID.2020.061	2020-02-18	2020-02-08	2020-02-12	2020-02-13	Research		Shirato, Kazuya; Nao, Naganori; Katano, Harutaka; Takayama, Ikuyo; Saito, Shinji; Kato, Fumihiro; Katoh, Hiroshi; Sakata, Masafumi; Nakatsu, Yuichiro; Mori, Yoshio; Kageyama, Tsutomu; Matsuyama, Shutoku; Takeda, Makoto	Japanese Journal of Infectious Diseases
We shouldn't worry when a virus mutates during disease outbreaks	10.1038/s41564-020-0690-4	2020-02-18				Commentary		Grubaugh, Nathan D.; Petrone, Mary E.; Holmes, Edward C.	Nature Microbiology
Coronavirus covid-19 has killed more people than SARS and MERS combined, despite lower case fatality rate	10.1136/bmj.m641	2020-02-18	2020-02-17			News Item		Mahase, Elisabeth	BMJ
Virus against virus: a potential treatment for 2019-nCov (SARS-CoV-2) and other RNA viruses	10.1038/s41422-020-0290-0	2020-02-18	2020-02-14			Editorial		Nguyen, Tuan M.; Zhang, Yang; Pandolfi, Pier Paolo	Cell Res
Outbreak of novel coronavirus (COVID-19): What is the role of radiologists?	10.1007/s00330-020-06748-2	2020-02-18	2020-02-11	2020-02-12	2020-02-13	Editorial		Kim, Hyungjin	European Radiology
2019 Novel coronavirus: where we are and what we know	10.1007/s15010-020-01401-y	2020-02-18	2020-01-31	2020-01-31	2020-02-07	Review		Cheng, Zhangkai J.; Shan, Jing	Infection
Recommended psychological crisis intervention response to the 2019 novel coronavirus pneumonia outbreak in China: a model of West China Hospital	10.1093/pcmedi/pbaa006	2020-02-18		2020-02-14	2020-02-15	Recommendation		Zhang, Jun; Wu, Weili; Zhao, Xin; Zhang, Wei	Precision Clinical Medicine
A familial cluster of infection associated with the 2019 novel coronavirus indicating potential person-to-person transmission during the incubation period	10.1093/infdis/jiaa077	2020-02-18	2020-01-24	2020-01-28	2020-02-15	Case Study	As of 2020.02.12	Yu, Ping; Zhu, Jiang; Zhang, Zhengdong; Han, Yingjun; Huang, Lihong	The Journal of Infectious Diseases
How to face the novel coronavirus infection during the 2019–2020 epidemic: the experience of Sichuan Provincial People’s Hospital	10.1007/s00134-020-05964-0	2020-02-18	2020-02-06	2020-02-06	2020-02-08	Editorial		Pan, Lingai; Wang, Li; Huang, Xiaobo	Intensive Care Medicine volume
Virus Isolation from the First Patient with SARS-CoV-2 in Korea	10.3346/jkms.2020.35.e84	2020-02-18	2020-02-14	2020-02-11	2020-02-17	Research		['Park, Wan Beom', 'Kwon, Nak-Jung', 'Choi, Su-Jin', 'Kang, Chang Kyung', 'Choe, Pyoeng Gyun', 'Kim, Jin Yong', 'Yun, Jiyoung', 'Lee, Gir-Won', 'Seong, Moon-Woo', 'Kim, Nam Joong', 'Seo, Jeong-Sun', 'Oh, Myoung-don']	Journal Korean Med Sci
What are we doing in the dermatology outpatient department amidst the raging of 2019-nCoV?	10.1016/j.jaad.2020.02.030	2020-02-18	2020-02-10			Commentary		Chen, Yusha; Pradhan, Sushmita; Xue, Siliang	Journal of the American Academy of Dermatology
Coronavirus (COVID-19) Outbreak: What the Department of Radiology Should Know	10.1016/j.jacr.2020.02.008	2020-02-18	2020-02-05			Commentary		Kooraki, Soheil; Hosseiny, Melina; Myers, Lee; Gholamrezanezhad, Ali	Journal of the American College of Radiology : JACR
Moral imperative for the immediate release of 2019-nCoV sequence data	10.1093/nsr/nwaa030	2020-02-18	2020-02-10			Commentary		Wu, Chung- I.; Poo, Mu-ming	National Science Review
When will the coronavirus outbreak peak?	10.1038/d41586-020-00361-5	2020-02-18	2020-02-13			News Item		Cyranoski, David	Nature
Avoid stigmatizing names for 2019 novel coronavirus	10.1038/d41586-020-00458-x	2020-02-18				Correspondance		Shu, Lele	Nature
The first Vietnamese case of COVID-19 acquired from China	10.1016/S1473-3099(20)30111-0	2020-02-18	2020-02-06			Case Study		Van Cuong, Le; Giang, Hoang Thi Nam; Linh, Le Khac; Shah, Jaffer; Van Sy, Le; Hung, Trinh Huu; Reda, Abdullah; Truong, Luong Ngoc; Tien, Do Xuan; Huy, Nguyen Tien	The Lancet Infectious Diseases
Psychological interventions for people affected by the COVID-19 epidemic	10.1016/S2215-0366(20)30073-0	2020-02-18				Commentary		Duan, Li; Zhu, Gang	The Lancet Psychiatry
The neglected health of international migrant workers in the COVID-19 epidemic	10.1016/S2215-0366(20)30076-6	2020-02-18				Commentary		Liem, Andrian; Wang, Cheng; Wariyanti, Yosa; Latkin, Carl A.; Hall, Brian J.	The Lancet Psychiatry
Online mental health services in China during the COVID-19 outbreak	10.1016/S2215-0366(20)30077-8	2020-02-18	2020-02-08			Correspondance		Liu, Shuai; Yang, Lulu; Zhang, Chenxi; Xiang, Yu-Tao; Liu, Zhongchun; Hu, Shaohua; Zhang, Bin	The Lancet Psychiatry
Mental health services for older adults in China during the COVID-19 outbreak	10.1016/S2215-0366(20)30079-1	2020-02-18				Correspondance		Yang, Yuan; Li, Wen; Zhang, Qinge; Zhang, Ling; Cheung, Teris; Xiang, Yu-Tao	The Lancet Psychiatry
Tracking online heroisation and blame in epidemics	10.1016/S2468-2667(20)30033-5	2020-02-18				Commentary		Atlani-Duault, Laëtitia; Ward, Jeremy K.; Roy, Melissa; Morin, Céline; Wilson, Andrew	The Lancet Public Health
Pathological findings of COVID-19 associated with acute respiratory distress syndrome	10.1016/S2213-2600(20)30076-X	2020-02-18	2020-02-15			Case Study		Xu, Zhe; Shi, Lei; Wang, Yijin; Zhang, Jiyuan; Huang, Lei; Zhang, Chao; Liu, Shuhong; Zhao, Peng; Liu, Hongxia; Zhu, Li; Tai, Yanhong; Bai, Changqing; Gao, Tingting; Song, Jinwen; Xia, Peng; Dong, Jinghui; Zhao, Jingmin; Wang, Fu-Sheng	The Lancet Respiratory Medicine
Department of Error: Nowcasting and forecasting the potential domestic and international spread of the 2019-nCoV outbreak originating in Wuhan, China: a modelling study (The Lancet (2020) 395(10225) (689–697), (S0140673620302609), (10.1016/S0140-6736(20)30260-9))	10.1016/S0140-6736(20)30302-0	2020-02-19				Correction			The Lancet
Novel coronavirus 2019, an emerging public health emergency	10.1111/tbed.13509	2020-02-19	2020.01.25 after			Editorial		Ward, Michael P.; Li, Xiangdong; Tian, Kegong	Transbound Emerg Dis
Clinical findings in a group of patients infected with the 2019 novel coronavirus (SARS-Cov-2) outside of Wuhan, China: retrospective case series	10.1136/bmj.m606	2020-02-19	2020-01-26		2020-02-13	Research	The paper has a correction listing some minor errors	Xu, Xiao-Wei; Wu, Xiao-Xin; Jiang, Xian-Gao; Xu, Kai-Jin; Ying, Ling-Jun; Ma, Chun-Lian; Li, Shi-Bo; Wang, Hua-Ying; Zhang, Sheng; Gao, Hai-Nv; Sheng, Ji-Fang; Cai, Hong-Liu; Qiu, Yun-Qing; Li, Lan-Juan	BMJ
An interactive web-based dashboard to track COVID-19 in real time	10.1016/S1473-3099(20)30120-1	2020-02-19	2020-02-17			Research		Dong, Ensheng; Du, Hongru; Gardner, Lauren	The Lancet Infectious Diseases
Risk Assessment of Novel Coronavirus COVID-19 Outbreaks Outside China	10.3390/jcm9020571	2020-02-19		2020-02-05	2020-02-14	Research	Revised 2020.02.13	Boldog, Péter; Tekeli, Tamás; Vizi, Zsolt; Dénes, Attila; Bartha, Ferenc A.; Röst, Gergely	Journal of Clinical Medicine
Breakthrough: Chloroquine phosphate has shown apparent efficacy in treatment of COVID-19 associated pneumonia in clinical studies	10.5582/bst.2020.01047	2020-02-19	2020-02-16	2020-02-18	2020-02-18	Research		Gao, Jianjun; Tian, Zhenxue; Yang, Xu	BioScience Trends
Clinical characteristics of 140 patients infected with SARS-CoV-2 in Wuhan, China	10.1111/all.14238	2020-02-19	2020-02-16	2020-02-17	2020-02-18	Case study		Zhang, Jin-Jin; Dong, Xiang; Cao, Yi-Yuan; Yuan, Ya-Dong; Yang, Yi-Bin; Yan, You-Qin; Akdis, Cezmi A.; Gao, Ya-Dong	Allergy
The Novel Coronavirus Outbreak: What We Know and What We Don't	10.1016/j.cell.2020.02.027	2020-02-19				Commentary			Cell
SARS-CoV-2 Viral Load in Upper Respiratory Specimens of Infected Patients	10.1056/NEJMc2001737	2020-02-19	2020-02-06			Case Study		Zou, Lirong; Ruan, Feng; Huang, Mingxing; Liang, Lijun; Huang, Huitao; Hong, Zhongsi; Yu, Jianxiang; Kang, Min; Song, Yingchao; Xia, Jinyu; Guo, Qianfang; Song, Tie; He, Jianfeng; Yen, Hui-Ling; Peiris, Malik; Wu, Jie	New England Journal of Medicine
Defining the Epidemiology of Covid-19 — Studies Needed	10.1056/NEJMp2002125	2020-02-19				Perspective		Lipsitch, Marc; Swerdlow, David L.; Finelli, Lyn	New England Journal of Medicine
Rigidity of the Outer Shell Predicted by a Protein Intrinsic Disorder Model Sheds Light on the COVID-19 (Wuhan-2019-nCoV) Infectivity	10.3390/biom10020331	2020-02-19	2020-02-14	2020-02-14	2020-02-17	Editorial		Goh, Gerard Kian-Meng; Dunker, A. Keith; Foster, James A.; Uversky, Vladimir N.	Biomolecules
Four ways researchers are responding to the COVID-19 outbreak	10.1038/d41591-020-00002-4	2020-02-19				News Item		Keener, Amanda B.	Nature Medicine
Scientist decries ‘completely chaotic’ conditions on cruise ship Japan quarantined after viral outbreak	10.1126/science.abb3761	2020-02-19	2020-02-17			News Item		Normile, Dennis	Science
Letter from China: covid-19 on the grapevine, on the internet, and in commerce	10.1136/bmj.m643	2020-02-19				Commentary		Mowbray, Heather	BMJ
Frontiers in antiviral therapy and immunotherapy	10.1002/cti2.1115	2020-02-19		2020-02-05	2020-02-05	Editorial		Heaton, Steven M	Clinical & Translational Immunology
Critical care response to a hospital outbreak of the 2019-nCoV infection in Shenzhen, China	10.1186/s13054-020-2786-x	2020-02-19		2020-02-07	2020-02-12	Editorial		['Liu, Yong', 'Li, Jinxiu', 'Feng, Yongwen']	Crit Care
Sensitivity of Chest CT for COVID-19: Comparison to RT-PCR	10.1148/radiol.2020200432	2020-02-19	2020-02-04			Case Study		Fang, Yicheng; Zhang, Huangqi; Xie, Jicheng; Lin, Minjie; Ying, Lingjun; Pang, Peipei; Ji, Wenbin	Radiology
A novel coronavirus (COVID-19) outbreak: a call for action	10.1016/j.chest.2020.02.014	2020-02-19				Editorial		Zhang, Yi; Xu, Jiuyang; Li, Hui; Cao, Bin	Chest
First Atypical case of 2019 novel coronavirus in Yan'an, China	10.1016/j.cmi.2020.02.011	2020-02-19	2020-01-29		2020-02-12	Case Study		Hao, Wendong; Li, Manxiang; Huang, Xiaoqi	Clinical Microbiology and Infection
Statement in support of the scientists, public health professionals, and medical professionals of China combatting COVID-19	10.1016/S0140-6736(20)30418-9	2020-02-19				Correspondence		Calisher, Charles; Carroll, Dennis; Colwell, Rita; Corley, Ronald B.; Daszak, Peter; Drosten, Christian; Enjuanes, Luis; Farrar, Jeremy; Field, Hume; Golding, Josie; Gorbalenya, Alexander; Haagmans, Bart; Hughes, James M.; Karesh, William B.; Keusch, Gerald T.; Lam, Sai Kit; Lubroth, Juan; Mackenzie, John S.; Madoff, Larry; Mazet, Jonna; Palese, Peter; Perlman, Stanley; Poon, Leo; Roizman, Bernar…	The Lancet
A distinct name is needed for the new coronavirus	10.1016/S0140-6736(20)30419-0	2020-02-19	2020-02-17			Correspondence		Jiang, Shibo; Shi, Zhengli; Shu, Yuelong; Song, Jingdong; Gao, George F.; Tan, Wenjie; Guo, Deyin	The Lancet
Preparing for the Most Critically Ill Patients With COVID-19: The Potential Role of Extracorporeal Membrane Oxygenation	10.1001/jama.2020.2342	2020-02-19				Commentary		MacLaren, Graeme; Fisher, Dale; Brodie, Daniel	JAMA
Traditional chinese medicine is a resource for drug discovery against 2019 novel coronavirus (SARS-CoV-2)	10.1016/j.joim.2020.02.004	2020-02-19		2020-02-11	2020-02-13	Editorial		Ling, Chang-quan	Journal of Integrative Medicine
2019 novel coronavirus disease (COVID-19) in Taiwan: Reports of two cases from Wuhan, China	10.1016/j.jmii.2020.02.009	2020-02-19		2020-02-17	2020-02-17	Case Study		Huang, Wei-Hsuan; Teng, Ling-Chiao; Yeh, Ting-Kuang; Chen, Yu-Jen; Lo, Wei-Jung; Wu, Ming-Ju; Chin, Chun-Shih; Tsan, Yu-Tse; Lin, Tzu-Chieh; Chai, Jyh-Wen; Lin, Chin-Fu; Tseng, Chien-Hao; Liu, Chia-Wei; Wu, Chi-Mei; Chen, Po-Yen; Shi, Zhi-Yuan; Liu, Po-Yu	Journal of Microbiology, Immunology and Infection
Risk Management of COVID-19 by Universities in China	10.3390/jrfm13020036	2020-02-19	2020-02-15	2020-02-18	2020-02-18	Editorial		Wang, Chuanyi; Cheng, Zhe; Yue, Xiao-Guang; McAleer, Michael	Journal of Risk and Financial Management
Open access epidemiological data from the COVID-19 outbreak	10.1016/S1473-3099(20)30119-5	2020-02-19	2020-02-16			Correspondance		Xu, Bo; Kraemer, Moritz U. G.; Open, Covid-Data Curation Group	Lancet Infect Dis
Coronavirus and the race to distribute reliable diagnostics	10.1038/d41587-020-00002-2	2020-02-19	2020-02-18			News Item	Updated on Feb.21	Nature	Nature Biotechnology
Changes of CT Findings in a 2019 Novel Coronavirus (2019-nCoV) pneumonia patient	10.1093/qjmed/hcaa038	2020-02-19	2020-02-11	2020-02-13		Case Study		Fang, Xin; Zhao, Ming; Li, Shuang; Yang, Lanqing; Wu, Bing	QJM
Cryo-EM structure of the 2019-nCoV spike in the prefusion conformation	10.1126/science.abb2507	2020-02-19	2020-02-16	2020-02-10	2020-02-17	Research		Wrapp, Daniel; Wang, Nianshuang; Corbett, Kizzmekia S.; Goldsmith, Jory A.; Hsieh, Ching-Lin; Abiona, Olubukola; Graham, Barney S.; McLellan, Jason S.	Science
Intensive care during the coronavirus epidemic	10.1007/s00134-020-05966-y	2020-02-20	2020-02-04	2020-02-06	2020-02-10	Editorial		Qiu, Haibo; Tong, Zhaohui; Ma, Penglin; Hu, Ming; Peng, Zhiyong; Wu, Wenjuan; Du, Bin; China Critical Care Clinical Trials, Group	Intensive Care Medicine
Characteristics of and Public Health Responses to the Coronavirus Disease 2019 Outbreak in China	10.3390/jcm9020575	2020-02-20	2020-02-18	2020-01-30	2020-02-14	Review		Deng, Sheng-Qun; Peng, Hong-Juan	Journal Clin Med
Prevent and predict	10.1038/s41559-020-1150-5	2020-02-20				Editorial			Nature Ecology & Evolution
2019 novel coronavirus of pneumonia in Wuhan, China: emerging attack and management strategies	10.1186/s40169-020-00271-z	2020-02-20	2020-02-10	2020-02-05	2020-02-11	Review		['She, Jun', 'Jiang, Jinjun', 'Ye, Ling', 'Hu, Lijuan', 'Bai, Chunxue', 'Song, Yuanlin']	Clin Transl Med
Coronavirus COVID-19 impacts to dentistry and potential salivary diagnosis	10.1007/s00784-020-03248-x	2020-02-20		2020-02-15	2020-02-17	Commentary		Sabino-Silva, Robinson; Jardim, Ana Carolina Gomes; Siqueira, Walter L.	Clin Oral Investig
COVID-19: a critical care perspective informed by lessons learnt from other viral epidemics	10.1016/j.accpm.2020.02.002	2020-02-20	2020-02-16			Editorial		Ling, Lowell; Joynt, Gavin M.; Lipman, Jeff; Constantin, Jean-Michel; Joannes-Boyau, Olivier	Anaesthesia Critical Care & Pain Medicine
Chest CT Findings in Coronavirus Disease-19 (COVID-19): Relationship to Duration of Infection	10.1148/radiol.2020200463	2020-02-20	2020-02-17			Case Study		Bernheim, Adam; Mei, Xueyan; Huang, Mingqian; Yang, Yang; Fayad, Zahi A.; Zhang, Ning; Diao, Kaiyue; Lin, Bin; Zhu, Xiqi; Li, Kunwei; Li, Shaolin; Shan, Hong; Jacobi, Adam; Chung, Michael	Radiology
Comments on "Preliminary estimation of the basic reproduction number of novel Coronavirus (2019-nCoV) in China, from 2019 to 2020: A data-driven Analysis in the early phase of the outbreak"	10.1016/j.ijid.2020.02.024	2020-02-20		2020-02-06		Correspondence		Dhungana, Hom Nath	International Journal of Infectious Diseases
The basic reproduction number of novel coronavirus (2019-nCoV) estimation based on exponential growth in the early outbreak in China from 2019 to 2020: A reply to Dhungana	10.1016/j.ijid.2020.02.025	2020-02-20		2020-02-12		Correspondence		Zhao, Shi; Lin, Qianyin; Ran, Jinjun; Musa, Salihu S.; Yang, Guangpu; Wang, Weiming; Lou, Yijun; Gao, Daozhou; Yang, Lin; He, Daihai; Wang, Maggie H.	International Journal of Infectious Diseases
Preparedness and vulnerability of African countries against importations of COVID-19: a modelling study	10.1016/S0140-6736(20)30411-6	2020-02-20	2020-02-11			Research		Marius Gilbert, Giulia Pullano, Francesco Pinotti, Eugenio Valdano, Chiara Poletto, Pierre-Yves Boëlle, Eric D’Ortenzio, Yazdan Yazdanpanah,; Serge Paul Eholie, Mathias Altmann, Bernardo Gutierrez, Moritz U G Kraemer, Vittoria Colizza	The Lancet
Early epidemiological analysis of the coronavirus disease 2019 outbreak based on crowdsourced data: a population-level observational study	10.1016/S2589-7500(20)30026-1	2020-02-20	2020-01-31			Research		Sun, Kaiyuan; Chen, Jenny; Viboud, Cécile	The Lancet Digital Health
COVID-19 and artificial intelligence: protecting health-care workers and curbing the spread	10.1016/S2589-7500(20)30054-6	2020-02-20				News Item		McCall, Becky	The Lancet Digital Health
Crowdsourcing data to mitigate epidemics	10.1016/S2589-7500(20)30055-8	2020-02-20	2020-01-29			Commentary		Leung, Gabriel M.; Leung, Kathy	The Lancet Digital Health
Enteric involvement of coronaviruses: is faecal–oral transmission of SARS-CoV-2 possible?	10.1016/S2468-1253(20)30048-0	2020-02-20				Commentary		Yeo, Charleen; Kaushal, Sanghvi; Yeo, Danson	The Lancet Gastroenterology & Hepatology
Viral Load Kinetics of SARS-CoV-2 Infection in First Two Patients in Korea	10.3346/jkms.2020.35.e86	2020-02-20		2020-02-14	2020-02-19	Case Study		['Kim, Jin Yong', 'Ko, Jae-Hoon', 'Kim, Yeonjae', 'Kim, Yae-Jean', 'Kim, Jeong-Min', 'Chung, Yoon-Seok', 'Kim, Heui Man', 'Han, Myung-Guk', 'Kim, So Yeon', 'Chin, Bum Sik']	Journal Korean Med Sci
The Author's Response: Case of the Index Patient Who Caused Tertiary Transmission of Coronavirus Disease 2019 in Korea: the Application of Lopinavir/Ritonavir for the Treatment of COVID-19 Pneumonia Monitored by Quantitative RT-PCR	10.3346/jkms.2020.35.e89	2020-02-20		2020-02-15	2020-02-17	Correspondence		Lim, Jaegyun; Jeon, Seunghyun; Shin, Hyun Young; Kim, Moon Jung; Seong, Yu Min; Lee, Wang Jun; Choe, Kang Won; Kang, Yu Min; Lee, Baeckseung; Park, Sang Joon	Journal Korean Med Sci
COVID-19 in Singapore—Current Experience: Critical Global Issues That Require Attention and Action	10.1001/jama.2020.2467	2020-02-20	2020-02-19			Commentary	Corrected March 4	Wong, John E. L.; Leo, Yee Sin; Tan, Chorh Chuan	JAMA
In silico screening of Chinese herbal medicines with the potential to directly inhibit 2019 novel coronavirus	10.1016/j.joim.2020.02.005	2020-02-20	2020-02-02	2020-02-07	2020-02-13	Research		Zhang, Deng-hai; Wu, Kun-lun; Zhang, Xue; Deng, Sheng-qiong; Peng, Bin	Journal of Integrative Medicine
Another coronavirus, another epidemic, another warning	10.1016/j.vaccine.2020.02.039	2020-02-20	2020-02-12	2020-02-14	2020-02-14	Editorial		Poland, Gregory A.	Vaccine
Quantifying the association between domestic travel and the exportation of novel coronavirus (2019-nCoV) cases from Wuhan, China in 2020: A correlational analysis	10.1093/jtm/taaa022	2020-02-20		2020-02-02	2020-02-11	Research		Zhao, Shi; Zhuang, Zian; Cao, Peihua; Ran, Jinjun; Gao, Daozhou; Lou, Yijun; Yang, Lin; Cai, Yongli; Wang, Weiming; He, Daihai; Wang, Maggie H.	Journal of Travel Medicine
The epidemic of 2019-novel-coronavirus (2019-nCoV) pneumonia and insights for emerging infectious diseases in the future	10.1016/j.micinf.2020.02.002	2020-02-20	2020-02-06	2020-02-07	2020-02-11	Review		Li, Jin-Yan; You, Zhi; Wang, Qiong; Zhou, Zhi-Jian; Qiu, Ye; Luo, Rui; Ge, Xing-Yi	Microbes and Infection
Lessons learned from the 2019-nCoV epidemic on prevention of future infectious diseases	10.1016/j.micinf.2020.02.004	2020-02-20	2020-02-09	2020-02-11	2020-02-12	Commentary		Pan, Xingchen; Ojcius, David M.; Gao, Tianyue; Li, Zhongsheng; Pan, Chunhua; Pan, Chungen	Microbes and Infection
Pandemic: examining readiness for infectious disease outbreaks	10.1016/S2213-2600(20)30082-5	2020-02-20				Spotlight		Burki, Talha Khan	The Lancet Respiratory Medicine
Scientists question China’s decision not to report symptom-free coronavirus cases	10.1038/d41586-020-00434-5	2020-02-20				News Item			Nature
Presumed Asymptomatic Carrier Transmission of COVID-19	10.1001/jama.2020.2565	2020-02-21	2020-02-11			Case study		Bai, Yan; Yao, Lingsheng; Wei, Tao; Tian, Fei; Jin, Dong-Yan; Chen, Lijuan; Wang, Meiyun	JAMA
Global challenges in health and health care for nurses and midwives everywhere	10.1111/inr.12578	2020-02-21				Perspective		Catton, H.	Int Nurs Rev
COVID-2019: the role of the nsp2 and nsp3 in its pathogenesis	10.1002/jmv.25719	2020-02-21	2020-02-12	2020-02-13	2020-02-19	Research		Angeletti, Silvia; Benvenuto, Domenico; Bianchi, Martina; Giovanetti, Marta; Pascarella, Stefano; Ciccozzi, Massimo	Journal of Medical Virology
Communicating the Risk of Death from Novel Coronavirus Disease (COVID-19)	10.3390/jcm9020580	2020-02-21	2020-02-14	2020-02-15	2020-02-17	Editorial		Kobayashi, Tetsuro; Jung, Sung-mok; Linton, M. Natalie; Kinoshita, Ryo; Hayashi, Katsuma; Miyama, Takeshi; Anzai, Asami; Yang, Yichi; Yuan, Baoyin; Akhmetzhanov, R. Andrei; Suzuki, Ayako; Nishiura, Hiroshi	Journal of Clinical Medicine
Challenges and responsibilities of family doctors in the new global coronavirus outbreak	10.1136/fmch-2020-000333	2020-02-21				Editorial		Li, Donald Kwok Tung	Fam Med Community Health
Potential benefits of precise corticosteroids therapy for severe 2019-nCoV pneumonia	10.1038/s41392-020-0127-9	2020-02-21	2020-02-09	2020-02-13	2020-02-17	Case Study		Gao, Wei Zhou; Yisi, Liu; Dongdong, Tian; Cheng, Wang; Sa, Wang; Jing, Cheng; Ming, Hu; Minghao, Fang; Yue	Signal Transduction and Targeted Therapy
Coronavirus Disease 2019 (COVID-19): A Perspective from China	10.1148/radiol.2020200490	2020-02-21	2020-02-19			Review		Zu, Zi Yue; Jiang, Meng Di; Xu, Peng Peng; Chen, Wen; Ni, Qian Qian; Lu, Guang Ming; Zhang, Long Jiang	Radiology
Novel Coronavirus disease 2019 (COVID-19): The importance of recognising possible early ocular manifestation and using protective eyewear	10.1136/bjophthalmol-2020-315994	2020-02-21				Editorial		Li, Ji-Peng Olivia; Lam, Dennis Shun Chiu; Chen, Youxin; Ting, Daniel Shu Wei	Br Journal Ophthalmol
Genetic diversity and evolution of SARS-CoV-2	10.1016/j.meegid.2020.104260	2020-02-21		2020-02-17	2020-02-20	Research		Phan, Tung	Infection, Genetics and Evolution
Chest CT Findings in Patients with Corona Virus Disease 2019 and its Relationship with Clinical Features	10.1097/RLI.0000000000000670	2020-02-21		2020-02-12	2020-02-19	Case Study		Wu, Jiong; Wu, Xiaojia; Zeng, Wenbing; Guo, Dajing; Fang, Zheng; Chen, Linli; Huang, Huizhe; Li, Chuanming	Invest Radiol
COVID-19 in the Shadows of MERS-CoV in the Kingdom of Saudi Arabia	10.2991/jegh.k.200218.003	2020-02-21	2020-02-11	2020-02-16	2020-02-16	Commentary		Memish, Mazin Barry; Maha Al, Amri; Ziad, A.	Journal of Epidemiology and Global Health
The non-contact handheld cutaneous infra-red thermometer for fever screening during the COVID-19 global emergency	10.1016/j.jhin.2020.02.010	2020-02-21		2020-02-11	2020-02-17	Commentary		Aw, Dr Junjie	Journal of Hospital Infection
The continuous evolution and dissemination of 2019 novel human coronavirus	10.1016/j.jinf.2020.02.001	2020-02-21	2020-02-04		2020-02-07	Commentary		Zhang, Jiahao; Ma, Kaixiong; Li, Huanan; Liao, Ming; Qi, Wenbao	Journal of Infection
Novel coronavirus (2019-nCoV) cases in Hong Kong and implications for further spread	10.1016/j.jinf.2020.02.002	2020-02-21	2020-02-01		2020-02-07	Commentary		Kwok, Kin On; Wong, Valerie; Wei, Vivian Wan In; Wong, Samuel Yeung Shan; Tang, Julian Wei-Tze	Journal of Infection
Chinese medical personnel against the 2019-nCoV	10.1016/j.jinf.2020.02.011	2020-02-21	2020-02-05		2020-02-07	Correspondance		Feng, Zhan-hui; Cheng, Yong-ran; Chen, Juan; Ye, Lan; Zhou, Meng-Yun; Wang, Ming-Wei	Journal of Infection
Analysis of angiotensin-converting enzyme 2 (ACE2) from different species sheds some light on cross-species receptor usage of a novel coronavirus 2019-nCoV	10.1016/j.jinf.2020.02.013	2020-02-21			2020-02-12	Research		Li, Rui; Qiao, Songlin; Zhang, Gaiping	Journal of Infection
The New Coronavirus, the Current King of China	10.1093/jpids/piaa018	2020-02-21		2020-02-09	2020-02-12	Commentary		Plotkin, Stanley A.	Journal of the Pediatric Infectious Diseases Society
One world, one health: The novel coronavirus COVID-19 epidemic	10.1016/j.medcli.2020.02.002	2020-02-21				Editorial		Trilla, Antoni	Med Clin (Barc)
In Case You Haven't Heard…	10.1002/mhw.32253	2020-02-21	2020-02-15			Editorial			Mental Health Weekly
‘No one is allowed to go out’: your stories from the coronavirus outbreak	10.1038/d41586-020-00478-7	2020-02-21				News Item		Stoye, Emma	Nature
Coronavirus Disease 2019: Coronaviruses and Blood Safety	10.1016/j.tmrv.2020.02.003	2020-02-21	2020-02-10			Review		Chang, Le; Yan, Ying; Wang, Lunan	Transfusion Medicine Reviews
Short-term Forecasts of the COVID-19 Epidemic in Guangdong and Zhejiang, China: February 13–23, 2020	10.3390/jcm9020596	2020-02-22	2020-02-13	2020-02-14	2020-02-19	Research		Roosa, Kimberlyn; Lee, Yiseul; Luo, Ruiyan; Kirpich, Alexander; Rothenberg, Richard; Hyman, M. James; Yan, Ping; Chowell, Gerardo	Journal of Clinical Medicine
Systematic Comparison of Two Animal-to-Human Transmitted Human Coronaviruses: SARS-CoV-2 and SARS-CoV	10.3390/v12020244	2020-02-22		2020-02-04	2020-02-20	Review		Xu, Jiabao; Zhao, Shizhe; Teng, Tieshan; Abdalla, Abualgasim Elgaili; Zhu, Wan; Xie, Longxiang; Wang, Yunlong; Guo, Xiangqian	Viruses
(18)F-FDG PET/CT findings of COVID-19: a series of four highly suspected cases	10.1007/s00259-020-04734-w	2020-02-22	2020-02-01	2020-02-10	2020-02-17	Case Study		Qin, Chunxia; Liu, Fang; Yen, Tzu-Chen; Lan, Xiaoli	Eur Journal Nucl Med Mol Imaging
Puzzle of highly pathogenic human coronaviruses (2019-nCoV)	10.1007/s13238-020-00693-y	2020-02-22				Commentary		Li, Jing; Liu, Wenjun	Protein Cell
Estimation of the reproductive number of Novel Coronavirus (COVID-19) and the probable outbreak size on the Diamond Princess cruise ship: A data-driven analysis	10.1016/j.ijid.2020.02.033	2020-02-22	2020-02-16	2020-02-15	2020-02-18	Research		Zhang, Sheng; Diao, MengYuan; Yu, Wenbo; Pei, Lei; Lin, Zhaofen; Chen, Dechang	International Journal of Infectious Diseases
Asymptomatic novel coronavirus pneumonia patient outside WuHan: The value of CT images in the course of the disease	10.1016/j.clinimag.2020.02.008	2020-02-22	2020-02-14	2020-02-13	2020-02-20	Case Study		Lin, Chen; Ding, Yuxiao; Xie, Bin; Sun, Zhujian; Li, Xiaogang; Chen, Zixian; Niu, Meng	Clinical Imaging
World Economic Prospects Monthly	10.1111/1468-0319.12472	2020-02-22				Commentary			Economic Outlook
The SARS, MERS and novel coronavirus (COVID-19) epidemics, the newest and biggest global health threats: what lessons have we learned?	10.1093/ije/dyaa033	2020-02-22		2020-02-10	2020-02-12	Review		Peeri, Noah C.; Shrestha, Nistha; Rahman, Md Siddikur; Zaki, Rafdzah; Tan, Zhengqi; Bibi, Saana; Baghbanzadeh, Mahdi; Aghamohammadi, Nasrin; Zhang, Wenyi; Haque, Ubydul	International Journal of Epidemiology
COVID-19: fighting panic with information	10.1016/S0140-6736(20)30379-2	2020-02-22	2020-02-18			Editorial		The, Lancet	The Lancet
Offline: Facts are not enough	10.1016/S0140-6736(20)30405-0	2020-02-22				Commentary		Horton, Richard	The Lancet
Clinical Features of Atypical 2019 Novel Coronavirus Pneumonia with an initially Negative RT-PCR Assay	10.1016/j.jinf.2020.02.008	2020-02-22	2020-02-14		2020-02-17	Case Study		Hao, Wendong	Journal of Infection
Novel coronavirus 2019 (COVID-19): Emergence and implications for emergency care	10.1002/emp2.12034	2020-02-22	2020-02-09	2020-02-01	2020-02-11	Review		Yee, Jane; Unger, Lucy; Zadravecz, Frank; Cariello, Paloma; Seibert, Allan; Johnson, Michael Austin; Fuller, Matthew Joseph	Journal of the American College of Emergency Physicians Open
Is COVID-19 Receiving ADE From Other Coronaviruses?	10.1016/j.micinf.2020.02.006	2020-02-22		2020-02-12	2020-02-13	Commentary		Tetro, Jason A.	Microbes and Infection
Emergence of Novel Coronavirus 2019-nCoV: Need for Rapid Vaccine and Biologics Development	10.3390/pathogens9020148	2020-02-22	2020-02-08	2020-02-11	2020-02-21	Review		Shanmugaraj, Balamurugan; Malla, Ashwini; Phoolcharoen, Waranyoo	Pathogens
Novel Viruses, Zoonotic Infections, and Travel Health	10.1016/j.nwh.2020.02.002	2020-02-23	late January			Commentary		Brucker, Mary C.	Nursing for Women's Health
Characteristics of and Important Lessons From the Coronavirus Disease 2019 (COVID-19) Outbreak in China	10.1001/jama.2020.2648	2020-02-24	2020-02-11			Review		Wu, Zunyou; McGoogan, Jennifer M.	JAMA
Comparative genetic analysis of the novel coronavirus (2019-nCoV/SARS-CoV-2) receptor ACE2 in different populations	10.1038/s41421-020-0147-1	2020-02-24		2020-02-11	2020-02-16	Research		Cao, Yanan; Li, Lin; Feng, Zhimin; Wan, Shengqing; Huang, Peide; Sun, Xiaohui; Wen, Fang; Huang, Xuanlin; Ning, Guang; Wang, Weiqing	Cell Discovery
From SARS to COVID-19: A previously unknown SARS-CoV-2 virus of pandemic potential infecting humans – Call for a One Health approach	10.1016/j.onehlt.2020.100124	2020-02-24	2020-02-24	2020-02-04	2020-02-22	Review		El Zowalaty, Mohamed E.; Järhult, Josef D.	One Health
High expression of ACE2 receptor of 2019-nCoV on the epithelial cells of oral mucosa	10.1038/s41368-020-0074-x	2020-02-24		2020-02-13	2020-02-15	Research		Xu, Hao', 'Zhong, Liang', 'Deng, Jiaxin', 'Peng, Jiakuan', 'Dan, Hongxia', 'Zeng, Xin', 'Li, Taiwen', 'Chen, Qianming	Int Journal Oral Sci
Facing the COVID-19 outbreak: What should we know and what could we do?	10.1002/jmv.25720	2020-02-24	2020-02-18	2020-02-13	2020-02-21	Commentary		Yang, Yi; Shang, Weilong; Rao, Xiancai	Journal of Medical Virology
Assessing the Impact of Reduced Travel on Exportation Dynamics of Novel Coronavirus Infection (COVID-19)	10.3390/jcm9020601	2020-02-24	2020-02-12	2020-02-13	2020-02-20	Research		Anzai, Asami; Kobayashi, Tetsuro; Linton, M. Natalie; Kinoshita, Ryo; Hayashi, Katsuma; Suzuki, Ayako; Yang, Yichi; Jung, Sung-mok; Miyama, Takeshi; Akhmetzhanov, R. Andrei; Nishiura, Hiroshi	Journal of Clinical Medicine
Coronavirus Disease 2019 (COVID-19) and Pregnancy: What obstetricians need to know	10.1016/j.ajog.2020.02.017	2020-02-24	2020-02-16	2020-02-12	2020-02-18	Review		Rasmussen, Sonja A.; Smulian, John C.; Lednicky, John A.; Wen, Tony S.; Jamieson, Denise J.	American Journal of Obstetrics and Gynecology
Phase-adjusted estimation of the number of Coronavirus Disease 2019 cases in Wuhan, China	10.1038/s41421-020-0148-0	2020-02-24	2020-02-17	2020-02-12	2020-02-17	Research	There is Jan.18 data in the method	Wang, Huwen; Wang, Zezhou; Dong, Yinqiao; Chang, Ruijie; Xu, Chen; Yu, Xiaoyue; Zhang, Shuxian; Tsamlag, Lhakpa; Shang, Meili; Huang, Jinyan; Wang, Ying; Xu, Gang; Shen, Tian; Zhang, Xinxin; Cai, Yong	Cell Discovery
Epitopes for a 2019-nCoV vaccine	10.1038/s41423-020-0377-z	2020-02-24		2020-02-10	2020-02-11	Correspondence		Lucchese, Guglielmo	Cellular & Molecular Immunology
Functional assessment of cell entry and receptor usage for SARS-CoV-2 and other lineage B betacoronaviruses	10.1038/s41564-020-0688-y	2020-02-24		2020-02-03	2020-02-11	Research		Letko, Michael; Marzi, Andrea; Munster, Vincent	Nat Microbiol
Initial public health response and interim clinical guidance for the 2019 novel coronavirus outbreak - United States, December 31, 2019-February 4, 2020	10.1111/ajt.15805	2020-02-24	2020-02-04			Report		Patel, Anita; Jernigan, Daniel B.; nCo, V. C. D. C. Response Team	Am Journal Transplant
Coronavirus Disease 2019: Implications of Emerging Infections for Transplantation	10.1111/ajt.15832	2020-02-24	2020-02-15	2020-02-11	2020-02-20	Commentary		Michaels, Marian G.; La Hoz, Ricardo M.; Danziger Isakov, Lara; Blumberg, Emily A.; Kumar, Deepali; Green, Michael; Pruett, Timothy L.; Wolfe, Cameron R.	Am Journal Transplant
Coronavirus disease 2019 outbreak: Preparedness and readiness of countries in the eastern mediterranean region	10.26719/2020.26.2.136	2020-02-24				Commentary		Al-Mandhari, A.; Samhouri, D.; Abubakar, A.; Brennan, R.	Eastern Mediterranean Health Journal
COVID-19 R0: Magic number or conundrum?	10.4081/idr.2020.8516	2020-02-24	2020-02-20	2020-02-21	2020-02-24	Editorial		Petrosillo, Giulio Viceconte; Nicola	Infectious Disease Reports
The antiviral compound remdesivir potently inhibits RNA-dependent RNA polymerase from Middle East respiratory syndrome coronavirus	10.1074/jbc.AC120.013056	2020-02-24				Research		Gordon, Calvin J.; Tchesnokov, Egor P.; Feng, Joy Y.; Porter, Danielle P.; Gotte, Matthias	Journal Biol Chem
Scientists are sprinting to outpace the novel coronavirus	10.1016/S0140-6736(20)30420-7	2020-02-24	2020-02-20			Commentary		Ghebreyesus, Tedros Adhanom; Swaminathan, Soumya	The Lancet
Radiological findings from 81 patients with COVID-19 pneumonia in Wuhan, China: a descriptive study	10.1016/S1473-3099(20)30086-4	2020-02-24	2020-02-15			Case Study		Shi, Heshui; Han, Xiaoyu; Jiang, Nanchuan; Cao, Yukun; Alwalid, Osamah; Gu, Jin; Fan, Yanqing; Zheng, Chuansheng	The Lancet Infectious Diseases
Viral load of SARS-CoV-2 in clinical samples	10.1016/S1473-3099(20)30113-4	2020-02-24				Case Study		Pan, Yang; Zhang, Daitao; Yang, Peng; Poon, Leo L. M.; Wang, Quanyi	The Lancet Infectious Diseases
Correction to <em>Lancet Infect Dis</em> 2020; published online Feb 18. https://doi.org/10.1016/S1473-3099(20)30111-0	10.1016/S1473-3099(20)30128-6	2020-02-24				Correction			The Lancet Infectious Diseases
COVID-19 pneumonia: what has CT taught us?	10.1016/S1473-3099(20)30134-1	2020-02-24				Commentary		Lee, Elaine Y. P.; Ng, Ming-Yen; Khong, Pek-Lan	The Lancet Infectious Diseases
Clinical course and outcomes of critically ill patients with SARS-CoV-2 pneumonia in Wuhan, China: a single-centered, retrospective, observational study	10.1016/S2213-2600(20)30079-5	2020-02-24	2020-02-09			Case Study		Yang, Xiaobo; Yu, Yuan; Xu, Jiqian; Shu, Huaqing; Xia, Jia'an; Liu, Hong; Wu, Yongran; Zhang, Lu; Yu, Zhui; Fang, Minghao; Yu, Ting; Wang, Yaxin; Pan, Shangwen; Zou, Xiaojing; Yuan, Shiying; Shang, You	The Lancet Respiratory Medicine
Staff safety during emergency airway management for COVID-19 in Hong Kong	10.1016/S2213-2600(20)30084-9	2020-02-24				Correspondence		Cheung, Jonathan Chun-Hei; Ho, Lap Tin; Cheng, Justin Vincent; Cham, Esther Yin Kwan; Lam, Koon Ngai	The Lancet Respiratory Medicine
Unveiling the Origin and Transmission of 2019-nCoV	10.1016/j.tim.2020.02.001	2020-02-24	2020-02-08			Spotlight		Xu, Yifei	Trends in Microbiology
Challenges and countermeasures for organ donation during the SARS-CoV-2 epidemic: the experience of Sichuan Provincial People’s Hospital	10.1007/s00134-020-05978-8	2020-02-25	2020-02-17		2020-02-19	Correspondance		Pan, Lingai; Zeng, Jie; Yang, Hongji	Intensive Care Medicine
Combination of RT-qPCR Testing and Clinical Features For Diagnosis of COVID-19 facilitates management of SARS-CoV-2 Outbreak	10.1002/jmv.25721	2020-02-25	2020-02-15	2020-02-17	2020-02-22	Commentary		Wang, Yishan; Kang, Hanyujie; Liu, Xuefeng; Tong, Zhaohui	Journal of Medical Virology
Understanding of COVID-19 based on current evidence	10.1002/jmv.25722	2020-02-25	2020-02-23	2020-02-05	2020-02-22	Review		Sun, Pengfei; Lu, Xiaosheng; Xu, Chao; Sun, Wenjuan; Pan, Bo	Journal of Medical Virology
Early Phylogenetic Estimate of the Effective Reproduction Number Of Sars-CoV-2	10.1002/jmv.25723	2020-02-25	2020-02-04	2020-02-14	2020-02-21	Research		Lai, Alessia; Bergna, Annalisa; Acciarri, Carla; Galli, Massimo; Zehender, Gianguglielmo	Journal of Medical Virology
The Risk and Prevention of Novel Coronavirus Pneumonia Infections Among Inpatients in Psychiatric Hospitals	10.1007/s12264-020-00476-9	2020-02-25	2020-02-12	2020-02-14	2020-02-16	Recommendation		Zhu, Yuncheng; Chen, Liangliang; Ji, Haifeng; Xi, Maomao; Fang, Yiru; Li, Yi	Neuroscience Bulletin
Preliminary Identification of Potential Vaccine Targets for the COVID-19 Coronavirus (SARS-CoV-2) Based on SARS-CoV Immunological Studies	10.3390/v12030254	2020-02-25	2020-02-21	2020-02-09		Research		Ahmed, F. Syed; Quadeer, A. Ahmed; McKay, R. Matthew	Viruses
Covid-19: surge in cases in Italy and South Korea makes pandemic look more likely	10.1136/bmj.m751	2020-02-25	2020-02-25			News Item		Day, Michael	BMJ
The 2019 novel cornoavirus pneumonia with onset of oculomotor nerve palsy: a case study	10.1007/s00415-020-09773-9	2020-02-25		2020-02-19	2020-02-20	Case Study		Wei, Heng; Yin, Hongxiang; Huang, Min; Guo, Zhenli	Journal of Neurology
A Novel Approach of Consultation on 2019 Novel Coronavirus (COVID-19)-Related Psychological and Mental Problems: Structured Letter Therapy	10.30773/pi.2020.0047	2020-02-25	2020-02-03	2020-02-10	2020-02-12	Correspondence		Xiao, Chunfeng	Psychiatry Investig
Mental Health Care Measures in Response to the 2019 Novel Coronavirus Outbreak in Korea	10.30773/pi.2020.0058	2020-02-25				Editorial		['Park, Seon-Cheol', 'Park, Yong Chon']	Psychiatry Investig
Wuhan novel coronavirus (COVID-19): why global control is challenging?	10.1016/j.puhe.2020.02.001	2020-02-25	2020-01-31			Editorial		Lee, A.	Public Health
Anesthesia Procedure of Emergency Operation for Patients with Suspected or Confirmed COVID-19	10.1089/sur.2020.040	2020-02-25				Commentary		Wen, Xianjie; Li, Yiqun	Surg Infect (Larchmt)
COVID-19: Real-time dissemination of scientific information to fight a public health emergency of international concern	10.5582/bst.2020.01056	2020-02-25	2020-02-23	2020-02-23	2020-02-24	Editorial		Song, Peipei; Karako, Takashi	Biosci Trends
Emergent Strategies for the Next Phase of COVID-19		2020-02-25		2020-02-20	2020-02-24	Editorial		Huh, Kyungmin; Shin, Hyoung Shik; Peck, Kyong Ran	Infection & Chemotherapy
2019 novel coronavirus infection and gastrointestinal tract	10.1111/1751-2980.12851	2020-02-25	2020-02-21	2020-02-20	2020-02-20	Editorial		Gao, Qin Yan; Chen, Ying Xuan; Fang, Jing Yuan	Journal of Digestive Disease
Recent insights into 2019-nCoV: a brief but comprehensive review	10.1016/j.jinf.2020.02.010	2020-02-25	2020-02-09		2020-02-11	Review		Han, Qingmei; Lin, Qingqing; Jin, Shenhe; You, Liangshun	Journal of Infection
Are children less susceptible to COVID-19?	10.1016/j.jmii.2020.02.011	2020-02-25	2020-02-11	2020-02-21	2020-02-21	Perspective		Lee, Ping-Ing; Hu, Ya-Li; Chen, Po-Yen; Huang, Yhu-Chering; Hsueh, Po-Ren	Journal of Microbiology, Immunology and Infection
Time to use the p-word? Coronavirus enters dangerous new phase	10.1038/d41586-020-00551-1	2020-02-25	2020-02-25			News Item	Clarification Feb.27	Callaway, Ewen	Nature
Potential association between COVID-19 mortality and health-care resource availability	10.1016/S2214-109X(20)30068-1	2020-02-25	2020-02-16			Correspondance		Ji, Yunpeng; Ma, Zhongren; Peppelenbosch, Maikel P.; Pan, Qiuwei	The Lancet Global Health
Correction to <em>Lancet Respir Med</em> 2020; published online Feb 17. https://doi.org/10.1016/S2213-2600(20)30076-X	10.1016/S2213-2600(20)30085-0	2020-02-25				Correction			The Lancet Respiratory Medicine
The epidemiology and pathogenesis of coronavirus disease (COVID-19) outbreak	10.1016/j.jaut.2020.102433	2020-02-26	2020-02-16	2020-02-10	2020-02-18	Review		Rothan, Hussin A.; Byrareddy, Siddappa N.	Journal of Autoimmunity
Corona Virus International Public Health Emergencies: Implications for Radiology Management	10.1016/j.acra.2020.02.003	2020-02-26		2020-02-10	2020-02-13	Commentary		Zhang, Han-Wen; Yu, Juan; Xu, Hua-Jian; Lei, Yi; Pu, Zu-Hui; Dai, Wei-Cai; Lin, Fan; Wang, Yu-Li; Wu, Xiao-Liu; Liu, Li-Hong; Li, Min; Mo, Yong-Qian; Zhang, Hong; Luo, Si-Ping; Chen, Huan; Lyu, Gui-Wen; Zhou, Zhao-Guang; Liu, Wei-Min; Liu, Xiao-Lei; Song, Hai-Yan; Chen, Fu-Zhen; Zeng, Liang; Zhong, Hua; Guo, Ting-Ting; Hu, Ya-Qiong; Yang, Xin-Xin; Liu, Pin-Ni; Li, Ding-Fu	Academic Radiology
Severe SARS-CoV-2 infections: practical considerations and management strategy for intensivists	10.1007/s00134-020-05967-x	2020-02-26	2020-02-03	2020-02-04	2020-02-10	Recommendation		Bouadma, Lila; Lescure, Francois-Xavier; Yazdanpanah, Yazdan; Timsit, Jean-Francois	Intensive Care Medicine
Evaluation of coronavirus in tears and conjunctival secretions of patients with SARS-CoV-2 infection	10.1002/jmv.25725	2020-02-26	2020-02-18	2020-02-19	2020-02-24	Research		Xia, Jianhua; Tong, Jianping; Liu, Mengyun; Shen, Ye; Guo, Dongyu	Journal of Medical Virology
Composition and divergence of coronavirus spike proteins and host ACE2 receptors predict potential intermediate hosts of SARS-CoV-2	10.1002/jmv.25726	2020-02-26	2020-02-18	2020-02-18	2020-02-24	Research		Liu, Zhixin; Xiao, Xiao; Wei, Xiuli; Li, Jian; Yang, Jing; Tan, Huabing; Zhu, Jianyong; Zhang, Qiwei; Wu, Jianguo; Liu, Long	Journal of Medical Virology
Potential Rapid Diagnostics, Vaccine and Therapeutics for 2019 Novel Coronavirus (2019-nCoV): A Systematic Review	10.3390/jcm9030623	2020-02-26	2020-02-06	2020-02-13	2020-02-19	Review		Pang, Junxiong; Wang, Min Xian; Ang, Ian Yi Han; Tan, Sharon Hui Xuan; Lewis, Ruth Frances; Chen, Jacinta I. Pei; Gutierrez, Ramona A.; Gwee, Sylvia Xiao Wei; Chua, Pearleen Ee Yong; Yang, Qian; Ng, Xian Yi; Yap, Rowena K. S.; Tan, Hao Yi; Teo, Yik Ying; Tan, Chorh Chuan; Cook, Alex R.; Yap, Jason Chin-Huat; Hsu, Li Yang	Journal of Clinical Medicine
Negative Nasopharyngeal and Oropharyngeal Swab Does Not Rule Out COVID-19	10.1128/jcm.00297-20	2020-02-26	2020-01-21			Case study		Winichakoon, P.; Chaiwarith, R.; Liwsrisakun, C.; Salee, P.; Goonna, A.; Limsukon, A.; Kaewpoowat, Q.	Journal of clinical microbiology
A time delay dynamic system with external source for the local outbreak of 2019-nCoV	10.1080/00036811.2020.1732357	2020-02-26		2020-02-07	2020-02-16	Research		Chen, Yu; Cheng, Jin; Jiang, Yu; Liu, Keji	Applicable Analysis
Fear can be more harmful than the severe acute respiratory syndrome coronavirus 2 in controlling the corona virus disease 2019 epidemic	10.12998/wjcc.v8.i4.652	2020-02-26	2020-02-16	2020-02-21	2020-02-12	Recommendation	as of February 18	['Ren, Shi-Yan', 'Gao, Rong-Ding', 'Chen, Ye-Lin']	World Journal Clin Cases
Covid-19: Italy confirms 11 deaths as cases spread from north	10.1136/bmj.m757	2020-02-26	2020-02-26			News Item		Day, M.	BMJournal (Clinical research ed.)
Diarrhoea may be underestimated: a missing link in 2019 novel coronavirus	10.1136/gutjnl-2020-320832	2020-02-26		2020-02-05	2020-02-13	Commentary		Liang, W.; Feng, Z.; Rao, S.; Xiao, C.; Xue, X.; Lin, Z.; Zhang, Q.; Qi, W.	Gut
Detectable 2019-nCoV viral RNA in blood is a strong indicator for the further clinical severity	10.1080/22221751.2020.1732837	2020-02-26	2020-02-06	2020-02-08	2020-02-15	Case Study		Chen, W.; Lan, Y.; Yuan, X.; Deng, X.; Li, Y.; Cai, X.; Li, L.; He, R.; Tan, Y.; Gao, M.; Tang, G.; Zhao, L.; Wang, J.; Fan, Q.; Wen, C.; Tong, Y.; Tang, Y.; Hu, F.; Li, F.; Tang, X.	Emerging microbes & infections
No credible evidence supporting claims of the laboratory engineering of SARS-CoV-2	10.1080/22221751.2020.1733440	2020-02-26		2020-02-13	2020-02-13	Commentary		Liu, S. L.; Saif, L. J.; Weiss, S. R.; Su, L.	Emerging microbes & infections
Visualising the expansion and spread of coronavirus disease 2019 by cartograms	10.1177/0308518X20910162	2020-02-26	2020-02-07			Commentary		Gao, Peichao; Zhang, Hong; Wu, Zhiwei; Wang, Jicheng	Environment and Planning A: Economy and Space
Old Threat, New Enemy: Is Your Interventional Radiology Service Ready for the Coronavirus Disease 2019?	10.1007/s00270-020-02440-6	2020-02-26		2020-02-04	2020-02-18	Editorial		Da Zhuang, Kun; Tan, Bien Soo; Tan, Ban Hock; Too, Chow Wei; Tay, Kiang Hiong	Cardiovascular and interventional radiology
Psychological crisis interventions in Sichuan Province during the 2019 novel coronavirus outbreak	10.1016/j.psychres.2020.112895	2020-02-26	2020-02-10	2020-02-10	2020-02-23	Commentary		Zhou, Xiaobo	Psychiatry Research
Correlation of Chest CT and RT-PCR Testing in Coronavirus Disease 2019 (COVID-19) in China: A Report of 1014 Cases	10.1148/radiol.2020200642	2020-02-26	2020-02-12			Case Study		Ai, Tao; Yang, Zhenlu; Hou, Hongyan; Zhan, Chenao; Chen, Chong; Lv, Wenzhi; Tao, Qian; Sun, Ziyong; Xia, Liming	Radiology
2019-novel Coronavirus severe adult respiratory distress syndrome in two cases in Italy: An uncommon radiological presentation	10.1016/j.ijid.2020.02.043	2020-02-26	2020-02-13	2020-02-14	2020-02-20	Case Study		Albarello, Fabrizio; Pianura, Elisa; Di Stefano, Federica; Cristofaro, Massimo; Petrone, Ada; Marchioni, Luisa; Palazzolo, Claudia; Schinina, Vincenzo; Nicastri, Emanuele; Petrosillo, Nicola; Campioni, Paolo; Petersen, Eskild; Zumla, Alimuddin; Ippolito, Giuseppe	International Journal of Infectious Diseases
2019 novel coronavirus: an emerging global threat	10.1080/08998280.2020.1731272	2020-02-26	2020-02-11	2020-02-12	2020-02-14	Review		Columbus, Cristie; Brust, Karen B.; Arroliga, Alejandro C.	Baylor University Medical Center Proceedings
De-isolating COVID-19 Suspect Cases: A Continuing Challenge	10.1093/cid/ciaa179	2020-02-26				Correspondence		Tay, Jun-Yang; Lim, Poh Lian; Marimuthu, Kalisvar; Sadarangani, Sapna Pradip; Ling, Li Min; Ang, Brenda Sze Peng; Chan, Monica; Leo, Yee-Sin; Vasoo, Shawn	Clinical Infectious Diseases
Computers and viral diseases. Preliminary bioinformatics studies on the design of a synthetic vaccine and a preventative peptidomimetic antagonist against the SARS-CoV-2 (2019-nCoV, COVID-19) coronavirus	10.1016/j.compbiomed.2020.103670	2020-02-26		2020-02-02	2020-02-17	Research		Robson, B.	Computers in Biology and Medicine
Application of the ARIMA model on the COVID-2019 epidemic dataset	10.1016/j.dib.2020.105340	2020-02-26	2020-02-10	2020-02-14	2020-02-21	Research		Benvenuto, Domenico; Giovanetti, Marta; Vassallo, Lazzaro; Angeletti, Silvia; Ciccozzi, Massimo	Data in Brief
Passengers' destinations from China: low risk of Novel Coronavirus (2019-nCoV) transmission into Africa and South America	10.1017/S0950268820000424	2020-02-26	2020-02-05	2020-02-07	2020-02-09	Research		Haider, Najmul; Yavlinsky, Alexei; Simons, David; Osman, Abdinasir Yusuf; Ntoumi, Francine; Zumla, Alimuddin; Kock, Richard	Epidemiol Infect
Tuberculosis and novel Wuhan coronavirus infection: pathological interrelationship	10.1016/j.ijtb.2020.02.004	2020-02-26	2020-01-21	2020-01-28	2020-02-19	Correspondence		Yasri, Sora; Wiwanitkit, Viroj	Indian Journal of Tuberculosis
The world is changing fast!	10.1111/ijcp.13486	2020-02-26				Editorial		Young, Charles	International Journal of Clinical Practice
World Health Organization declares Global Emergency: A review of the 2019 Novel Coronavirus (COVID-19)	10.1016/j.ijsu.2020.02.034	2020-02-26		2020-02-03	2020-02-24	Review		Sohrabi, Catrin; Alsafi, Zaid; O’Neill, Niamh; Khan, Mehdi; Kerwan, Ahmed; Al-Jabir, Ahmed; Iosifidis, Christos; Agha, Riaz	International Journal of Surgery
Coronavirus Disease 2019 and Influenza	10.1001/jama.2020.2633	2020-02-26				Infographics		Livingston, Edward; Bucher, Karen; Rekito, Andrew	JAMA
Clinical characteristics and imaging manifestations of the 2019 novel coronavirus disease (COVID-19):A multi-center study in Wenzhou city, Zhejiang, China	10.1016/j.jinf.2020.02.016	2020-02-26	2020-02-15		2020-02-21	Case Study		Yang, Wenjie; Cao, Qiqi; Qin, Le; Wang, Xiaoyang; Cheng, Zenghui; Pan, Ashan; Dai, Jianyi; Sun, Qingfeng; Zhao, Fengquan; Qu, Jieming; Yan, Fuhua	Journal of Infection
Simulating and Forecasting the Cumulative Confirmed Cases of SARS-CoV-2 in China by Boltzmann Function-based Regression Analyses	10.1016/j.jinf.2020.02.019	2020-02-26	2020-02-16		2020-02-21	Research		Fu, Xinmiao; Ying, Qi; Zeng, Tieyong; Long, Tao; Wang, Yan	Journal of Infection
First case of Coronavirus Disease 2019 (COVID-19) pneumonia in Taiwan	10.1016/j.jfma.2020.02.007	2020-02-26	2020-02-07	2020-02-16	2020-02-18	Case Study	As of Feb. 18	Cheng, Shao-Chung; Chang, Yuan-Chia; Fan Chiang, Yu-Long; Chien, Yu-Chan; Cheng, Mingte; Yang, Chin-Hua; Huang, Chia-Husn; Hsu, Yuan-Nian	Journal of the Formosan Medical Association
Chest Radiographic and CT Findings of the 2019 Novel Coronavirus Disease (COVID-19): Analysis of Nine Patients Treated in Korea	10.3348/kjr.2020.0132	2020-02-26	2020-02-16	2020-02-17	2020-02-18	Case Study		Yoon, Soon Ho; Lee, Kyung Hee; Kim, Jin Yong; Lee, Young Kyung; Ko, Hongseok; Kim, Ki Hwan; Park, Chang Min; Kim, Yun Hyeon	Korean J Radiol
2019 Novel Coronavirus (COVID-19) Pneumonia: Serial Computer Tomography Findings	10.3348/kjr.2020.0112	2020-02-26	2020-01-30	2020-02-11	2020-02-17	Case Study		Wei, J.; Xu, H.; Xiong, J.; Shen, Q.; Fan, B.; Ye, C.; Dong, W.; Hu, F.	Korean journal of radiology
Escaping Pandora's Box - Another Novel Coronavirus	10.1056/NEJMp2002106	2020-02-26				Perspective		Morens, David M.; Daszak, Peter; Taubenberger, Jeffery K.	N Engl J Med
Mystery deepens over animal source of coronavirus	10.1038/d41586-020-00548-w	2020-02-26				News Item		Cyranoski, David	Nature
COVID-19 and blood safety: help with a dilemma	10.1016/j.tmrv.2020.02.004	2020-02-26	2020-02-15			Commentary		Dodd, Roger Y.; Stramer, Susan L.	Transfusion Medicine Reviews
The COVID-19 outbreak and implications for the Tokyo 2020 Summer Olympic Games	10.1016/j.tmaid.2020.101604	2020-02-26	2020-02-27	2020-02-20	2020-02-21	Editorial		Gallego, Viviana; Nishiura, Hiroshi; Sah, Ranjit; Rodriguez-Morales, Alfonso J.	Travel Medicine and Infectious Disease
‘A completely new culture of doing research.’ Coronavirus outbreak changes how scientists communicate	10.1126/science.abb4761	2020-02-26				News Item	Clarification Feb.27	Kai Kupferschmidt	Sccience
Secondary attack rate and superspreading events for SARS-CoV-2	10.1016/S0140-6736(20)30462-1	2020-02-27	2020-01-28			Research		Liu, Yang; Eggo, Rosalind M.; Kucharski, Adam J.	The Lancet
Positive RT-PCR Test Results in Patients Recovered From COVID-19	10.1001/jama.2020.2783	2020-02-27				Case study		Lan, L.; Xu, D.; Ye, G.; Xia, C.; Wang, S.; Li, Y.; Xu, H.	Jama
Epidemiological Identification of A Novel Pathogen in Real Time: Analysis of the Atypical Pneumonia Outbreak in Wuhan, China, 2019-2020	10.3390/jcm9030637	2020-02-27	2020-01-12	2020-02-08	2020-02-24	Research		Jung, Sung-Mok; Kinoshita, Ryo; Thompson, Robin N.; Linton, Natalie M.; Yang, Yichi; Akhmetzhanov, Andrei R.; Nishiura, Hiroshi	Journal Clin Med
Emergence of a novel human coronavirus threatening human health	10.1038/s41591-020-0796-5	2020-02-27				News Item		Poon, Leo L. M.; Peiris, Malik	Nature Medicine
Coronavirus puts drug repurposing on the fast track	10.1038/d41587-020-00003-1	2020-02-27	2020-02-15			News Item		Harrison, Charlotte	Nature Biotechnology
Covid-19: Trump says risk to Americans is "very low"	10.1136/bmj.m793	2020-02-27	2020-02-27			News Item		Tanne, J. H.	BMJournal (Clinical research ed.)
Analysis of therapeutic targets for SARS-CoV-2 and discovery of potential drugs by computational methods	10.1016/j.apsb.2020.02.008	2020-02-27		2020-02-12	2020-02-18	Research		Wu, Canrong; Liu, Yang; Yang, Yueying; Zhang, Peng; Zhong, Wu; Wang, Yali; Wang, Qiqi; Xu, Yang; Li, Mingxue; Li, Xingzhou; Zheng, Mengzhu; Chen, Lixia; Li, Hua	Acta Pharmaceutica Sinica B
Fear of COVID 2019: First suicidal case in India !	10.1016/j.ajp.2020.101989	2020-02-27	2020-02-12	2020-02-18		Case Study		Goyal, Kapil; Chauhan, Poonam; Chhikara, Komal; Gupta, Parakriti; Singh, Mini P.	Asian Journal of Psychiatry
COVID-19: Lessons from SARS and MERS	10.1002/eji.202070035	2020-02-27	2020-02-24			News Item		Park, Mirae; Thwaites, Ryan S.; Openshaw, Peter J. M.	European journal of immunology
Early transmission patterns of coronavirus disease 2019 (COVID-19) in travellers from Wuhan to Thailand, January 2020	10.2807/1560-7917.ES.2020.25.8.2000097	2020-02-27	2020-01-23	2020-02-06	2020-02-27	Case Study		Okada, Pilailuk; Buathong, Rome; Phuygun, Siripaporn; Thanadachakul, Thanutsapa; Parnmen, Sittiporn; Wongboot, Warawan; Waicharoen, Sunthareeya; Wacharapluesadee, Supaporn; Uttayamakul, Sumonmal; Vachiraphan, Apichart; Chittaganpitch, Malinee; Mekha, Nanthawan; Janejai, Noppavan; Iamsirithaworn, Sopon; Lee, Raphael TC; Maurer-Stroh, Sebastian	Eurosurveillance
Differential diagnosis of illness in patients under investigation for the novel coronavirus (SARS-CoV-2), Italy, February 2020	10.2807/1560-7917.ES.2020.25.8.2000170	2020-02-27	2020-02-07	2020-02-17	2020-02-26	Case Study		Bordi, Licia; Nicastri, Emanuele; Scorzolini, Laura; Caro, Antonino Di; Capobianchi, Maria Rosaria; Castilletti, Concetta; Lalle, Eleonora; group, on behalf of INMI COVID-19 study; Centers2, Collaborating	Eurosurveillance
Letter to the editor: Plenty of coronaviruses but no SARS-CoV-2	10.2807/1560-7917.ES.2020.25.8.2000171	2020-02-27	2020-02-25	2020-02-21	2020-02-27	Commentary		Colson, Philippe; Scola, Bernard La; Esteves-Vieira, Vera; Ninove, Laetitia; Zandotti, Christine; Jimeno, Marie-Thérese; Gazin, Céline; Bedotto, Marielle; Filosa, Véronique; Giraud-Gatineau, Audrey; Chaudet, Hervé; Brouqui, Philippe; Lagier, Jean-Christophe; Raoult, Didier	Eurosurveillance
Authors’ response: Plenty of coronaviruses but no SARS-CoV-2	10.2807/1560-7917.ES.2020.25.8.2000197	2020-02-27	2020-02-26	2020-02-27	2020-02-27	Commentary		Reusken, Chantal B; Haagmans, Bart; Meijer, Adam; Corman, Victor M; Papa, Anna; Charrel, Remi; Drosten, Christian; Koopmans, Marion	Eurosurveillance
Latest assessment on COVID-19 from the European Centre for Disease Prevention and Control (ECDC)	10.2807/1560-7917.ES.2020.25.8.2002271	2020-02-27				Report		team, Eurosurveillance editorial	Eurosurveillance
Trust is a key factor in the willingness of health professionals to work during the COVID-19 outbreak: Experience from the H1N1 pandemic in Japan 2009	10.1111/pcn.12995	2020-02-27	2020-02-11	2020-02-13	2020-02-25	Commentary		Imai, Hissei	Psychiatry and Clinical Neurosciences
Essentials for Radiologists on COVID-19: An Update-Radiology Scientific Expert Panel	10.1148/radiol.2020200527	2020-02-27				Commentary		Kanne, J. P.; Little, B. P.; Chung, J. H.; Elicker, B. M.; Ketai, L. H.	Radiology
Comparison of different samples for 2019 novel coronavirus detection by nucleic acid amplification tests	10.1016/j.ijid.2020.02.050	2020-02-27	2020-02-01	2020-02-17	2020-02-22	Case Study		Xie, Chunbao; Jiang, Lingxi; Huang, Guo; Pu, Hong; Gong, Bo; Lin, He; Ma, Shi; Chen, Xuemei; Long, Bo; Si, Guo; Yu, Hua; Jiang, Li; Yang, Xingxiang; Shi, Yi; Yang, Zhenglin	International Journal of Infectious Diseases
Outbreak of Novel Coronavirus (SARS-Cov-2): First Evidences From International Scientific Literature and Pending Questions	10.3390/healthcare8010051	2020-02-27		2020-02-24	2020-02-26	Editorial		Lin, Cheng-Wen; Amodio, Emanuele; Vitale, Francesco; Cimino, Livia; Casuccio, Alessandra; Tramuto, Fabio	Healthcare
On the Coronavirus (COVID-19) Outbreak and the Smart City Network: Universal Data Sharing Standards Coupled with Artificial Intelligence (AI) to Benefit Urban Health Monitoring and Management	10.3390/healthcare8010046	2020-02-27	2020-01-30	2020-01-31	2020-02-25	Perspective		Allam, Zaheer; Jones, David S.	Healthcare
Outbreak of Novel Coronavirus (SARS-Cov-2): First Evidences From International Scientific Literature and Pending Questions	10.3390/healthcare8010051	2020-02-27	2020-02-01	2020-02-24	2020-02-26	Editorial		Amodio, Emanuele; Vitale, Francesco; Cimino, Livia; Casuccio, Alessandra; Tramuto, Fabio	Healthcare (Basel)
Outbreak of a new coronavirus: what anaesthetists should know	10.1016/j.bja.2020.02.008	2020-02-27	2020-02-20	2020-02-11	2020-02-12	Recommendation		Peng, Philip W. H.; Ho, Pak-Leung; Hota, Susy S.	British journal of anaesthesia
COVID-19 in medical personnel: observation from Thailand	10.1016/j.jhin.2020.02.016	2020-02-27	2020-02-21	2020-02-22	2020-02-23	Commentary		Joob, Beuy; Wiwanitkit, Viroj	Journal of Hospital Infection
Integrated infection control strategy to minimize nosocomial infection of corona virus disease 2019 among ENT healthcare workers	10.1016/j.jhin.2020.02.018	2020-02-27	2020-02-20	2020-02-12	2020-02-22	Commentary		Lu, Dan; Wang, Haiyang; Yu, Rong; HuiYang; Zhao, Yu	Journal of Hospital Infection
Trend and forecasting of the COVID-19 outbreak in China	10.1016/j.jinf.2020.02.014	2020-02-27	2020-02-11	2020-02-18	2020-02-20	Research		Li, Qiang; Feng, Wei; Quan, Ying-Hui	Journal of Infection
Characteristics of COVID-19 infection in Beijing	10.1016/j.jinf.2020.02.018	2020-02-27	2020-02-10		2020-02-21	Case Study		Tian, Sijia; Hu, Nan; Lou, Jing; Chen, Kun; Kang, Xuqin; Xiang, Zhenjun; Chen, Hui; Wang, Dali; Liu, Ning; Liu, Dong; Chen, Gang; Zhang, Yongliang; Li, Dou; Li, Jianren; Lian, Huixin; Niu, Shengmei; Zhang, Luxi; Zhang, Jinjun	Journal of Infection
Development and Clinical Application of A Rapid IgM-IgG Combined Antibody Test for SARS-CoV-2 Infection Diagnosis	10.1002/jmv.25727	2020-02-27				Research		Li, Zhengtu; Yi, Yongxiang; Luo, Xiaomei; Xiong, Nian; Liu, Yang; Li, Shaoqiang; Sun, Ruilin; Wang, Yanqun; Hu, Bicheng; Chen, Wei; Zhang, Yongchen; Wang, Jing; Huang, Baofu; Lin, Ye; Yang, Jiasheng; Cai, Wensheng; Wang, Xuefeng; Cheng, Jing; Chen, Zhiqiang; Sun, Kangjun; Pan, Weimin; Zhan, Zhifei; Chen, Liyan; Ye, Feng	Journal of Medical Virology
A Systematic Review of Lopinavir Therapy for SARS Coronavirus and MERS Coronavirus–A Possible Reference for Coronavirus Disease-19 Treatment Option	10.1002/jmv.25729	2020-02-27	2020-02-21	2020-02-13	2020-02-24	Review		Yao, Tian-Tian; Qian, Jian-Dan; Zhu, Wen-Yan; Wang, Yan; Wang, Gui-Qiang	Journal of Medical Virology
Evolutionary history, potential intermediate animal host, and cross-species analyses of SARS-CoV-2	10.1002/jmv.25731	2020-02-27	2020-02-21	2020-02-15	2020-02-24	Research		Li, Xingguang; Zai, Junjie; Zhao, Qiang; Nie, Qing; Li, Yi; Foley, Brian T.; Chaillon, Antoine	Journal of Medical Virology
The indispensable role of emergency medicine in national preparedness for high consequence infectious diseases (HCIDs)	10.1002/emp2.12041	2020-02-27		2020-02-17	2020-02-17	Commentary		Sánchez, Sarimer M.; Shenoy, Erica S.; Biddinger, Paul D.	Journal of the American College of Emergency Physicians Open
Pulmonary pathology of early phase 2019 novel coronavirus (COVID-19) pneumonia in two patients with lung cancer	10.1016/j.jtho.2020.02.010	2020-02-27	2020-02-11	2020-02-18	2020-02-20	Case Study		Tian, Sufang; Hu, Weidong; Niu, Li; Liu, Huan; Xu, Haibo; Xiao, Shu-Yuan	Journal of Thoracic Oncology
Nepal’s First Case of COVID-19 and public health response	10.1093/jtm/taaa024	2020-02-27	2020-02-20			Case Study		Shrestha, Ranish; Shrestha, Sunil; Khanal, Pratik; Bhuvan, K. C.	Journal of Travel Medicine
Daily briefing: When a tiny lab accident almost leads to amputation	10.1038/d41586-020-00581-9	2020-02-27				News Item		Graham, Flora	Nature
Convalescent plasma as a potential therapy for COVID-19	10.1016/S1473-3099(20)30141-9	2020-02-27	2020-02-22			Commentary		Chen, Long; Xiong, Jing; Bao, Lei; Shi, Yuan	The Lancet Infectious Diseases
Where did SARS-CoV-2 come from?	10.1136/vr.m740	2020-02-27	2020-02-22			Commentary		Zhai, S. L.; Wei, W. K.; Lv, D. H.; Xu, Z. H.; Chen, Q. L.; Sun, M. F.; Li, F.; Wang, D.	The Veterinary record
Clinical characteristics of laboratory confirmed positive cases of SARS-CoV-2 infection in Wuhan, China: A retrospective single center analysis	10.1016/j.tmaid.2020.101606	2020-02-27	2020-02-01	2020-02-17	2020-02-24	Case Study		Huang, Yihui; Tu, Mengqi; Wang, Shipei; Chen, Sichao; Zhou, Wei; Chen, Danyang; Zhou, Lin; Wang, Min; Zhao, Yan; Zeng, Wen; Huang, Qi; Xu, Hai'bo; Liu, Zeming; Guo, Liang	Travel Medicine and Infectious Disease
COVID-19: Zoonotic aspects	10.1016/j.tmaid.2020.101607	2020-02-27		2020-02-13	2020-02-24	Correspondence		Ahmad, Tauseef; Khan, Muhammad; Haroon; Musa, Taha Hussein; Nasir, Saima; Hui, Jin; Bonilla-Aldana, D. Katterine; Rodriguez-Morales, Alfonso J.	Travel Medicine and Infectious Disease
Asymptomatic coronavirus infection: MERS-CoV and SARS-CoV-2 (COVID-19)	10.1016/j.tmaid.2020.101608	2020-02-27		2020-02-12	2020-02-24	Correspondence		Al-Tawfiq, Jaffar A.	Travel Medicine and Infectious Disease
Singapore claims first use of antibody test to track coronavirus infections Journal	10.1126/science.abb4942	2020-02-27	2020-02-26			News Item		Dennis Normile	Sccience
Responding to Covid-19 — A Once-in-a-Century Pandemic?	10.1056/NEJMp2003762	2020-02-28				Perspective		Gates, Bill	New England Journal of Medicine
Clinical Characteristics of Coronavirus Disease 2019 in China	10.1056/NEJMoa2002032	2020-02-28	2020-01-29			Case Study	as of February 25	Guan, Wei-jie; Ni, Zheng-yi; Hu, Yu; Liang, Wen-hua; Ou, Chun-quan; He, Jian-xing; Liu, Lei; Shan, Hong; Lei, Chun-liang; Hui, David S. C.; Du, Bin; Li, Lan-juan; Zeng, Guang; Yuen, Kwok-Yung; Chen, Ru-chong; Tang, Chun-li; Wang, Tao; Chen, Ping-yan; Xiang, Jie; Li, Shi-yue; Wang, Jin-lin; Liang, Zi-jing; Peng, Yi-xiang; Wei, Li; Liu, Yong; Hu, Ya-hua; Peng, Peng; Wang, Jian-ming; Liu, Ji-yang; C…	New England Journal of Medicine
Anesthetic Management of Patients with Suspected 2019 Novel Coronavirus Infection During Emergency Procedures	10.1053/j.jvca.2020.02.039	2020-02-28	2020-01-31			Case Study		Zhao, Shuai; Ling, Ken; Yan, Hong; Zhong, Liang; Peng, Xiaohong; Yao, Shanglong; Huang, Jiapeng; Chen, Xiangdong	Journal of Cardiothoracic and Vascular Anesthesia
Rapid random access detection of the novel SARS-coronavirus-2 (SARS-CoV-2, previously 2019-nCoV) using an open access protocol for the Panther Fusion	10.1016/j.jcv.2020.104305	2020-02-28		2020-02-04		Research		Cordes, Anne K.; Heim, Albert	Journal of Clinical Virology
Management strategies of neonatal jaundice during the coronavirus disease 2019 outbreak	10.1007/s12519-020-00347-3	2020-02-28		2020-02-16	2020-02-18	Review		Ma, X. L.; Chen, Z.; Zhu, J. J.; Shen, X. X.; Wu, M. Y.; Shi, L. P.; Du, L. Z.; Fu, J. F.; Shu, Q.	World journal of pediatrics : WJP
Healthcare information for all	10.1136/bmj.m759	2020-02-28				Editorial		Pakenham-Walsh, Neil; Godlee, Fiona	BMJ
Healthcare information for all	10.1136/bmj.m818	2020-02-28				Correction		Pakenham-Walsh, Neil; Godlee, Fiona	BMJ
Covid-19: preparedness, decentralisation, and the hunt for patient zero	10.1136/bmj.m799	2020-02-28	2020-02-24			Editorial		Carinci, F.	BMJournal (Clinical research ed.)
Covid-19: school closures and bans on mass gatherings will need to be considered, says England's CMO	10.1136/bmj.m806	2020-02-28	2020-02-27			News Item		Moberly, T.	BMJournal (Clinical research ed.)
Preventing a covid-19 pandemic	10.1136/bmj.m810	2020-02-28	2020-02-26			Editorial		Watkins, J.	BMJournal (Clinical research ed.)
Subunit Vaccines Against Emerging Pathogenic Human Coronaviruses	10.3389/fmicb.2020.00298	2020-02-28		2019-11-28	2020-02-10	Review		Du, Ning Wang; Jian, Shang; Shibo, Jiang; Lanying	Frontiers in Microbiology
A case of 2019 Novel Coronavirus in a pregnant woman with preterm delivery	10.1093/cid/ciaa200	2020-02-28		2020-02-12		Case Study		Wang, Xiaotong; Zhou, Zhiqiang; Zhang, Jianping; Zhu, Fengfeng; Tang, Yongyan; Shen, Xinghua	Clinical Infectious Diseases
Radiology Perspective of Coronavirus Disease 2019 (COVID-19): Lessons From Severe Acute Respiratory Syndrome and Middle East Respiratory Syndrome	10.2214/ajr.20.22969	2020-02-28	2020-02-24			Perspective		Hosseiny, M.; Kooraki, S.; Gholamrezanezhad, A.; Reddy, S.; Myers, L.	AJR. American journal of roentgenology
Q&A: The novel coronavirus outbreak causing COVID-19	10.1186/s12916-020-01533-w	2020-02-28		2020-02-17	2020-02-17	Commentary		['Fisher, Dale', 'Heymann, David']	BMC Med
Imaging and clinical features of patients with 2019 novel coronavirus SARS-CoV-2	10.1007/s00259-020-04735-9	2020-02-28	2020-02-10	2020-02-10	2020-02-19	Case Study		Xu, Xi; Yu, Chengcheng; Qu, Jing; Zhang, Lieguang; Jiang, Songfeng; Huang, Deyang; Chen, Bihua; Zhang, Zhiping; Guan, Wanhua; Ling, Zhoukun; Jiang, Rui; Hu, Tianli; Ding, Yan; Lin, Lin; Gan, Qingxin; Luo, Liangping; Tang, Xiaoping; Liu, Jinxin	European Journal of Nuclear Medicine and Molecular Imaging
The psychiatric impact of the novel coronavirus outbreak	10.1016/j.psychres.2020.112902	2020-02-28		2020-02-11	2020-02-27	Commentary		Carvalho, Poliana Moreira de Medeiros; Moreira, Marcial Moreno; de Oliveira, Matheus Nogueira Arcanjo; Landim, José Marcondes Macedo; Neto, Modesto Leite Rolim	Psychiatry Research
Psychological crisis intervention during the outbreak period of new coronavirus pneumonia from experience in Shanghai	10.1016/j.psychres.2020.112903	2020-02-28	2020-02-21	2020-02-25	2020-02-27	Recommendation		Jiang, Xixi; Deng, Lili; Zhu, Yuncheng; Ji, Haifeng; Tao, Lily; Liu, Li; Yang, Daoliang; Ji, Weidong	Psychiatry Research
Is the Africa prepared for tackling the COVID-19 (SARS-CoV-2) epidemic? - lessons from past outbreaks, ongoing pan-African public health efforts, and implications for the future	10.1016/j.ijid.2020.02.049	2020-02-28	2020-02-22	2020-02-19		Editorial		Kapata, Nathan; Ihekweazu, Chikwe; Ntoumi, Francine; Tajudeen, Raji; Chanda-Kapata, Pascalina; Mwaba, Peter; Mukonka, Victor; Bates, Matthew; Tembo, John; Corman, Victor; Mfinanga, Sayoki; Asogun, Danny; Elton, Linzy; Arruda, Lia Bárbara; Thomason, Margaret J.; Mboera, Leonard; Yavlinsky, Alexei; Haider, Najmul; Simons, David; Hollmann, Lara; Lule, Swaib A.; Veas, Francisco; Abdel Hamid, Muzamil …	International Journal of Infectious Diseases
Genome Detective Coronavirus Typing Tool for rapid identification and characterization of novel coronavirus genomes	10.1093/bioinformatics/btaa145	2020-02-28		2020-01-31	2020-02-21	Research		Cleemput, S.; Dumon, W.; Fonseca, V.; Karim, W. A.; Giovanetti, M.; Alcantara, L. C.; Deforche, K.; de Oliveira, T.	Bioinformatics (Oxford, England)
Voice from China: nomenclature of the novel coronavirus and related diseases	10.1097/CM9.0000000000000787	2020-02-28	2020-02-23			Commentary			Chin Med Journal (Engl)
Effectiveness for the Response to COVID-19: The MERS Outbreak Containment Procedures	10.24171/j.phrp.2020.11.1.01	2020-02-28	2020-02-17			Editorial		Cho, Hae-Wol	Osong Public Health and Research Perspectives
Identification of Coronavirus Isolated from a Patient in Korea with COVID-19	10.24171/j.phrp.2020.11.1.02	2020-02-28	2020-02-11	2020-02-13	2020-02-19	Case Study		['Kim, Jeong-Min', 'Chung, Yoon-Seok', 'Jo, Hye Jun', 'Lee, Nam-Joo', 'Kim, Mi Seon', 'Woo, Sang Hee', 'Park, Sehee', 'Kim, Jee Woong', 'Kim, Heui Man', 'Han, Myung-Guk']	Osong Public Health and Research Perspectives
Early Epidemiological and Clinical Characteristics of 28 Cases of Coronavirus Disease in South Korea	10.24171/j.phrp.2020.11.1.03	2020-02-28	2020-02-14	2020-02-16	2020-02-21	Case Study		COVID-19 National Emergency Response Center, Epidemiology and Case Management Team, Korea Centers for Disease Control and Prevention	Osong Public Health and Research Perspectives
Contact Transmission of COVID-19 in South Korea: Novel Investigation Techniques for Tracing Contacts	10.24171/j.phrp.2020.11.1.09	2020-02-28	2020-02-14	2020-02-13	2020-02-18	Recommendation		Korea Centers for Disease Control and Prevention, Cheongju, Korea	Osong Public Health and Research Perspectives
A Well Infant with Coronavirus Disease 2019 (COVID-19) with High Viral Load	10.1093/cid/ciaa201	2020-02-28	2020-02-11	2020-02-15	2020-02-25	Case Study		Kam, Kai-qian; Yung, Chee Fu; Cui, Lin; Lin Tzer Pin, Raymond; Mak, Tze Minn; Maiwald, Matthias; Li, Jiahui; Chong, Chia Yin; Nadua, Karen; Tan, Natalie Woon Hui; Thoon, Koh Cheng	Clinical Infectious Diseases
A Case Series of children with 2019 novel coronavirus infection: clinical and epidemiological features	10.1093/cid/ciaa198	2020-02-28	2020-02-19	2020-02-07		Case Study		Cai, J.; Xu, J.; Lin, D.; Yang, Z.; Xu, L.; Qu, Z.; Zhang, Y.; Zhang, H.; Jia, R.; Liu, P.; Wang, X.; Ge, Y.; Xia, A.; Tian, H.; Chang, H.; Wang, C.; Li, J.; Wang, J.; Zeng, M.	Clinical infectious diseases : an official publication of the Infectious Diseases Society of America
The response of Milan's Emergency Medical System to the COVID-19 outbreak in Italy	10.1016/S0140-6736(20)30493-1	2020-02-28	2020-02-21			Correspondence		Spina, Stefano; Marrazzo, Francesco; Migliari, Maurizio; Stucchi, Riccardo; Sforza, Alessandra; Fumagalli, Roberto	The Lancet
COVID-19—New Insights on a Rapidly Changing Epidemic	10.1001/jama.2020.3072	2020-02-28				Commentary		del Rio, Carlos; Malani, Preeti N.	JAMA
Novel coronavirus disease (Covid-19): the first two patients in the UK with person to person transmission	10.1016/j.jinf.2020.02.020	2020-02-28	2020-02-21		2020-02-25	Case Study		Lillie, Patrick J.; Samson, Anda; Li, Ang; Adams, Kate; Capstick, Richard; Barlow, Gavin D.; Easom, Nicholas; Hamilton, Eve; Moss, Peter J.; Evans, Adam; Ivan, Monica; Team, P. H. E. Incident; Taha, Yusri; Duncan, Christopher J. A.; Schmid, Matthias L.	Journal of Infection
Clinical trial analysis of 2019-nCoV therapy registered in China	10.1002/jmv.25733	2020-02-28	2020-02-14	2020-02-20	2020-02-26	Commentary		Zhang, Qi; Wang, Yakun; Qi, Changsong; Shen, Lin; Li, Jian	Journal of Medical Virology
Clinical characteristics of 50466 hospitalized patients with 2019-nCoV infection	10.1002/jmv.25735	2020-02-28	2020-02-24	2020-02-24	2020-02-26	Research		Sun, Pengfei; Qie, Shuyan; Liu, Zongjan; Ren, Jizhen; Li, Kun; Xi, Jianing	Journal of Medical Virology
Development of epitope-based peptide vaccine against novel Coronavirus 2019 (SARS-COV-2): Immunoinformatics approach	10.1002/jmv.25736	2020-02-28	2020-02-24	2020-02-22	2020-02-26	Research		Bhattacharya, Manojit; Ranjan Sharma, Ashish; Patra, Prasanta; Ghosh, Pratik; Sharma, Garima; Chandra Patra, Bidhan; Lee, Sang-Soo; Chakraborty, Chiranjib	Journal of Medical Virology
Saudi Arabia`s measures to curb the COVID-19 outbreak: temporary suspension of the Umrah pilgrimage	10.1093/jtm/taaa029	2020-02-28	2020-02-27			Commentary		Ebrahim, S. H.; Memish, Z. A.	Journal of travel medicine
COVID-19 outbreak on the Diamond Princess cruise ship: estimating the epidemic potential and effectiveness of public health countermeasures	10.1093/jtm/taaa030	2020-02-28				Research		Rocklöv, J.; Sjödin, H.; Wilder-Smith, A.	Journal of Travel Medicine
Anti-HCV, nucleotide inhibitors, repurposing against COVID-19	10.1016/j.lfs.2020.117477	2020-02-28	2020-01-20	2020-01-27	2020-02-26	Research		Elfiky, Abdo A.	Life Sciences
Guide to Understanding the 2019 Novel Coronavirus	10.1016/j.mayocp.2020.02.003	2020-02-28	2020-02-09			Review		Shah, Aditya; Kashyap, Rahul; Tosh, Pritish; Sampathkumar, Priya; O’Horo, John C.	Mayo Clinic Proceedings
Feasibility of controlling COVID-19 outbreaks by isolation of cases and contacts	10.1016/S2214-109X(20)30074-7	2020-02-28	2020-02-05			Research		Hellewell, Joel; Abbott, Sam; Gimma, Amy; Bosse, Nikos I.; Jarvis, Christopher I.; Russell, Timothy W.; Munday, James D.; Kucharski, Adam J.; Edmunds, W. John; Sun, Fiona; Flasche, Stefan; Quilty, Billy J.; Davies, Nicholas; Liu, Yang; Clifford, Samuel; Klepac, Petra; Jit, Mark; Diamond, Charlie; Gibbs, Hamish; van Zandvoort, Kevin; Funk, Sebastian; Eggo, Rosalind M.	The Lancet Global Health
A family cluster of SARS-CoV-2 infection involving 11 patients in Nanjing, China	10.1016/S1473-3099(20)30147-X	2020-02-28	2020-01-30			Case Study		Huang, Rui; Xia, Juan; Chen, Yuxin; Shan, Chun; Wu, Chao	The Lancet Infectious Diseases
How African migrants in China cope with barriers to health care	10.1016/S2468-2667(20)30048-7	2020-02-28				Correspondance		Bodomo, Adams; Liem, Andrian; Lin, Lavinia; Hall, Brian J.	The Lancet Public Health
Strategies shift as coronavirus pandemic looms	10.1126/science.367.6481.962	2020-02-28				Commentary		Cohen, Jon; Kupferschmidt, Kai	Science
Preprints bring ‘firehose’ of outbreak data	10.1126/science.367.6481.963	2020-02-28				Commentary		Kupferschmidt, Kai	Science
The costs of secrecy	10.1126/science.abb4420	2020-02-28				Editorial		Thorp, H. Holden	Science
The United States badly bungled coronavirus testing—but things may soon improve	10.1126/science.abb5152	2020-02-28				News Item		Cohen, Jon	Science
Backcalculating the Incidence of Infection with COVID-19 on the Diamond Princess	10.3390/jcm9030657	2020-02-29	2020-02-24	2020-02-25	2020-02-25	Editorial		Nishiura, Hiroshi	Journal Clin Med
Clinical trials for the treatment of Coronavirus disease 2019 (COVID-19): A rapid response to urgent need	10.1007/s11427-020-1660-2	2020-02-29	2020-02-18	2020-02-23	2020-02-28	Commentary		He, Yudi; Xu, Wenshuai; Ma, Aiping; Yang, Yanli; Xu, Kai-Feng	Science China Life Sciences
Clinical Characteristics of Imported Cases of COVID-19 in Jiangsu Province: A Multicenter Descriptive Study	10.1093/cid/ciaa199	2020-02-29	2020-02-14	2020-02-08		Case Study		Wu, J.; Liu, J.; Zhao, X.; Liu, C.; Wang, W.; Wang, D.; Xu, W.; Zhang, C.; Yu, J.; Jiang, B.; Cao, H.; Li, L.	Clinical infectious diseases : an official publication of the Infectious Diseases Society of America
Discovering drugs to treat coronavirus disease 2019 (COVID-19)	10.5582/ddt.2020.01012	2020-02-29	2020-02-21	2020-02-23	2020-02-28	Commentary		Dong, Liying; Hu, Shasha; Gao, Jianjun	Drug Discoveries & Therapeutics
Transmission potential of the novel coronavirus (COVID-19) onboard the Diamond Princess Cruises Ship, 2020	10.1016/j.idm.2020.02.003	2020-02-29	2020-02-22	2020-02-25	2020-02-27	Research		Mizumoto, Kenji; Chowell, Gerardo	Infectious Disease Modelling
The Clinical and Chest CT Features Associated with Severe and Critical COVID-19 Pneumonia	10.1097/RLI.0000000000000672	2020-02-29				Case Study		Li, Kunhua; Wu, Jiong; Wu, Faqi; Guo, Dajing; Chen, Linli; Fang, Zheng; Li, Chuanming	Invest Radiol
Indian pharma threatened by COVID-19 shutdowns in China	10.1016/S0140-6736(20)30459-1	2020-02-29				Report		Chatterjee, Patralekha	The Lancet
How to fight an infodemic	10.1016/S0140-6736(20)30461-X	2020-02-29				Report		Zarocostas, John	The Lancet
First imported case of 2019 novel coronavirus in Canada, presenting as mild pneumonia	10.1016/S0140-6736(20)30423-2	2020-02-29				Correction		Silverstein, William Kyle; Stroud, Lynfa; Cleghorn, Graham Edward; Leis, Jerome Allen	The Lancet
Air Medical Evacuation of Nepalese Citizen During Epidemic of COVID-19 from Wuhan to Nepal	10.31729/jnma.4857	2020-02-29				Commentary		Thapa, Bibek Rajbhandari; Naveen, Phuyal; Bikal, Shrestha; Moon	Journal of Nepal Medical Association
COVID-19 in Latin America: The implications of the first confirmed case in Brazil	10.1016/j.tmaid.2020.101613	2020-02-29	2020-02-27	2020-02-27	2020-02-28	Commentary		Rodriguez-Morales, Alfonso J.; Gallego, Viviana; Escalera-Antezana, Juan Pablo; Mendez, Claudio A.; Zambrano, Lysien I.; Franco-Paredes, Carlos; Suárez, Jose A.; Rodriguez-Enciso, Hernan D.; Balbin-Ramon, Graciela Josefina; Savio-Larriera, Eduardo; Risquez, Alejandro; Cimerman, Sergio	Travel Med Infect Dis
In bid to rapidly expand coronavirus testing, U.S. agency abruptly changes rules	:10.1126/science.abb5231	2020-02-29				News Item		Cohen, Jon	Science
Effects and challenges of Open Science - Academic movements related to the Novel coronavirus (2019-nCoV) and COVID-19	10.18919/jkg.70.3_140	2020-03-01			2020-02-07	Commentary		Ui IKEUCHI	The Journal of Information Science and Technology Association
A potential role for integrins in host cell entry by SARS-CoV-2	10.1016/j.antiviral.2020.104759	2020-03-01		2020-02-20	2020-02-28	Commentary		Sigrist, Christian; Bridge, Alan; Le Mercier, Philippe	Antiviral Research
Coronavirus disinfection in histopathology	10.1080/01478885.2020.1734718	2020-03-01				Recommendation		Henwood, Anthony F.	Journal of Histotechnology
The Wuhan SARS-CoV-2 – What's Next for China	10.1002/jmv.25738	2020-03-01		2020-02-13	2020-02-26	Commentary		Lu, Hongzhou; Stratton, Charles W.; Tang, Yi-Wei	Journal of Medical Virology
Coronavirus disease (COVID-19) and neonate: What neonatologist need to know	10.1002/jmv.25740	2020-03-01	2020-02-07	2020-02-16	2020-02-26	Review		Lu, Qi; Shi, Yuan	Journal of Medical Virology
Coronavirus just caused the American Physical Society to cancel its biggest meeting of the year	10.1126/science.abb5282	2020-03-01				News Item		Cho, Adrian	Science
Hospital Emergency Management Plan During the COVID-19 Epidemic	10.1111/acem.13951	2020-03-02				Research		Cao, Yubin; Li, Qin; Chen, Jing; Guo, Xia; Miao, Cheng; Yang, Hui; Chen, Zihang; Li, Chunjie	Academic Emergency Medicine
The species Severe acute respiratory syndrome-related coronavirus: classifying 2019-nCoV and naming it SARS-CoV-2	10.1038/s41564-020-0695-z	2020-03-02		2020-02-05	2020-02-19	Research		Gorbalenya, Alexander E.; Baker, Susan C.; Baric, Ralph S.; de Groot, Raoul J.; Drosten, Christian; Gulyaeva, Anastasia A.; Haagmans, Bart L.; Lauber, Chris; Leontovich, Andrey M.; Neuman, Benjamin W.; Penzar, Dmitry; Perlman, Stanley; Poon, Leo L. M.; Samborskiy, Dmitry V.; Sidorov, Igor A.; Sola, Isabel; Ziebuhr, John; Coronaviridae Study Group of the International Committee on Taxonomy of, Vir…	Nature Microbiology
The novel coronavirus (SARS-CoV-2) infections in China: prevention, control and challenges	10.1007/s00134-020-05977-9	2020-03-02	2020-02-15		2020-02-19	Correspondance		Zhang, Sheng; Diao, Meng Yuan; Duan, Liwei; Lin, Zhaofen; Chen, Dechang	Intensive Care Medicine
Clinical features and short-term outcomes of 18 patients with corona virus disease 2019 in intensive care unit	10.1007/s00134-020-05987-7	2020-03-02			2020-02-21	Case Study		Cao, Jianlei; Hu, Xiaoyong; Cheng, Wenlin; Yu, Lei; Tu, Wen-Jun; Liu, Qiang	Intensive Care Medicine
Imaging changes of severe COVID-19 pneumonia in advanced stage	10.1007/s00134-020-05990-y	2020-03-02		2020-02-21	2020-02-23	Case Study		Zhang, Wei	Intensive Care Medicine
Optimization Method for Forecasting Confirmed Cases of COVID-19 in China	10.3390/jcm9030674	2020-03-02	2020-02-08	2020-02-09	2020-02-27	Research		Al-qaness, A. A. Mohammed; Ewees , A. Ahmed; Fan, Hong; Abd El Aziz , Mohamed; McAleer, Michael	Journal of Clinical Medicine
Covid-19: a digital epidemic	10.1136/bmj.m764	2020-03-02				Commentary		Chiolero, Arnaud	BMJ
Covid-19: retired doctors could be asked to return to work, says Hancock	10.1136/bmj.m831	2020-03-02	2020-03-02			News Item		Mahase, Elisabeth	BMJ
Covid-19: US health department staff sent to meet citizens returning from China weren't protected, claims whistleblower	10.1136/bmj.m833	2020-03-02	2020-02-25			News Item		Dyer, Owen	BMJ
First two months of the 2019 Coronavirus Disease (COVID-19) epidemic in China: real-time surveillance and evaluation with a second derivative model	10.1186/s41256-020-00137-4	2020-03-02	2020-02-23	2020-02-13	2020-02-20	Research		Chen, Xinguang; Yu, Bin	Global Health Research and Policy
The novel coronavirus outbreak in Wuhan, China	10.1186/s41256-020-00135-6	2020-03-02	2020-02-19	2020-02-07	2020-02-19	Commentary		Zhu, Hengbo; Wei, Li; Niu, Ping	Global Health Research and Policy
COVID-19 in 2 Persons with Mild Upper Respiratory Tract Symptoms on a Cruise Ship, Japan	10.3201/eid2606.200452	2020-03-02	2020-02-27			Case Study	As of 28.Feb.	Arashiro, Takeshi; Furukawa, Keiichi; Nakamura, Akira	Emerging infectious diseases
Imported Novel Coronavirus Infections: Observation on Active and Passive Case Detection in Thailand	10.1089/pop.2020.0014	2020-03-02				Case Study		Sookaromdee, Pathum; Wiwaniveitkit, Viroj	Population Health Management
Critical care crisis and some recommendations during the COVID-19 epidemic in China	10.1007/s00134-020-05979-7	2020-03-02		2020-02-17	2020-02-19	Recommendation		Xie, Jianfeng; Tong, Zhaohui; Guan, Xiangdong; Du, Bin; Qiu, Haibo; Slutsky, Arthur S.	Intensive Care Medicine volume
SARS-CoV-2 infection in children: Transmission dynamics and clinical characteristics	10.1016/j.jfma.2020.02.009	2020-03-02	2020-02-26	2020-02-25	2020-02-26	Perspective		Cao, Qing; Chen, Yi-Ching; Chen, Chyi-Liang; Chiu, Cheng-Hsun	Journal of the Formosan Medical Association
Responding to health emergencies in the Eastern Mediterranean region in times of conflict	10.1016/S0140-6736(20)30069-6	2020-03-02	2020-02-28			Commentary		Brennan, Richard; Hajjeh, Rana; Al-Mandhari, Ahmed	The Lancet
China’s aggressive measures have slowed the coronavirus. They may not work in other countries	10.1126/science.abb5426	2020-03-02				News Item		Cohen, Kai Kupferschmidt; Jon	Science
Clinical predictors of mortality due to COVID-19 based on an analysis of data of 150 patients from Wuhan, China	10.1007/s00134-020-05991-x	2020-03-03			2020-02-24	Case study		Ruan, Qiurong; Yang, Kun; Wang, Wenxia; Jiang, Lingyu; Song, Jianxin	Intensive Care Med
Community Transmission of Severe Acute Respiratory Syndrome Coronavirus 2, Shenzhen, China, 2020	10.3201/eid2606.200239	2020-03-03	2020-02-05			Case study		Liu, Jiaye; Liao, Xuejiao; Qian, Shen; Yuan, Jing; Wang, Fuxiang; Liu, Yingxia; Wang, Zhaoqin; Wang, Fu-Sheng; Liu, Lei; Zhang, Zheng	Emerg Infect Dis
Epidemiologic Features and Clinical Course of Patients Infected With SARS-CoV-2 in Singapore	10.1001/jama.2020.3204	2020-03-03	2020-02-25		2020-02-27	Case study		Young, Barnaby Edward; Ong, Sean Wei Xiang; Kalimuddin, Shirin; Low, Jenny G.; Tan, Seow Yen; Loh, Jiashen; Ng, Oon-Tek; Marimuthu, Kalisvar; Ang, Li Wei; Mak, Tze Minn; Lau, Sok Kiang; Anderson, Danielle E.; Chan, Kian Sing; Tan, Thean Yen; Ng, Tong Yong; Cui, Lin; Said, Zubaidah; Kurupatham, Lalitha; Chen, Mark I. Cheng; Chan, Monica; Vasoo, Shawn; Wang, Lin-Fa; Tan, Boon Huan; Lin, Raymond Tze…	JAMA
Angiotensin-converting enzyme 2 (ACE2) as a SARS-CoV-2 receptor: molecular mechanisms and potential therapeutic target	10.1007/s00134-020-05985-9	2020-03-03	2020-02-27	2020-02-17	2020-02-20	Commentary		Zhang, Haibo; Penninger, Josef M.; Li, Yimin; Zhong, Nanshan; Slutsky, Arthur S.	Intensive Care Med
Imaging changes in severe COVID-19 pneumonia	10.1007/s00134-020-05976-w	2020-03-03		2020-02-15	2020-02-17	Case Study		Zhang, Wei	Intensive Care Med
Fecal specimen diagnosis 2019 Novel Coronavirus-Infected Pneumonia	10.1002/jmv.25742	2020-03-03	2020-01-27	2020-02-16	2020-03-01	Research		Zhang, JingCheng; Wang, SaiBin; Xue, YaDong	Journal of Medical Virology
Analyzing the Epidemiological Outbreak of COVID-19: A Visual Exploratory Data Analysis (EDA) Approach	10.1002/jmv.25743	2020-03-03	2020-02-24	2020-02-23	2020-03-01	Research		Dey, Samrat Kumar; Rahman, Md Mahbubur; Siddiqi, Umme Raihan; Howlader, Arpita	Journal of Medical Virology
Prevention Is Better Than the Cure: Risk Management of COVID-19	10.3390/jrfm13030046	2020-03-03	2020-02-26	2020-02-28	2020-02-28	Editorial		Michael McAleer	J. Risk Financial Manag.
Open peer-review platform for COVID-19 preprints	10.1038/d41586-020-00613-4	2020-03-03				Correspondance		Johansson, Michael A.; Saderi, Daniela	Nature
Sixty seconds on . . . beards	10.1136/bmj.m811	2020-03-03				News Item		Rimmer, Abi	BMJ
Covid-19: UK could delay non-urgent care and call doctors back from leave and retirement	10.1136/bmj.m854	2020-03-03	2020-03-03			News Item		Mahase, Elisabeth	BMJ
COVID-19: Gastrointestinal manifestations and potential fecal-oral transmission	10.1053/j.gastro.2020.02.054	2020-03-03	2020-02-20	2020-02-20	2020-02-26	Commentary		Gu, Jinyang; Han, Bing; Wang, Jian	Gastroenterology
Evidence for gastrointestinal infection of SARS-CoV-2	10.1053/j.gastro.2020.02.055	2020-03-03	2020-02-12	2020-02-25	2020-02-27	Case Study		Xiao, Fei; Tang, Meiwen; Zheng, Xiaobin; Liu, Ye; Li, Xiaofeng; Shan, Hong	Gastroenterology
Stepping up infection control measures in ophthalmology during the novel coronavirus outbreak: an experience from Hong Kong	10.1007/s00417-020-04641-8	2020-03-03	2020-02-27	2020-02-21	2020-02-26	Commentary		Lai, Tracy H. T.; Tang, Emily W. H.; Chau, Sandy K. Y.; Fung, Kitty S. C.; Li, Kenneth K. W.	Graefe's Archive for Clinical and Experimental Ophthalmology
Relation Between Chest CT Findings and Clinical Conditions of Coronavirus Disease (COVID-19) Pneumonia: A Multicenter Study	10.2214/AJR.20.22976	2020-03-03	2020-02-17			Case Study		Zhao, Wei; Zhong, Zheng; Xie, Xingzhi; Yu, Qizhi; Liu, Jun	AJR Am Journal Roentgenol
Coronavirus Disease 2019 (COVID-19): A critical care perspective beyond China	10.1016/j.accpm.2020.03.001	2020-03-03				Editorial		Rello, Jordi; Tejada, Sofia; Userovici, Caroline; Arvaniti, Kostoula; Pugin, Jérôme; Waterer, Grant	Anaesthesia Critical Care & Pain Medicine
The SARS-CoV-2 Vaccine Pipeline: an Overview	10.1007/s40475-020-00201-6	2020-03-03				Editorial		Chen, Wen-Hsiang; Strych, Ulrich; Hotez, Peter J.; Bottazzi, Maria Elena	Current Tropical Medicine Reports
COVID-19: a novel coronavirus and a novel challenge for critical care	10.1007/s00134-020-05955-1	2020-03-03	2020-03-01	2020-01-30	2020-01-31	News Item		Arabi, Yaseen M.; Murthy, Srinivas; Webb, Steve	Intensive Care Med
Transmission routes of 2019-nCoV and controls in dental practice	10.1038/s41368-020-0075-9	2020-03-03		2020-02-15	2020-02-19	Review		Peng, Xian; Xu, Xin; Li, Yuqing; Cheng, Lei; Zhou, Xuedong; Ren, Biao	International Journal of Oral Science
Understanding SARS-CoV-2-Mediated Inflammatory Responses: From Mechanisms to Potential Therapeutic Tools	10.1007/s12250-020-00207-4	2020-03-03		2020-02-14	2020-02-16	Review		Fu, Yajing; Cheng, Yuanxiong; Wu, Yuntao	Virol Sin
Helping the Radiologist: The Role of Scientific Journals to Help Prevent the Spread of COVID-19	10.1148/radiol.2020200661	2020-03-03				Commentary		Li, Xiaohu; Qian, Yinfeng; Liu, Bin; Yu, Yongqiang	Radiology
The inflection point about COVID-19 may have passed	10.1016/j.scib.2020.02.025	2020-03-03	2020-02-11			Commentary		Gu, Chaolin; Zhu, Jie; Sun, Yifei; Zhou, Kai; Gu, Jiang	Science Bulletin
Editorial 58(1)	10.1111/aje.12732	2020-03-03				Editorial		Abernethy, Katharine	African Journal of Ecology
Laboratory abnormalities in patients with COVID-2019 infection	10.1515/cclm-2020-0198	2020-03-03	2020-02-26			Review		Lippi, Giuseppe; Plebani, Mario	Clin Chem Lab Med
Public's early response to the novel coronavirus-infected pneumonia	10.1080/22221751.2020.1732232	2020-03-03		2020-02-10	2020-02-15	Research		Zhan, Siyi; Yang, Ying Ying; Fu, Chuanxi	Emerg Microbes Infect
The 2019-nCoV epidemic control strategies and future challenges of building healthy smart cities	10.1177/1420326X20910408	2020-03-03	2020-02-08			Editorial		Xu, Chunwen; Luo, Xilian; Yu, Chuck; Cao, Shi-Jie	Indoor and Built Environment
Novel Coronavirus and Hospital Infection Prevention: Preparing for the Impromptu Speech	10.1017/ice.2020.55	2020-03-03				Commentary		Bearman, Gonzalo; Pryor, Rachel; Albert, Heather; Brath, Lisa; Britton, Amy; Cooper, Kaila; Doll, Michelle; Godbout, Emily J.; Hemphill, Robin; Stevens, Michael P.	Infect Control Hosp Epidemiol
Identification of COVID-19 Can be Quicker through Artificial Intelligence framework using a Mobile Phone-Based Survey in the Populations when Cities/Towns Are Under Quarantine	10.1017/ice.2020.61	2020-03-03	2020-02-25			Commentary		Vazquez, Arni S.R. Srinivasa Rao; Jose A.	Infection Control & Hospital Epidemiology
Nonstructural proteins NS7b and NS8 are likely to be phylogenetically associated with evolution of 2019-nCoV	10.1016/j.meegid.2020.104272	2020-03-03	2020-02-08	2020-02-18	2020-03-03	Research		Fahmi, Muhamad; Kubota, Yukihiko; Ito, Masahiro	Infection, Genetics and Evolution
Potential Factors Influencing Repeated SARS Outbreaks in China	10.3390/ijerph17051633	2020-03-03		2020-01-28	2020-02-29	Review		Sun, Zhong; Thilakavathy, Karuppiah; Kumar, S. S.; He, Guozhong; Liu, V. Shi	International Journal of Environmental Research and Public Health
Clinical and High-Resolution CT Features of the COVID-19 Infection: Comparison of the Initial and Follow-up Changes	10.1097/rli.0000000000000674	2020-03-03	2020-02-12			Case Study		Xiong, Y.; Sun, D.; Liu, Y.; Fan, Y.; Zhao, L.; Li, X.; Zhu, W.	Investigative radiology
Solidarity with China as it holds the global front line during COVID-19 outbreak	10.1093/jtm/taaa027	2020-03-03	2020-02-24			Editorial		Lin, Leesa	J Travel Med
The pandemic of social media panic travels faster than the COVID-19 outbreak	10.1093/jtm/taaa031	2020-03-03		2020-02-27	2020-02-29	Editorial		Depoux, Anneliese; Martin, Sam; Karafillakis, Emilie; Bsd, Raman Preet; Wilder-Smith, Annelies; Larson, Heidi	J Travel Med
Response to COVID-19 in Taiwan: Big Data Analytics, New Technology, and Proactive Testing	10.1001/jama.2020.3151	2020-03-03	2020-02-24			Commentary		Wang, C. Jason; Ng, Chun Y.; Brook, Robert H.	JAMA
Priorities for the US Health Community Responding to COVID-19	10.1001/jama.2020.3413	2020-03-03				Commentary		Adalja, Amesh A.; Toner, Eric; Inglesby, Thomas V.	JAMA
The deadly coronaviruses: The 2003 SARS pandemic and the 2020 novel coronavirus epidemic in China	10.1016/j.jaut.2020.102434	2020-03-03	2020-02-19	2020-02-19	2020-02-22	Review		Yang, Yongshi; Peng, Fujun; Wang, Runsheng; Guan, Kai; Jiang, Taijiao; Xu, Guogang; Sun, Jinlyu; Chang, Christopher	Journal of Autoimmunity
Practical experiences and suggestions on the eagle-eyed observer, a novel promising role for controlling nosocomial infection of the COVID-19 outbreak	10.1016/j.jhin.2020.02.020	2020-03-03	2020-02-23	2020-02-19	2020-02-27	Commentary		Peng, Jianhui; Ren, Nina; Wang, Mingke; Zhang, Gangqing	Journal of Hospital Infection
Association between 2019-nCoV transmission and N95 respirator use	10.1016/j.jhin.2020.02.021	2020-03-03	2020-02-22	2020-02-22	2020-02-27	Case Study		Wang, Xinghuan; Pan, Zhenyu; Cheng, Zhenshun	Journal of Hospital Infection
Effective strategies to prevent coronavirus disease-2019 (COVID-19) outbreak in hospital	10.1016/j.jhin.2020.02.022	2020-03-03	2020-02-23	2020-02-24	2020-02-27	Report		Lee, Ing-Kit; Wang, Chih-Chi; Lin, Meng-Chih; Kung, Chia-Te; Lan, Kuo-Chung; Lee, Chien-Te	Journal of Hospital Infection
Clinical and CT imaging features of 2019 novel coronavirus disease (COVID-19)	10.1016/j.jinf.2020.02.022	2020-03-03			2020-02-26	Case Study		Zhu, Ying; Liu, Yang-Li; Li, Zi-Ping; Kuang, Jian-Yi; Li, Xiang-Min; Yang, You-You; Feng, Shi-Ting	Journal of Infection
Corona Virus Disease 2019, a growing threat to children?	10.1016/j.jinf.2020.02.024	2020-03-03	2020-02-17		2020-02-26	Correspondance		Yang, Pu; Liu, Pin; Li, Dan; Zhao, Dongchi	Journal of Infection
On the origin and continuing evolution of SARS-CoV-2	10.1093/nsr/nwaa036	2020-03-03	2020-02-28	2020-02-25	2020-02-29	Research		Tang, Xiaolu; Wu, Changcheng; Li, Xiang; Song, Yuhe; Yao, Xinmin; Wu, Xinkai; Duan, Yuange; Zhang, Hong; Wang, Yirong; Qian, Zhaohui; Cui, Jie; Lu, Jian	National Science Review
Coronavirus response: a focus on containment is still apt	10.1038/d41586-020-00623-2	2020-03-03				Editorial			Nature
Novel coronavirus (2019-nCoV): Update on 3rd Coronavirus Outbreak of 21st Century	10.1093/qjmed/hcaa081	2020-03-03	2020-01-22	2020-02-22	2020-02-24	Commentary		Sahu, Kamal Kant; Mishra, Ajay Kumar; Lal, Amos	QJM
Guidelines for pregnant women with suspected SARS-CoV-2 infection	10.1016/S1473-3099(20)30157-2	2020-03-03				Commentary		Favre, Guillaume; Pomar, Léo; Qi, Xiaolong; Nielsen-Saines, Karin; Musso, Didier; Baud, David	The Lancet Infectious Diseases
Indonesia finally reports two coronavirus cases. Scientists worry it has many more	10.1126/science.abb5653	2020-03-03				News Item		Rochmyaningsih, Dyna	Science
Chloroquine and hydroxychloroquine as available weapons to fight COVID-19	10.1016/j.ijantimicag.2020.105932	2020-03-04		2020-02-26	2020-02-27	Commentary		Colson, Philippe; Rolain, Jean-Marc; Lagier, Jean-Christophe; Brouqui, Philippe; Raoult, Didier	International Journal of Antimicrobial Agents
Proposal for prevention and control of the 2019 novel coronavirus disease in newborn infants	10.1136/archdischild-2020-318996	2020-03-04			2020-02-20	Commentary		Li, F.; Feng, Z. C.; Shi, Y.	Archives of disease in childhood. Fetal and neonatal edition
Improved molecular diagnosis of COVID-19 by the novel, highly sensitive and specific COVID-19-RdRp/Hel real-time reverse transcription-polymerase chain reaction assay validated in vitro and with clinical specimens	10.1128/jcm.00310-20	2020-03-04				Research		Chan, Jasper Fuk-Woo; Yip, Cyril Chik-Yan; To, Kelvin Kai-Wang; Tang, Tommy Hing-Cheung; Wong, Sally Cheuk-Ying; Leung, Kit-Hang; Fung, Agnes Yim-Fong; Ng, Anthony Chin-Ki; Zou, Zijiao; Tsoi, Hoi-Wah; Choi, Garnet Kwan-Yue; Tam, Anthony Raymond; Cheng, Vincent Chi-Chung; Chan, Kwok-Hung; Tsang, Owen Tak-Yin; Yuen, Kwok-Yung	Journal of clinical microbiology
From the frontlines of COVID-19 – How prepared are we as obstetricians: a commentary	10.1111/1471-0528.16192	2020-03-04			2020-03-02	Commentary		Chua, Monica Shi Qi; Lee, Jill Cheng Sim; Sulaiman, Suzanna; Tan, Hak Koon	BJOG: An International Journal of Obstetrics & Gynaecology
Covid-19: hoarding and misuse of protective gear is jeopardising the response, WHO warns	10.1136/bmj.m869	2020-03-04	2020-03-03			News Item		Mahase, Elisabeth	BMJ
Procalcitonin in patients with severe coronavirus disease 2019 (COVID-19): a meta-analysis	10.1016/j.cca.2020.03.004	2020-03-04	2020-03-03	2020-03-03	2020-03-03	Research		Lippi, Giuseppe; Plebani, Mario	Clinica Chimica Acta
A glimpse into the origins of genetic diversity in SARS-CoV-2	10.1093/cid/ciaa213	2020-03-04		2020-02-25		Editorial		Wertheim, Joel O.	Clinical Infectious Diseases
Déja Vu or Jamais Vu? How the Severe Acute Respiratory Syndrome Experience Influenced a Singapore Radiology Department's Response to the Coronavirus Disease (COVID-19) Epidemic	10.2214/AJR.20.22927	2020-03-04				Recommendation		Cheng, Lionel Tim-Ee; Chan, Lai Peng; Tan, Ban Hock; Chen, Robert Chun; Tay, Kiang Hiong; Ling, Moi Lin; Tan, Bien Soo	AJR Am Journal Roentgenol
Coronavirus Disease 2019 (COVID-19): Role of Chest CT in Diagnosis and Management	10.2214/AJR.20.22954	2020-03-04	2020-02-09			Case Study		Li, Yan; Xia, Liming	AJR Am Journal Roentgenol
Iranian mental health during the COVID-19 epidemic	10.1016/j.ajp.2020.101990	2020-03-04		2020-02-27		Commentary		Zandifar, Atefeh; Badrfam, Rahim	Asian Journal of Psychiatry
Novel antibody epitopes dominate the antigenicity of spike glycoprotein in SARS-CoV-2 compared to SARS-CoV	10.1038/s41423-020-0385-z	2020-03-04	2020-02-27	2020-02-19	2020-02-19	Correspondence		Zheng, Ming; Song, Lun	Cellular & Molecular Immunology
Review of the Clinical Characteristics of Coronavirus Disease 2019 (COVID-19)	10.1007/s11606-020-05762-w	2020-03-04	2020-02-24	2020-02-24	2020-02-27	Review		Jiang, Fang; Deng, Liehua; Zhang, Liangqing; Cai, Yin; Cheung, Chi Wai; Xia, Zhengyuan	Journal of General Internal Medicine
Li Wenliang, a face to the frontline healthcare worker? The first doctor to notify the emergence of the SARS-CoV-2, (COVID-19), outbreak	10.1016/j.ijid.2020.02.052	2020-03-04	2020-02-23	2020-02-25		Editorial		Petersen, Eskild; Hui, David; Hamer, Davidson H.; Blumberg, Lucille; Madoff, Lawrence C.; Pollack, Marjorie; Lee, Shui Shan; McLellan, Susan; Memish, Ziad; Praharaj, Ira; Wasserman, Sean; Ntoumi, Francine; Azhar, Esam Ibraheem; McHugh, Timothy D.; Kock, Richard; Ippolito, Guiseppe; Zumla, Ali; Koopmans, Marion	International Journal of Infectious Diseases
A conceptual model for the outbreak of Coronavirus disease 2019 (COVID-19) in Wuhan, China with individual reaction and governmental action	10.1016/j.ijid.2020.02.058	2020-03-04	2020-02-24	2020-01-31	2020-02-27	Research		Lin, Qianying; Zhao, Shi; Gao, Daozhou; Lou, Yijun; Yang, Shu; Musa, Salihu S.; Wang, Maggie H.; Cai, Yongli; Wang, Weiming; Yang, Lin; He, Daihai	International Journal of Infectious Diseases
Serial interval of novel coronavirus (COVID-19) infections	10.1016/j.ijid.2020.02.060	2020-03-04	2020-02-12	2020-02-14	2020-02-27	Research		Nishiura, Hiroshi; Linton, Natalie M.; Akhmetzhanov, Andrei R.	International Journal of Infectious Diseases
CT Imaging and Differential Diagnosis of COVID-19	10.1177/0846537120913033	2020-03-04	2020-02-25			Case Study		Dai, Wei-cai; Zhang, Han-wen; Yu, Juan; Xu, Hua-jian; Chen, Huan; Luo, Si-ping; Zhang, Hong; Liang, Li-hong; Wu, Xiao-liu; Lei, Yi; Lin, Fan	Canadian Association of Radiologists Journal
COVID-19: What Can We Learn From Stories From the Trenches?	10.1177/0846537120913497	2020-03-04				Editorial		Patlas, Michael N.	Canadian Association of Radiologists Journal
Hematologic parameters in patients with COVID-19 infection	10.1002/ajh.25774	2020-03-04	2020-02-28	2020-03-02	2020-03-03	Case Study		Fan, Bingwen Eugene; Chong, Vanessa Cui Lian; Chan, Stephrene Seok Wei; Lim, Gek Hsiang; Lim, Kian Guan Eric; Tan, Guat Bee; Mucheli, Sharavan Sadasiv; Kuperan, Ponnudurai; Ong, Kiat Hoe	Am Journal Hematol
2019 novel coronavirus is undergoing active recombination	10.1093/cid/ciaa219	2020-03-04	2020-02-12	2020-02-14		Research		Yi, Huiguang	Clinical Infectious Diseases
Angiotensin receptor blockers as tentative SARS-CoV-2 therapeutics	10.1002/ddr.21656	2020-03-04		2020-02-25	2020-02-27	Commentary		Gurwitz, David	Drug Dev Res
The coronavirus 2019-nCoV epidemic: Is hindsight 20/20?	10.1016/j.eclinm.2020.100289	2020-03-04		2020-02-05	2020-02-07	Commentary		Malta, Monica; Rimoin, Anne W.; Strathdee, Steffanie A.	EClinicalMedicine
Uncertainties about the transmission routes of 2019 novel coronavirus	10.1111/irv.12735	2020-03-04		2020-02-18	2020-02-20	Commentary		Han, Qingmei; Lin, Qingqing; Ni, Zuowei; You, Liangshun	Influenza and Other Respiratory Viruses
Prediction of Epidemic Spread of the 2019 Novel Coronavirus Driven by Spring Festival Transportation in China: A Population-Based Study	10.3390/ijerph17051679	2020-03-04		2020-02-07	2020-02-29	Research		Fan, Changyu; Liu, Linping; Guo, Wei; Yang, Anuo; Ye, Chenchen; Jilili, Maitixirepu; Ren, Meina; Xu, Peng; Long, Hexing; Wang, Yufan	International Journal of Environmental Research and Public Health
Novel Coronavirus Disease 2019 (COVID-19): An Emerging Infectious Disease in the 21st Century		2020-03-04		2020-03-04	2020-03-04	Review		Keshavarz, Ahmad Tavakoli; Katayon, Vahdat; Mohsen	Iranian South Medical Journal
Has China faced only a herald wave of SARS-CoV-2?	10.1016/S0140-6736(20)30521-3	2020-03-04	2020-03-02			Correspondence		Flahault, Antoine	The Lancet
Air, Surface Environmental, and Personal Protective Equipment Contamination by Severe Acute Respiratory Syndrome Coronavirus 2 (SARS-CoV-2) From a Symptomatic Patient	10.1001/jama.2020.3227	2020-03-04	2020-02-04		2020-02-27	Case Study		Ong, Sean Wei Xiang; Tan, Yian Kim; Chia, Po Ying; Lee, Tau Hong; Ng, Oon Tek; Wong, Michelle Su Yen; Marimuthu, Kalisvar	JAMA
Understanding the emerging coronavirus: what it means for health security and infection prevention	10.1016/j.jhin.2020.02.023	2020-03-04		2020-02-25	2020-02-28	Commentary		Peters, Alexandra; Vetter, Pauline; Guitart, Chloé; Lotfinejad, Nasim; Pittet, Didier	Journal of Hospital Infection
Insights into the cross-species evolution of 2019 novel coronavirus	10.1016/j.jinf.2020.02.025	2020-03-04	2020-03-07		2020-02-26	Research		Zhang, Jiahao; Jia, Weixin; Zhu, Junhai; Li, Bo; Xing, Jinchao; Liao, Ming; Qi, Wenbao	Journal of Infection
Lymphopenic community acquired pneumonia as signature of severe COVID-19 infection: Lymphopenia in severe COVID-19 infection	10.1016/j.jinf.2020.02.029	2020-03-04			2020-02-28	Commentary		Bermejo-Martin, Jesús F.; Almansa, Raquel; Menéndez, Rosario; Mendez, Raúl; Kelvin, David J.; Torres, Antoni	Journal of Infection
Public health might be endangered by possible prolonged discharge of SARS-CoV-2 in stool	10.1016/j.jinf.2020.02.031	2020-03-04	2020-02-28		2020-02-28	Commentary		He, Yu; Wang, Zhengli; Li, Fang; Shi, Yuan	Journal of Infection
Asymptomatic carrier state, acute respiratory disease, and pneumonia due to severe acute respiratory syndrome coronavirus 2 (SARSCoV-2): Facts and myths	10.1016/j.jmii.2020.02.012	2020-03-04	2020-02-21	2020-02-25	2020-02-25	Review		Lai, Chih-Cheng; Liu, Yen Hung; Wang, Cheng-Yi; Wang, Ya-Hui; Hsueh, Shun-Chung; Yen, Muh-Yen; Ko, Wen-Chien; Hsueh, Po-Ren	Journal of Microbiology, Immunology and Infection
Coronavirus nixes conference, twilight zone beckons and a faded star brightens	10.1038/d41586-020-00589-1	2020-03-04				News Item		Nature	Nature
Behind the scenes in the biosafety office	10.1038/d41586-020-00593-5	2020-03-04				Commentary		Powell, Kendall	Nature
Insights into the Recent 2019 Novel Coronavirus (SARS-CoV-2) in Light of Past Human Coronavirus Outbreaks	10.3390/pathogens9030186	2020-03-04		2020-02-05	2020-03-02	Review		Ashour, M. Hossam; Elkhatib, F. Walid; Rahman, M. Md; Elshabrawy, A. Hatem	Pathogens
Traditional Chinese Medicine for COVID-19 Treatment	10.1016/j.phrs.2020.104743	2020-03-04		2020-03-01		Case Study		Ren, Jun-ling; Zhang, Ai-Hua; Wang, Xi-Jun	Pharmacological Research
Covert COVID-19 and false-positive dengue serology in Singapore	10.1016/S1473-3099(20)30158-4	2020-03-04	2020-02-13			Case Study		Yan, Gabriel; Lee, Chun Kiat; Lam, Lawrence T. M.; Yan, Benedict; Chua, Ying Xian; Lim, Anita Y. N.; Phang, Kee Fong; Kew, Guan Sen; Teng, Hazel; Ngai, Chin Hong; Lin, Li; Foo, Rui Min; Pada, Surinder; Ng, Lee Ching; Tambyah, Paul Anantharajah	The Lancet Infectious Diseases
‘We had to act.’ How coronavirus fears forced physics society to nix giant meeting	10.1126/science.abb5683	2020-03-04	2020-02-29			News Item		Cho, Adrian	Sccience
Structural basis for the recognition of the SARS-CoV-2 by full-length human ACE2	10.1126/science.abb2762	2020-03-04		2020-02-12	2020-03-03	Research		Yan, R.; Zhang, Y.; Li, Y.; Xia, L.; Guo, Y.; Zhou, Q.	Science
Of chloroquine and COVID-19	10.1016/j.antiviral.2020.104762	2020-03-05		2020-02-29	2020-03-02	Commentary	Revised 2 March 2020	Touret, Franck; de Lamballerie, Xavier	Antiviral Research
China’s response to a novel coronavirus stands in stark contrast to the 2002 SARS outbreak response	10.1038/s41591-020-0816-5	2020-03-05				Correction	Correction	Nkengasong, J.	Nature medicine
SARS-CoV-2 Cell Entry Depends on ACE2 and TMPRSS2 and Is Blocked by a Clinically Proven Protease Inhibitor	10.1016/j.cell.2020.02.052	2020-03-05		2020-02-06	2020-02-25	Research		Hoffmann, Markus; Kleine-Weber, Hannah; Schroeder, Simon; Krüger, Nadine; Herrler, Tanja; Erichsen, Sandra; Schiergens, Tobias S.; Herrler, Georg; Wu, Nai-Huei; Nitsche, Andreas; Müller, Marcel A.; Drosten, Christian; Pöhlmann, Stefan	Cell
COVID-19 and the cardiovascular system	10.1038/s41569-020-0360-5	2020-03-05				Commentary		Zheng, Ying-Ying; Ma, Yi-Tong; Zhang, Jin-Ying; Xie, Xiang	Nature Reviews Cardiology
Prepare for a pandemic	10.1136/bmj.m864	2020-03-05	2020-03-03			Commentary		Hurley, Richard	BMJ
Covid-19: 90% of cases will hit NHS over nine week period, chief medical officer warns	10.1136/bmj.m918	2020-03-05	2020-03-05			News Item		Mahase, Elisabeth	BMJ
Novel corona virus disease (COVID-19) in pregnancy: What clinical recommendations to follow?	10.1111/aogs.13836	2020-03-05				Editorial		Liang, Huan; Acharya, Ganesh	Acta Obstetricia et Gynecologica Scandinavica
CT Features of Coronavirus Disease 2019 (COVID-19) Pneumonia in 62 Patients in Wuhan, China	10.2214/ajr.20.22975	2020-03-05	2020-02-17			Case Study		Zhou, S.; Wang, Y.; Zhu, T.; Xia, L.	AJR. American journal of roentgenology
Lack of Vertical Transmission of Severe Acute Respiratory Syndrome Coronavirus 2, China	10.3201/eid2606.200287	2020-03-05	2020-02-24			Case Study		Li, Y.; Zhao, R.; Zheng, S.; Chen, X.; Wang, J.; Sheng, X.; Zhou, J.; Cai, H.; Fang, Q.; Yu, F.; Fan, J.; Xu, K.; Chen, Y.; Sheng, J.	Emerging infectious diseases
Evaluation of a quantitative RT-PCR assay for the detection of the emerging coronavirus SARS-CoV-2 using a high throughput system	10.2807/1560-7917.ES.2020.25.9.2000152	2020-03-05	2020-03-03	2020-02-14	2020-03-04	Research		Pfefferle, Susanne; Reucher, Svenja; Nörz, Dominic; Lütgehetmann, Marc	Eurosurveillance
Rapid establishment of laboratory diagnostics for the novel coronavirus SARS-CoV-2 in Bavaria, Germany, February 2020	10.2807/1560-7917.ES.2020.25.9.2000173	2020-03-05	2020-02-11	2020-02-21	2020-03-04	Report		Konrad, Regina; Eberle, Ute; Dangel, Alexandra; Treis, Bianca; Berger, Anja; Bengs, Katja; Fingerle, Volker; Liebl, Bernhard; Ackermann, Nikolaus; Sing, Andreas	Eurosurveillance
Updated rapid risk assessment from ECDC on the outbreak of COVID-19: increased transmission globally	10.2807/1560-7917.ES.2020.25.9.2003051	2020-03-05	2020-03-02			Report		team, Eurosurveillance editorial	Eurosurveillance
SARS-CoV-2: a potential novel etiology of fulminant myocarditis	10.1007/s00059-020-04909-z	2020-03-05				Recommendation		Chen, Chen; Zhou, Yiwu; Wang, Dao Wen	Herz
Understanding COVID-19 new diagnostic guidelines - a message of reassurance from an internal medicine doctor in Shanghai	10.4414/smw.2020.20216	2020-03-05				Commentary		Bischof, E.; Chen, G.; Ferretti, M. T.	Swiss medical weekly
Recurrence of positive SARS-CoV-2 RNA in COVID-19: A case report	10.1016/j.ijid.2020.03.003	2020-03-05	2020-02-17	2020-02-21	2020-03-02	Case Study		Chen, Dabiao; Xu, Wenxiong; Lei, Ziying; Huang, Zhanlian; Liu, Jing; Gao, Zhiliang; Peng, Liang	International Journal of Infectious Diseases
SARS-CoV-2 induced diarrhoea as onset symptom in patient with COVID-19	10.1136/gutjnl-2020-320891	2020-03-05	2020-02-16	2020-02-12	2020-02-27	Case Study		Song, Y.; Liu, P.; Shi, X. L.; Chu, Y. L.; Zhang, J.; Xia, J.; Gao, X. Z.; Qu, T.; Wang, M. Y.	Gut
Emergency management for preventing and controlling nosocomial infection of 2019 novel coronavirus: implications for the dermatology department	10.1111/bjd.19011	2020-03-05	2020-02-15			Perspective		Tao, J.; Song, Z.; Yang, L.; Huang, C.; Feng, A.; Man, X.	British Journal of Dermatology
The explosive epidemic outbreak of novel coronavirus disease 2019 (COVID-19) and the persistent threat of respiratory tract infectious diseases to global health security	10.1097/mcp.0000000000000676	2020-03-05				Editorial		Zumla, A.; Niederman, M. S.	Current opinion in pulmonary medicine
Escalating infection control response to the rapidly evolving epidemiology of the Coronavirus disease 2019 (COVID-19) due to SARS-CoV-2 in Hong Kong	10.1017/ice.2020.58	2020-03-05				Research		Cheng, Vincent C. C.; Wong, Shuk-Ching; Chen, Jonathan H. K.; Yip, Cyril C. Y.; Chuang, Vivien W. M.; Tsang, Owen T. Y.; Sridhar, Siddharth; Chan, Jasper F. W.; Ho, Pak-Leung; Yuen, Kwok-Yung	Infection Control & Hospital Epidemiology
Protecting Chinese Healthcare Workers While Combating the 2019 Novel Coronavirus	10.1017/ice.2020.60	2020-03-05	2020-02-11			Commentary		Zhou, Pengcheng; Huang, Zebing; Xiao, Yinzong; Huang, Xun; Fan, Xue-Gong	Infection Control & Hospital Epidemiology
The novel coronavirus (COVID-19) infection in Hangzhou: An experience to share	10.1017/ice.2020.62	2020-03-05				Report		Diao, MengYuan; Zhang, Sheng; Chen, Dechang; Hu, Wei	Infection Control & Hospital Epidemiology
Diagnosis of SARS-CoV-2 Infection based on CT scan vs. RT-PCR: Reflecting on Experience from MERS-CoV	10.1016/j.jhin.2020.03.001	2020-03-05	2020-02-29	2020-03-01	2020-03-02	Commentary		Al-Tawfiq, Jaffar A.; Memish, Ziad A.	Journal of Hospital Infection
Exploring the reasons for healthcare workers infected with novel coronavirus disease 2019 (COVID-19) in China	10.1016/j.jhin.2020.03.002	2020-03-05	2020-02-28	2020-02-28	2020-03-02	Commentary		Wang, Jiancong; Zhou, Mouqing; Liu, Fangfei	Journal of Hospital Infection
Identification of the hyper-variable genomic hotspot for the novel coronavirus SARS-CoV-2	10.1016/j.jinf.2020.02.027	2020-03-05	2020-02-03		2020-02-29	Research	As of feb. 14	Wen, Feng; Yu, Hai; Guo, Jinyue; Li, Yong; Luo, Kaijian; Huang, Shujian	Journal of Infection
Clinical manifestations and outcome of SARS-CoV-2 infection during pregnancy	10.1016/j.jinf.2020.02.028	2020-03-05	2020-02-25		2020-02-27	Case Study		Liu, Yangli; Chen, Haihong; Tang, Kejing; Guo, Yubiao	Journal of Infection
Unique epidemiological and clinical features of the emerging 2019 novel coronavirus pneumonia (COVID-19) implicate special control measures	10.1002/jmv.25748	2020-03-05	2020-02-27	2020-02-24	2020-03-02	Review		Wang, Yixuan; Wang, Yuyi; Chen, Yan; Qin, Qingsong	Journal of Medical Virology
Structural, glycosylation and antigenic variation between 2019 novel coronavirus (2019-nCoV) and SARS coronavirus (SARS-CoV)	10.1007/s13337-020-00571-5	2020-03-05	2020-02-11	2020-01-24	2020-02-21	Research		Kumar, Swatantra; Maurya, Vimal K.; Prasad, Anil K.; Bhatt, Madan L. B.; Saxena, Shailendra K.	VirusDisease
Molecular immune pathogenesis and diagnosis of COVID-19	10.1016/j.jpha.2020.03.001	2020-03-05	2020-03-01	2020-02-24	2020-03-01	Review		Li, Xiaowei; Geng, Manman; Peng, Yizhao; Meng, Liesu; Lu, Shemin	Journal of Pharmaceutical Analysis
The Treatment and Outcome of a Lung Cancer Patient Infected with SARS-CoV-2	10.1016/j.jtho.2020.02.025	2020-03-05	2020-02-10	2020-02-28	2020-02-29	Case Study		Zhang, Hongyan; Huang, Yihua; Xie, Conghua	Journal of Thoracic Oncology
Clinical and CT features in pediatric patients with COVID-19 infection: Different points from adults	10.1002/ppul.24718	2020-03-05	2020-02-09	2020-02-14	2020-02-26	Case Study		Xia, Wei; Shao, Jianbo; Guo, Yu; Peng, Xuehua; Li, Zhen; Hu, Daoyu	Pediatric Pulmonology
Correction to Lancet Glob Health 2020; published online Feb 28. https://doi.org/10.1016/S2214-109X(20)30074-7	10.1016/S2214-109X(20)30083-8	2020-03-05				Correction			The Lancet Global Health
Can we contain the COVID-19 outbreak with the same measures as for SARS?	10.1016/S1473-3099(20)30129-8	2020-03-05				Commentary		Wilder-Smith, Annelies; Chiew, Calvin J.; Lee, Vernon J.	The Lancet Infectious Diseases
Respiratory support for patients with COVID-19 infection	10.1016/S2213-2600(20)30110-7	2020-03-05	2020-02-27			Correspondence		Namendys-Silva, Silvio A.	The Lancet Respiratory Medicine
Remdesivir as a possible therapeutic option for the COVID-19	10.1016/j.tmaid.2020.101615	2020-03-05	2020-02-25	2020-02-26	2020-03-03	Correspondence		Al-Tawfiq, Jaffar A.; Al-Homoud, Ali H.; Memish, Ziad A.	Travel Medicine and Infectious Disease
Novel coronavirus infection and pregnancy	10.1002/uog.22006	2020-03-05				Opinion		Yang, H.; Wang, C.; Poon, L. C.	Ultrasound in Obstetrics & Gynecology
With $115 million, more than 80 Boston researchers will collaborate to tackle COVID-19	10.1126/science.abb6021	2020-03-05				News Item		Couzin-Frankel, Jennifer	Science
Arguments in favor of remdesivir for treating SARS-CoV-2 infections	10.1016/j.ijantimicag.2020.105933	2020-03-06	2020-02-28	2020-02-16		Commentary		Ko, Wen-Chien; Rolain, Jean-Marc; Lee, Nan-Yao; Chen, Po-Lin; Huang, Ching-Tai; Lee, Ping-Ing; Hsueh, Po-Ren	International Journal of Antimicrobial Agents
Coronavirus disease 2019 (covid-19): a guide for UK GPs	10.1136/bmj.m800	2020-03-06	2020-03-02			Recommendation		Razai, Mohammad S.; Doerholt, Katja; Ladhani, Shamez; Oakeshott, Pippa	BMJ
Covid-19: are we getting the communications right?	10.1136/bmj.m919	2020-03-06	2020-03-03			Commentary		Cowper, A.	BMJournal (Clinical research ed.)
Covid-19: GP surgeries close for two weeks after staff test positive	10.1136/bmj.m936	2020-03-06	2020-03-04			News Item		Iacobucci, G.	BMJournal (Clinical research ed.)
Trump claims public health warnings on covid-19 are a conspiracy against him	10.1136/bmj.m941	2020-03-06	2020-03-04			News Item		Dyer, O.	BMJournal (Clinical research ed.)
Covid-19: UK records first death, as world's cases exceed 100 000	10.1136/bmj.m943	2020-03-06	2020-03-06			News Item		Mahase, E.	BMJournal (Clinical research ed.)
To ease anxiety over coronavirus, leaders prescribe dose of common sense	10.1002/adaw.32649	2020-03-06				Commentary		Enos, Gary	Alcoholism & Drug Abuse Weekly
What we do when a COVID-19 patient needs an operation: operating room preparation and guidance	10.1007/s12630-020-01617-4	2020-03-06		2020-03-01	2020-03-03	Recommendation		Ti, Lian Kah; Ang, Lin Stella; Foong, Theng Wai; Ng, Bryan Su Wei	Canadian Journal of Anesthesia/Journal canadien d'anesthésie
Patients with RT-PCR Confirmed COVID-19 and Normal Chest CT	10.1148/radiol.2020200702	2020-03-06				Commentary		Yang, W.; Yan, F.	Radiology
FDG PET/CT of COVID-19	10.1148/radiol.2020200770	2020-03-06				Case Study		Zou, S.; Zhu, X.	Radiology
Machine Learning, COVID-19 (2019-nCoV), and multi-OMICS	10.1002/cyto.a.23990	2020-03-06				Editorial		Tárnok, Attila	Cytometry Part A
Immediate Psychological Responses and Associated Factors during the Initial Stage of the 2019 Coronavirus Disease (COVID-19) Epidemic among the General Population in China	10.3390/ijerph17051729	2020-03-06	2020-02-02	2020-02-14	2020-03-03	Research		Wang, Cuiyan; Pan, Riyu; Wan, Xiaoyang; Tan, Yilin; Xu, Linkang; Ho, S. Cyrus; Ho, C. Roger	International Journal of Environmental Research and Public Health
Are high-performing health systems resilient against the COVID-19 epidemic?	10.1016/S0140-6736(20)30551-1	2020-03-06	2020-03-05			Commentary		Legido-Quigley, Helena; Asgari, Nima; Teo, Yik Ying; Leung, Gabriel M.; Oshitani, Hitoshi; Fukuda, Keiji; Cook, Alex R.; Hsu, Li Yang; Shibuya, Kenji; Heymann, David	The Lancet
Managing neonates with respiratory failure due to SARS-CoV-2 – Authors' reply	10.1016/S2352-4642(20)30072-9	2020-03-06				Correspondence		Wang, Jianhui; Shi, Yuan	The Lancet Child & Adolescent Health
Duration of quarantine in hospitalized patients with severe acute respiratory syndrome coronavirus 2 (SARS-CoV-2) infection: a question needing an answer	10.1016/j.jhin.2020.03.003	2020-03-06	2020-02-26	2020-02-28	2020-03-02	Commentary		Lombardi, Andrea; Bozzi, Giorgio; Mangioni, Davide; Muscatello, Antonio; Peri, Anna Maria; Taramasso, Lucia; Ungaro, Riccardo; Bandera, Alessandra; Gori, Andrea	Journal of Hospital Infection
The transmission and diagnosis of 2019 novel coronavirus infection disease (COVID-19): A Chinese perspective	10.1002/jmv.25749	2020-03-06	2020-02-19	2020-02-21	2020-03-04	Review		Han, Y.; Yang, H.	Journal of medical virology
Transmission dynamics of the COVID-19 outbreak and effectiveness of government interventions: A data-driven analysis	10.1002/jmv.25750	2020-03-06	2020-02-29	2020-02-25	2020-03-04	Research	As of Feb 29	Fang, Y.; Nie, Y.; Penny, M.	Journal of medical virology
Quantitative computed tomography analysis for stratifying the severity of Coronavirus Disease 2019	10.1016/j.jpha.2020.03.004	2020-03-06	2020-02-07	2020-02-27	2020-03-04	Case Study		Shen, Cong; Yu, Nan; Cai, Shubo; Zhou, Jie; Sheng, Jiexin; Liu, Kang; Zhou, Heping; Guo, Youmin; Niu, Gang	Journal of Pharmaceutical Analysis
Editorial: Coronaviruses: Facts, Myths and Hypotheses	10.1016/j.jtho.2020.02.024	2020-03-06	2020-02-26	2020-02-27	2020-02-28	Perspective		Carbone, Michele; Green, Joshua B.; Bucci, Enrico M.; Lednicky, John J.	Journal of Thoracic Oncology
The Novel Coronavirus – A Snapshot of Current Knowledge	10.1111/1751-7915.13557	2020-03-06	2020-02-29			Review		Brüssow, Harald	Microbial Biotechnology
And now for something completely different: from 2019-nCoV and COVID-19 to 2020-nMan	10.1016/j.pulmoe.2020.02.010	2020-03-06	2020-02-25			News Item		Froes, F.	Pulmonology
The outbreak of SARS-CoV-2 pneumonia calls for viral vaccines	10.1038/s41541-020-0170-0	2020-03-06	2020-02-20	2020-02-11	2020-02-21	Commentary		Shang, Weilong; Yang, Yi; Rao, Yifan; Rao, Xiancai	npj Vaccines
Can China's COVID-19 strategy work elsewhere?	10.1126/science.367.6482.1061	2020-03-06				Commentary		Kupferschmidt, K.; Cohen, J.	Science
The effect of travel restrictions on the spread of the 2019 novel coronavirus (COVID-19) outbreak	10.1126/science.aba9757	2020-03-06		2020-01-20	2020-03-05	Research		Chinazzi, M.; Davis, J. T.; Ajelli, M.; Gioannini, C.; Litvinova, M.; Merler, S.; Pastore, Y. Piontti A.; Mu, K.; Rossi, L.; Sun, K.; Viboud, C.; Xiong, X.; Yu, H.; Halloran, M. E.; Longini, I. M., Jr.; Vespignani, A.	Science
Why airport screening won’t stop the spread of coronavirus	10.1126/science.abb6136	2020-03-06	2020-03-01			News Item		Normile, Dennis	Science
Quarantined at home now, U.S. scientist describes his visit to China’s hot zone	10.1126/science.abb6154	2020-03-06	2020-03-04			News Item		Cohen, Jon	Science
Coronavirus disruptions could hurt North Korea’s efforts to treat tuberculosis	10.1126/science.abb6184	2020-03-06	2020-03-01			News Item		Stone, Richard	Science
Top stories: Bungled coronavirus testing, disarming ‘atomic bomb’ cells, and jet stream blocking	10.1126/science.abb6188	2020-03-06				News Item		Pérez Ortega, Rodrigo	Science
Positive rate of RT-PCR detection of SARS-CoV-2 infection in 4880 cases from one hospital in Wuhan, China, from Jan to Feb 2020	10.1016/j.cca.2020.03.009	2020-03-07	2020-03-02	2020-03-02	2020-03-06	Case Study		Liu, Rui; Han, Huan; Liu, Fang; Lv, Zhihua; Wu, Kailang; Liu, Yingle; Feng, Yong; Zhu, Chengliang	Clinica Chimica Acta
Containing 2019-nCoV (Wuhan) coronavirus	10.1007/s10729-020-09504-6	2020-03-07		2020-02-06	2020-02-12	Commentary		Kaplan, Edward H.	Health Care Management Science
The danger of stories in global health	10.1016/S0140-6736(20)30427-X	2020-03-07				Perspective		Harman, Sophie	The Lancet
COVID-19: too little, too late?	10.1016/S0140-6736(20)30522-5	2020-03-07	2020-03-03			Editorial		The, Lancet	The Lancet
2019-novel coronavirus outbreak: A new challenge	10.1016/j.jgar.2020.02.021	2020-03-07		2020-02-05	2020-02-21	Review		Lupia, Tommaso; Scabini, Silvia; Pinna, Simone Mornese; Di Perri, Giovanni; De Rosa, Francesco Giuseppe; Corcione, Silvia	Journal of Global Antimicrobial Resistance
The Novel Coronavirus 2019 Epidemic and Kidneys	10.1016/j.kint.2020.03.001	2020-03-07	2020-02-17			Report		Naicker, Saraladevi; Yang, Chih-Wei; Hwang, Shang-Jyh; Liu, Bi-Cheng; Chen, Jiang-Hua; Jha, Vivekanand	Kidney International
The ongoing crises in China illustrate that the assessment of epidemics in isolation is no longer sufficient	10.1111/tbed.13536	2020-03-07				Commentary		Stoffel, Carla; Schuppers, Manon; Buholzer, Patrik; Munoz, Violeta; Lechner, Isabel; Sperling, Ulrich; Küker, Susanne; De Nardi, Marco	Transboundary and Emerging Diseases
Coronavirus outbreaks: prevention and management recommendationsAB - What role can pharmacists play? The International Pharmaceutical Federation is emphasizing the active role of community and hospital pharmacists can play in preventing the spread of COVID-19 [17]. Pharmacists are often a reliable and first point of contact for individuals having concerns or needing information and advice regardi…	10.1007/s40267-020-00717-x	2020-03-07				Commentary		Khan, Zakir; Muhammad, Khayal; Ahmed, Ali; Rahman, Hazir	Drugs Ther Perspect
An outbreak of COVID -19 caused by a new coronavirus: what we know so far	10.5694/mja2.50530	2020-03-08	2020-02-26			Perspective		Cheng, Allen C.; Williamson, Deborah A.	Medical Journal of Australia
Understanding Unreported Cases in the COVID-19 Epidemic Outbreak in Wuhan, China, and the Importance of Major Public Health Interventions	10.3390/biology9030050	2020-03-08	2020-01-31	2020-02-04	2020-02-28	Research		Liu, Zhihua; Magal, Pierre; Seydi, Ousmane; Webb, Glenn	Biology
Positive result of Sars-Cov-2 in sputum from a cured patient with COVID-19	10.1016/J.TMAID.2020.101619	2020-03-08	2020-02-13	2020-03-05	2020-03-05	Case Study		Qu, Ye-Min; Cong, Hai-Yan	Travel Medicine and Infectious Disease
In Vitro Antiviral Activity and Projection of Optimized Dosing Design of Hydroxychloroquine for the Treatment of Severe Acute Respiratory Syndrome Coronavirus 2 (SARS-CoV-2)	10.1093/cid/ciaa237	2020-03-09		2020-02-25		Research		Xueting Yao, Fei Ye, Miao Zhang, Cheng Cui, Baoying Huang, Peihua Niu, Xu Liu, Li Zhao, Erdan Dong, Chunli Song, Siyan Zhan, Roujian Lu, Haiyan Li, Wenjie Tan, Dongyang Liu	Clinical Infectious Diseases
The novel coronavirus outbreak: what can be learned from China in public reporting?	10.1186/s41256-020-00140-9	2020-03-09	2020-02-27	2020-02-21	2020-03-02	Commentary		Li, Hao; Chen, Xinguang; Huang, Hao	Global Health Research and Policy
Coronavirus disease-2019: is fever an adequate screening for the returning travelers?	10.1186/s41182-020-00201-2	2020-03-09		2020-02-17	2020-03-02	Commentary		Bwire, George M.; Paulo, Linda S.	Tropical Medicine and Health
Genomic diversity of SARS-CoV-2 in Coronavirus Disease 2019 patients	10.1093/cid/ciaa203	2020-03-09	2020-02-22	2020-02-18		Research		Shen, Zijie; Xiao, Yan; Kang, Lu; Ma, Wentai; Shi, Leisheng; Zhang, Li; Zhou, Zhuo; Yang, Jing; Zhong, Jiaxin; Yang, Donghong; Guo, Li; Zhang, Guoliang; Li, Hongru; Xu, Yu; Chen, Mingwei; Gao, Zhancheng; Wang, Jianwei; Ren, Lili; Li, Mingkun	Clinical Infectious Diseases
Potential Presymptomatic Transmission of SARS-CoV-2, Zhejiang Province, China, 2020	10.3201/eid2605.200198	2020-03-09	2020-01-20			Case Study		Tong, Zhen-Dong; Tang, An; Li, Ke-Feng; Li, Peng; Wang, Hong-Ling; Yi, Jing-Ping; Zhang, Yong-Li; Yan, Jian-Bo	Emerg Infect Dis
The time-varying serial interval of the coronavirus disease (COVID-19) and its gender-specific difference: A data-driven analysis using public surveillance data in Hong Kong and Shenzhen, China from January 10 to February 15, 2020	10.1017/ice.2020.64	2020-03-09				Research		Zhao, Shi; Cao, Peihua; Chong, Marc K. C.; Gao, Daozhou; Lou, Yijun; Ran, Jinjun; Wang, Kai; Wang, Weiming; Yang, Lin; He, Daihai; Wang, Maggie H.	Infection Control & Hospital Epidemiology
Broad Spectrum Antiviral Agent Niclosamide and Its Therapeutic Potential	10.1021/acsinfecdis.0c00052	2020-03-10	2020-03-05	2020-02-04		Review		Xu, Jimin; Shi, Pei-Yong; Li, Hongmin; Zhou, Jia	ACS Infect Dis
Where are we now with COVID‐19?	10.1111/ijcp.13497	2020-03-11				Letter to the editor		George A. Thomson	Int Journal Clin Pract.
Are patients with hypertension and diabetes mellitus at increased risk for COVID-19 infection?	10.1016/S2213-2600(20)30116-8	2020-03-11	2020-02-28			Correspondance		Lei Fang, George Karakiulakis, Michael Roth	The Lancet Respiratory Medicine
Coronavirus disease 2019 (covid-19): a guide for UK GPs	10.1136/bmj.m989	2020-03-11				Correction		Razai, Mohammad S.; Doerholt, Katja; Ladhani, Shamez; Oakeshott, Pippa	BMJ
Emergence of a Novel Coronavirus Disease (COVID-19) and the Importance of Diagnostic Testing: Why Partnership between Clinical Laboratories, Public Health Agencies, and Industry Is Essential to Control the Outbreak	10.1093/clinchem/hvaa071	2020-03-12		2020-02-14	2020-02-18	Commentary		Binnicker, Matthew J.	Clinical Chemistry
Interrupting transmission of COVID-19: lessons from containment efforts in Singapore	10.1093/jtm/taaa039	2020-03-13	2020-03-09			Commentary		Vernon J Lee, Calvin J Chiew, Wei Xin Khong	Journal of Travel Medicine
Substantial undocumented infection facilitates the rapid dissemination of novel coronavirus (SARS-CoV2)	10.1126/science.abb3221	2020-03-16		2020-02-15	2020-03-12	Research		Ruiyun Li, Sen Pei, Bin Chen, Yimeng Song, Tao Zhang, Wan Yang, Jeffrey Shaman	Science
Editorial Concern—Possible Reporting of the Same Patients With COVID-19 in Different Reports	10.1001/jama.2020.3980	2020-03-16				Editorial		Howard Bauchner; Robert M. Golub, Jody Zylke	JAMA
Coronavirus: three things all governments and their science advisers must do now	10.1038/d41586-020-00772-4	2020-03-17				Editorial			Nature
Receptor recognition by novel coronavirus from Wuhan: An analysis based on decade-long structural studies of SARS	10.1128/JVI.00127-20	2020-03-17		2020-01-22	2020-01-28	Research		Wan, Yushun; Shang, Jian; Graham, Rachel; Baric, Ralph S.; Li, Fang	Journal of Virology
A Trial of Lopinavir–Ritonavir in Adults Hospitalized with Severe Covid-19	10.1056/NEJMoa2001282	2020-03-18				Research		Cao et al.	New England Journal of Medicine
Correction to: COVID-19: a novel coronavirus and a novel challenge for critical care	10.1007/s00134-020-06009-2	2020-03-18				Correction		Arabi, Yaseen M.; Murthy, Srinivas; Webb, Steve	Intensive Care Med
What we know so far: COVID-19 current clinical knowledge and research	10.7861/clinmed.2019-coron	2020-03-18				Review		Lake, M. A.	Clinical medicine (London, England)
Outbreak investigation for COVID-19 in northern Vietnam	10.1016/S1473-3099(20)30159-6	2020-03-18				Correction		Thanh, Hai Nguyen; Van, Truong Nguyen; Thu, Huong Ngo Thi; Van, Binh Nghiem; Thanh, Binh Doan; Thu, Ha Phung Thi; Kieu, Anh Nguyen Thi; Viet, Nhung Nguyen; Marks, Guy B.; Fox, Greg J.; Nguyen, Thu-Anh	The Lancet Infectious Diseases
What can early Canadian experience screening for COVID-19 teach us about how to prepare for a pandemic?	10.1503/cmaj.200305	2020-03-22		2020-03-06		Report		Lin, M.; Beliavsky, A.; Katz, K.; Powis, J. E.; Ng, W.; Williams, V.; Science, M.; Groves, H.; Muller, M. P.; Vaisman, A.; Hota, S.; Johnstone, J.; Leis, J. A.	CMAJournal : Canadian Medical Association journal = journal de l'Association medicale canadienne
Novel coronavirus COVID-19: an overview for emergency clinicians		2020-03-23	2020-03-17			Review		Giwa, A.; Desai, A.	Emergency medicine practice
Cross-species transmission of the newly identified coronavirus 2019-nCoV	10.1002/jmv.25682		2020-01-20	2020-01-17	2020-01-21	Research		Ji, W.; Wang, W.; Zhao, X.; Zai, J.; Li, X.	Journal of medical virology
Clinical features of patients infected with 2019 novel coronavirus in Wuhan, China	10.1016/S0140-6736(20)30252-X					Correction	Corrected on 30.Jan.2020; 2020.01.24 also appears in the article	Huang, C.; Wang, Y.; Li, X.	The Lancet
Which lessons shall we learn from the 2019 novel coronavirus outbreak?	10.21037/atm.2020.02.06		2020-02-02	2020-02-02	2020-02-04	Commentary		Mattiuzzi, Camilla; Lippi, Giuseppe	Annals of Translational Medicine
Chinese expert consensus on the perinatal and neonatal management for the prevention and control of the 2019 novel coronavirus infection (First edition)	10.21037/atm.2020.02.20			2020-02-02	2020-02-06			Wang, Laishuan; Shi, Yuan; Xiao, Tiantian; Fu, Jianhua; Feng, Xing; Mu, Dezhi; Feng, Qi; Hei, Mingyan; Hu, Xiaojing; Li, Zhankui; Lu, Guoping; Tang, Zezhong; Wang, Yajuan; Wang, Chuanqing; Xia, Shiwen; Xu, Jianqing; Yang, Yujia; Yang, Jie; Zeng, Mei; Zheng, Jun; Zhou, Wei; Zhou, Xiaoyu; Zhou, Xiaoguang; Du, Lizhong; Lee, Shoo K.; Zhou, Wenhao; Working Comm Perinatal, Neona	Annals of Translational Medicine
Note from the editors: novel coronavirus (2019-nCoV)	10.2807/1560-7917.ES.2020.25.3.2001231		2020-01-23			Editorial			Eurosurveillance
Epidemiological Characteristics of 2143 Pediatric Patients With 2019 Coronavirus Disease in China	10.1542/peds.2020-0702		2020-02-08			Case study	as of 3.03.2020	Yuanyuan Dong, Xi Mo, Yabin Hu, Xin Qi, Fang Jiang, Zhongyi Jiang and Shilu Tong	Pediatrics
A Chinese Case of COVID-19 Did Not Show Infectivity During the Incubation Period: Based on an Epidemiological Survey	10.3961/jpmph.20.048			2020-02-17	2020-02-27	Case Study		Bae, Jong-Myon	Journal Prev Med Public Health
THREE NOTICEABLE ISSUES ON NOVEL CORONAVIRUS: A QUICK LOOK FROM VIETNAM’S CIRCUMSTANCES	10.33546/bnj.1058			2020-02-06	2020-02-14	Commentary		Tuyen, Le Thi Thanh	Belitung Nursing Journal
Statistics-Based Predictions of Coronavirus Epidemic Spreading in Mainland China	10.20535/ibb.2020.4.1.195074		2020-02-14	2020-02-10	2020-02-18	Research		Nesteruk, Igor	Innovative Biosystems and Bioengineering
Clinical analysis of 10 neonates born to mothers with 2019-nCoV pneumonia	10.21037/tp.2020.02.06		2020-02-05	2020-02-06	2020-02-10	Case Study		['Zhu, Huaping', 'Wang, Lin', 'Fang, Chengzhi', 'Peng, Sicong', 'Zhang, Lianhong', 'Chang, Guiping', 'Xia, Shiwen', 'Zhou, Wenhao']
Data sharing for novel coronavirus (COVID-19)	10.2471/BLT.20.251561					Editorial		['Moorthy, Vasee', 'Henao Restrepo, Ana Maria', 'Preziosi, Marie-Pierre', 'Swaminathan, Soumya']	Bull World Health Organ
Caring for persons in detention suffering with mental illness during the Covid-19 outbreak	10.1016/j.fsiml.2020.100013							Liebrenz, M.; Bhugra, D.; Buadze, A.; Schleifer, R.	Forensic Science International: Mind and Law
The 2019 Novel Coronavirus (2019-nCoV): Novel Virus, Old Challenges	10.20344/amp.13547			2020-02-05	2020-02-05	Commentary		Duarte, Raquel; Furtado, Isabel; Sousa, Luís; Carvalho, Carlos Filipe Afonso	Acta Med Port
Fighting the novel coronavirus: the publication of the Chinese expert consensus on the perinatal and neonatal management for the prevention and control of the 2019 novel coronavirus infection (First edition)	10.21037/apm.2020.02.02		2020-02-06	2020-02-07	2020-02-07	News Item		Editorial, Office	Ann Palliat Med
Perspectives on monoclonal antibody therapy as potential therapeutic intervention for Coronavirus disease-19 (COVID-19)	10.12932/ap-200220-0773					Review		Shanmugaraj, B.; Siriwattananon, K.; Wangkanont, K.; Phoolcharoen, W.	Asian Pacific journal of allergy and immunology
Outbreak of COVID-19 - an urgent need for good science to silence our fears?	10.11622/smedj.2020018					Editorial		Lum, Lionel Hw; Tambyah, Paul A.	Singapore Med J
Epidemiological characteristics of 2019-ncoV infections in Shaanxi, China by February 8, 2020	10.1183/13993003.00310-2020		2020-02-08	2020-02-10	2020-02-22	Case Study		Yao, Y.; Tian, Y.; Zhou, J.; Ma, X.; Yang, M.; Wang, S.	The European respiratory journal
The clinical dynamics of 18 cases of COVID-19 outside of Wuhan, China	10.1183/13993003.00398-2020		2020-02-07	2020-02-09		Case Study	As of 22, Feb	Wang, L.; Gao, Y. H.; Lou, L. L.; Zhang, G. J.	The European respiratory journal
Immune responses in COVID-19 and potential vaccines: Lessons learned from SARS and MERS epidemic	10.12932/ap-200220-0772		2020-02-20			Review		Prompetchara, E.; Ketloy, C.; Palaga, T.	Asian Pacific journal of allergy and immunology
Novel coronavirus 2019-nCoV: prevalence, biological and clinical characteristics comparison with SARS-CoV and MERS-CoV	10.26355/eurrev_202002_20379		2020-02-07			Review		Meo, S. A.; Alhowikan, A. M.; Al-Khlaiwi, T.; Meo, I. M.; Halepoto, D. M.; Iqbal, M.; Usmani, A. M.; Hajjar, W.; Ahmed, N.	European review for medical and pharmacological sciences
Severe acute respiratory symptoms and suspected sars again 2020	10.12809/hkmj208375					Commentary		Hon, K. L.; Leung, K. K. Y.	Hong Kong Medical Journal
History is repeating itself, a probable zoonotic spillover as a cause of an epidemic: the case of 2019 novel Coronavirus						Editorial		Rodriguez-Morales, Alfonso J.; Bonilla-Aldana, D. Katterine; Balbin-Ramon, Graciela Josefina; Rabaan, Ali A.; Sah, Ranjit; Paniz-Mondolfi, Alberto; Pagliano, Pasquale; Esposito, Silvano	Infez Med
Correction to Lancet Infect Dis 2019; 20: 275–76	10.1016/S1473-3099(20)30071-2					Correction			The Lancet Infectious Diseases

## Sheet: Pre COVID papers
Title	DOI	Published	Received	Accepted	Authors	Journal		Time to Acceptance (days)	Time to Publication (days)
Alphacoronavirus Detection in Lungs, Liver, and Intestines of Bats from Brazil	10.1007/s00248-019-01391-x	2019-05-29	2019-02-07	2019-05-15	Bittar, C., Machado, R.R.G., Comelis, M.T. et al.	Microb Ecol		97	111
SEROLOGICAL SURVEY FOR SELECT INFECTIOUS AGENTS IN WILD MAGELLANIC PENGUINS (SPHENISCUS MAGELLANICUS) IN ARGENTINA, 1994–2008	10.7589/2019-01-022	2019-06-25	2019-01-17	2019-03-28	Marcela Uhart, Ralph Eric Thijl Vanstreels, Luciana Gallo, Robert A. Cook, and William B. Karesh	Journal of Wildlife Disease		70	159
The effect of timing on community acquired respiratory virus infection mortality during the first year after allogeneic hematopoietic stem cell transplantation: a prospective epidemiological survey	10.1038/s41409-019-0698-7	2019-09-24	2019-05-31	2019-07-27	José Luis Piñana, Ariadna Pérez, Juan Montoro, Rafael Hernani, Ignacio Lorenzo, Estela Giménez, María Dolores Gómez, Manuel Guerreiro, Eva María González-Barberá, Carlos Carretero, Miguel Salavert, Aitana Balaguer-Roselló, Guillermo Sanz, Juan Carlos Hernández-Boluda, Carlos Solano, Jaime Sanz & David Navarro	Bone Marrow Transplantation		57	116
Influenza vaccination and respiratory virus interference among Department of Defense personnel during the 2017–2018 influenza season	10.1016/j.vaccine.2019.10.005	2019-10-10	2019-06-20	2019-10-01	Greg G.Wolff	Vaccine		103	112
Innate Immune Evasion by Human Respiratory RNA Viruses	10.1159/000503030	2019-10-14	2019-03-21	2019-08-07	Kikkert M.	J Innate Immun		139	207
Influences of cyclosporin A and non-immunosuppressive derivatives on cellular cyclophilins and viral nucleocapsid protein during human coronavirus 229E replication	10.1016/j.antiviral.2019.104620	2019-10-18	2019-07-12	2019-10-11	Yue Ma-Lauer et al.	Antiviral Research		91	98
Immunohistochemical and molecular detection of natural cases of bovine rotavirus and coronavirus infection causing enteritis in dairy calves	10.1016/j.micpath.2019.103814	2019-10-19	2019-05-15	2019-10-18	Shailendra Singh et al.	Microbial Pathogenesis		156	157
Porcine deltacoronavirus (PDCoV) modulates calcium influx to favor viral replication	10.1016/j.virol.2019.10.011	2019-10-22	2019-08-08	2019-10-21	Bai, DC, Fang, LR, Xia, SJ, Ke, WT, Wang, J, Wu, XL, Fang, PX, Xiao, SB,	VIROLOGY		74	75
Metagenomic Nanopore Sequencing of Influenza Virus Direct from Clinical Respiratory Samples	10.1128/JCM.00963-19	2019-10-30	2019-06-18	2019-10-21	Kuiama Lewandowski, Yifei Xu, Steven T. Pullan, Sheila F. Lumley, Dona Foster, Nicholas Sanderson, Alison Vaughan, Marcus Morgan, Nicole Bright, James Kavanagh, Richard Vipond, Miles Carroll, Anthony C. Marriott, Karen E. Gooch, Monique Andersson, Katie Jeffery, Timothy E. A. Peto, Derrick W. Crook, A. Sarah Walker, Philippa C. Matthews	Journal of Clinical Microbiology		125	134
MERS-CoV infection is associated with downregulation of genes encoding Th1 and Th2 cytokines/chemokines and elevated inflammatory innate immune response in the lower respiratory tract	10.1016/j.cyto.2019.154895	2019-11-06	2019-06-10	2019-10-17	Bandar Alosaimi et al.	Cytokine		129	149
Non-invasive bioluminescence imaging of HCoV-OC43 infection and therapy in the central nervous system of live mice	10.1016/j.antiviral.2019.104646	2019-11-06	2019-08-29	2019-11-04	Junwei Niu et al.	Antiviral Research		67	69
Nucleocapsid proteins from other swine enteric coronaviruses differentially modulate PEDV replication	10.1016/j.virol.2019.11.007	2019-11-07	2019-09-20	2019-11-05	Suttipun Sungsuwan, Anan Jongkaewwattana, Peera Jaru-Ampornpan	Virology		46	48
Rapid manipulation of the porcine epidemic diarrhea virus genome by CRISPR/Cas9 technology	10.1016/j.jviromet.2019.113772	2019-11-08	2019-03-12	2019-11-07	Qi Peng et al.	Journal of Virological Methods		240	241
Socioeconomic, geographic and climatic risk factors for canine parvovirus infection and euthanasia in Australia	10.1016/j.prevetmed.2019.104816	2019-11-10	2019-07-15	2019-10-25	Mark Kelman, Vanessa R.Barrs, Jacqueline M.Norris, Michael P.Ward	Preventive Veterinary Medicine		102	118
Inhibition of SARS-CoV 3CL protease by flavonoids	10.1080/14756366.2019.1690480	2019-11-14	2019-08-26	2019-10-29	Seri Jo, Suwon Kim, Dong Hae Shin & Mi-Sun Kim	Journal of Enzyme Inhibition and Medicinal Chemistry		64	80
Pathogenicity and immunogenicity of a new strain of porcine epidemic diarrhea virus containing a novel deletion in the N gene	10.1016/j.vetmic.2019.108511	2019-11-15	2019-06-25	2019-11-14	Xian-Wei Wang et al.	Veterinary Microbiology		142	143
Use of whole-genome sequencing in the molecular investigation of care-associated HCoV-OC43 infections in a hematopoietic stem cell transplant unit	10.1016/j.jcv.2019.104206	2019-11-16	2019-06-08	2019-10-25	Delphine Beury et al.	Journal of Clinical Virology		139	161
Receptor tyrosine kinase inhibitors block proliferation of TGEV mainly through p38 mitogen-activated protein kinase pathways	10.1016/j.antiviral.2019.104651	2019-11-18	2019-04-26	2019-11-16	Wanyu Dong et al.	Antiviral Research		204	206
Genetic, antigenic and pathogenic characterization of avian coronaviruses isolated from pheasants (Phasianus colchicus) in China	10.1016/j.vetmic.2019.108513	2019-11-20	2019-08-03	2019-11-19	Zongxi Han, Liwen Xu, Mengting Ren, Jie Sheng, Tianxin Ma, Junfeng Sun, Yan Zhao, Shengwang Liu	Veterinary Microbiology		108	109
Association between multiple respiratory viral infections and pediatric intensive care unit admission among infants with bronchiolitis	10.1016/j.arcped.2019.11.006	2019-11-25	2019-07-26	2019-11-11	P.Tsou et al.	Archives de Pédiatrie		108	122
Sero-prevalence, cross-species infection and serological determinants of prevalence of Bovine Coronavirus in Cattle, Sheep and Goats in Ghana	10.1016/j.vetmic.2019.108544	2019-12-03	2019-09-27	2019-12-02	VitusBurimuah et al.	Veterinary Microbiology		66	67
Identification of the immunodominant neutralizing regions in the spike glycoprotein of porcine deltacoronavirus	10.1016/j.virusres.2019.197834	2019-12-06	2019-04-29	2019-12-06	Rui Chen et al.	Virus Research		221	221
Identifying factors and target preventive therapies for Middle East Respiratory Syndrome sucsibtable patients	10.1016/j.jsps.2019.11.016	2019-12-07	2019-05-11	2019-11-29	['Alburikan, Khalid A.', 'Abuelizz, Hatem A.']	Saudi Pharm J		202	210
Identification of 6′-β-fluoro-homoaristeromycin as a potent inhibitor of chikungunya virus replication	10.1016/j.ejmech.2019.111956	2019-12-09	2019-11-05	2019-12-06	Young Sup Shin et al.	European Journal of Medicinal Chemistry		31	34
Assessment of hemagglutination activity of porcine deltacoronavirus	10.4142/jvs.2020.21.e12	2019-12-13	2019-07-16	2019-10-23	Yunfei Zhang et al.	Journal of Veterinary Science		99	150
Epidemiological investigation of feline infectious peritonitis in cats living in Harbin, Northeast China from 2017 to 2019 using a combination of an EvaGreen-based real-time RT-PCR and serum chemistry assays	10.1016/j.mcp.2019.101495	2019-12-14	2019-08-15	2019-12-13	Xueting Guan et al.	Molecular and Cellular Probes		120	121
Minimum Determinants of Transmissible Gastroenteritis Virus Enteric Tropism Are Located in the N-Terminus of Spike Protein	10.3390/pathogens9010002	2019-12-18	2019-11-26	2019-12-14	Carlos M. Sanchez	Pathogens		18	22
Genetic manipulation of porcine deltacoronavirus reveals insights into NS6 and NS7 functions: a novel strategy for vaccine design	10.1080/22221751.2019.1701391	2019-12-20	2019-07-09	2019-11-26	Zhang M. et al.	Emerging Microbes & Infections		140	164
Effect of Information Disclosure Policy on Control of Infectious Disease: MERS-CoV Outbreak in South Korea	10.3390/ijerph17010305	2020-01-01	2019-11-24	2019-12-31	Jin-Won Noh et al.	Int. J. Environ. Res. Public Health		37	38
Cryo-EM analysis of a feline coronavirus spike protein reveals a unique structure and camouflaging glycans	10.1073/pnas.1908898117	2020-01-03	2019-05-28	2019-12-09	Tzu-Jing Yang, Yen-Chen Chang, Tzu-Ping Ko, Piotr Draczkowski, Yu-Chun Chien, Yuan-Chih Chang, Kuen-Phon Wu, Kay-Hooi Khoo, Hui-Wen Chang, and Shang-Te Danny Hsu	PNAS		195	220
A Unique Protein Self-Assembling Nanoparticle with Significant Advantages in Vaccine Development and Production	10.1155/2020/4297937	2020-01-04	2019-05-24	2019-10-23	Daniel C. Carter et al.	Journal of Nanomaterials		152	225
Three Amino Acid Changes in Avian Coronavirus Spike Protein Allow Binding to Kidney Tissue	10.1128/JVI.01363-19	2020-01-06	2019-08-26	2019-10-25	Kim M. Bouwman, Lisa M. Parsons, Alinda J. Berends, Robert P. de Vries, John F. Cipollo, Monique H. Verheije	Journal of Virology		60	133
Isolation and Identification of Porcine Deltacoronavirus and Alteration of Immunoglobulin Transport Receptors in the Intestinal Mucosa of PDCoV-Infected Piglets	10.3390/v12010079	2020-01-09	2019-11-09	2020-01-07	Shaoju Qian et al.	Viruses		59	61
Inactivation of three emerging viruses - severe acute respiratory syndrome coronavirus, Crimean-Congo haemorrhagic fever virus and Nipah virus - in platelet concentrates by ultraviolet C light and in plasma by methylene blue plus visible light	10.1111/vox.12888	2020-01-12	2019-09-27	2019-12-18	Eickmann, Markus; Gravemann, Ute; Handke, Wiebke; Tolksdorf, Frank; Reichenberg, Stefan; Mueller, Thomas H.; Seltsam, Axel	Vox Sanguinis		82	107
Molecular characterization of variant infectious bronchitis virus in China, 2019: Implications for control programmes	10.1111/tbed.13477	2020-01-13	2019-11-05	2020-01-07	Xiaozhan Zhang, Tongwei Deng, Jianzhou Lu, Pandeng Zhao, Lulu Chen, Mengwei Qian, Yiwen Guo, Hongxing Qiao, Yaohui Xu, Yan Wang, Xinzheng Li, Guizhi Zhang, Zeng Wang, Chuanzhou Bian	Transboundary and Emerging Disease		63	69
Recent advances in the detection of respiratory virus infection in humans	10.1002/jmv.25674	2020-01-15	2019-12-23	2020-01-12	Zhang, N.; Wang, L.; Deng, X.; Liang, R.; Su, M.; He, C.; Hu, L.; Su, Y.; Ren, J.; Yu, F.; Du, L.; Jiang, S.	Journal of medical virology		20	23
Recombinant adenovirus carrying a core neutralizing epitope of porcine epidemic diarrhea virus and heat-labile enterotoxin B of Escherichia coli as a mucosal vaccine	10.1007/s00705-019-04492-7	2020-01-16	2019-08-23	2019-11-05	Do, V.T., Jang, J., Park, J. et al.	Arch Virol		74	146
Murine Coronavirus Infection Activates the Aryl Hydrocarbon Receptor in an Indoleamine 2,3-Dioxygenase-Independent Manner, Contributing to Cytokine Modulation and Proviral TCDD-Inducible-PARP Expression	10.1128/JVI.01743-19	2020-01-17	2019-10-10	2019-11-04	Matthew E. Grunewald, Mohamed G. Shaban, Samantha R. Mackin, Anthony R. Fehr, Stanley Perlman	J Virol		25	99
In Vivo Antiviral Effects of U18666A Against Type I Feline Infectious Peritonitis Virus	10.3390/pathogens9010067	2020-01-18	2019-12-18	2020-01-15	Tomoyoshi Doki et al.	Pathogens		28	31
Transmissible Gastroenteritis Virus Infection Up-Regulates FcRn Expression via Nucleocapsid Protein and Secretion of TGF-ß in Porcine Intestinal Epithelial Cells	10.3389/fmicb.2019.03085	2020-01-21	2019-10-14	2019-12-20	['Qian, Shaoju', 'Gao, Zitong', 'Cao, Rui', 'Yang, Kang', 'Cui, Yijie', 'Li, Shaowen', 'Meng, Xianrong', 'He, Qigai', 'Li, Zili']	Front Microbiol		67	99
Polymorphisms in dipeptidyl peptidase 4 reduce host cell entry of Middle East respiratory syndrome coronavirus	10.1080/22221751.2020.1713705	2020-01-21	2019-08-18	2020-01-01	Hannah Kleine-Weber, Simon Schroeder, Nadine Krüger, et al.	Emerging Microbes & Infections		136	156
Middle East Respiratory Syndrome Coronavirus Antibodies in Bactrian and Hybrid Camels from Dubai	10.1128/mSphere.00898-19	2020-01-22	2019-12-03	2019-12-26	Susanna K. P. Lau, Kenneth S. M. Li, Hayes K. H. Luk, Zirong He, Jade L. L. Teng, Kwok-Yung Yuen, Ulrich Wernery, Patrick C. Y. Woo	mSphere		23	50
Regulation of the ER Stress Response by the Ion Channel Activity of the Infectious Bronchitis Coronavirus Envelope Protein Modulates Virion Release, Apoptosis, Viral Fitness, and Pathogenesis	10.3389/fmicb.2019.03022	2020-01-24	2019-10-14	2019-12-17	['Li, Shumin', 'Yuan, Lixia', 'Dai, Guo', 'Chen, Rui Ai', 'Liu, Ding Xiang', 'Fung, To Sing']	Front Microbiol		64	102
Novel Insights Into Immune Systems of Bats	10.3389/fimmu.2020.00026	2020-01-24	2019-10-28	2020-01-08	['Banerjee, Arinjay', 'Baker, Michelle L.', 'Kulcsar, Kirsten', 'Misra, Vikram', 'Plowright, Raina', 'Mossman, Karen']	Front Immunol		72	88
Comprehensive Genomic Characterization Analysis of lncRNAs in Cells With Porcine Delta Coronavirus Infection	10.3389/fmicb.2019.03036	2020-01-28	2019-09-03	2019-12-17	['Liu, Junli', 'Wang, Fangfang', 'Du, Liuyang', 'Li, Juan', 'Yu, Tianqi', 'Jin, Yulan', 'Yan, Yan', 'Zhou, Jiyong', 'Gu, Jinyan']	Front Microbiol		105	147
Discovery of Bat Coronaviruses through Surveillance and Probe Capture-Based Next-Generation Sequencing	10.1128/mSphere.00807-19	2020-01-29	2019-11-06	2019-12-19	Bei Li, Hao-Rui Si, Yan Zhu, Xing-Lou Yang, Danielle E. Anderson, Zheng-Li Shi, Lin-Fa Wang, Peng Zhou	mSphere		43	84
Discovery of a subgenotype of human coronavirus NL63 associated with severe lower respiratory tract infection in China, 2018	10.1080/22221751.2020.1717999	2020-01-29	2019-09-11	2020-01-02	Yanqun Wang, Xin Li, Wenkuan Liu, Mian Gan, Lu Zhang, Jin Wang, et al.	Emerging Microbes & Infections		113	140
Dynamics of transmissible gastroenteritis virus internalization unraveled by single‐virus tracking in live cells	10.1096/fj.201902455R	2020-02-04	2019-09-26	2020-01-20	Jian Wang, Yangyang Li, Shouyu Wang, Fei Liu	The FASEB Journal		116	131
Syndromic Surveillance System for MERS-CoV as New Early Warning and Identification Approach	10.2147/RMHP.S239984	2020-02-05	2019-11-25	2020-01-24	Maryam Salamatbakhsh, Kazhal Mobaraki, Jamal Ahmadzadeh	Risk Management and Healthcare Policy		60	72
Synanthropic rodents as virus reservoirs and transmitters	10.1590/0037-8682-0486-2019	2020-02-07	2019-11-17	2020-01-09	Mara Lucia Gravinatti, Carla Meneguin Barbosa, Rodrigo Martins Soares, Fábio Gregori			53	82
Development of an indirect ELISA for detecting porcine deltacoronavirus IgA antibodies	10.1007/s00705-020-04541-6	2020-02-12	2019-08-23	2020-01-01	Lu, Manman; Liu, Qiuge; Wang, Xiaobo; Zhang, Jialin; Zhang, Xin; Shi, Da; Liu, Jianbo; Shi, Hongyan; Chen, Jianfei; Feng, Li	Arch Virol		131	173
